# Supplementary material for: Comprehensive relationship analysis of the Long Non-Coding RNAs (lncRNAs) and the target mRNAs in Response to the infection of Edwardsiella anguillarum in European eel (Anguilla Anguilla) inoculated with Freund's adjuvant
Source: Research Square preprint supplement (doi:10.21203/rs.3.rs-1649271/v1), 2022-05-17
Supplement: Supplementary file 1 [file 02c2e1d692749c258b4ac1e9.xlsx]

## Sheet: FCIA_LivsCON_Li_GOEnrichment
GO_accession	Description	Term_type	Over_represented_pValue	Corrected_pValue	DEG_item	DEG_list	Bg_item	Bg_list	Gene_names
GO:0005216	ion channel activity	molecular_function	1.157e-37	2.7628e-34	338	6525	658	24278	118224959,118225515,118214837,118217656,118233269,118211196,118206775,118210086,118214306,118219437,118226580,118232056,118227104,118221542,118207514,118225690,118213439,118234504,118231630,118212370,118219166,118222594,118235369,118221473,118231088,118235572,118214913,118211426,118213219,118237084,118218002,118225939,118208360,118208634,118231508,118207210,118231330,118212609,118208732,118235719…
GO:0022838	substrate-specific channel activity	molecular_function	1.157e-37	2.7628e-34	338	6525	658	24278	118233371,118222710,118230610,118223119,118235035,118210737,118206982,118234976,118232384,118208327,118217543,118206984,118231366,118216225,118214468,118228253,118219519,118207466,118233011,118227069,118226585,118217400,118214564,118228499,118220381,118231414,118216728,118212234,118227029,118224766,118235515,118215450,118219534,118210338,118230302,118208646,118229820,118234374,118223938,118211388…
GO:0015267	channel activity	molecular_function	7.482e-37	8.9335e-34	341	6525	671	24278	118232505,118219794,118207935,118226153,118225560,118211309,118221578,118222786,118235894,118229345,118234982,118235895,118230865,118208653,118210841,118229640,118222617,118221878,118212476,118226746,118208535,118228498,118210440,118213029,118212900,118231176,118224622,118212571,118227004,118235469,118214986,118234813,118212982,118222776,118214659,118216079,118231329,118224380,118214228,118225768…
GO:0022803	passive transmembrane transporter activity	molecular_function	7.482e-37	8.9335e-34	341	6525	671	24278	118214946,118209792,118236298,118222854,118229538,118234495,118216561,118221040,118226587,118207440,118216673,118227637,118232350,118215842,118235077,118208963,118218811,118215103,118218425,118229438,118219259,118221954,118232867,118236723,118230529,118227522,118209263,118236592,118216014,118232285,118233096,118234860,118211389,118213864,118209073,118216641,118221076,118231101,118216154,118229419…
GO:0004888	transmembrane signaling receptor activity	molecular_function	2.0371e-33	1.9459e-30	630	6525	1596	24278	118207519,118209343,118208816,118208818,118218218,118209504,118216906,118210135,118220757,118207471,118231506,118229251,118213809,118209950,118208863,118235336,118229079,118210599,118232883,118207322,118209532,118207279,118215057,118208427,118213263,118211875,118213991,118222344,118217722,118217336,118214011,118237477,118218301,118213622,118229269,118215782,118235318,118228456,118212928,118221147…
GO:0004930	G-protein coupled receptor activity	molecular_function	1.7381e-32	1.3836e-29	555	6525	1389	24278	118236371,118227219,118207372,118236714,118222750,118211431,118207527,118209327,118235217,118233425,118209329,118236588,118215825,118227923,118222155,118209336,118222174,118222496,118211742,118235771,118228541,118209506,118209449,118212992,118231159,118208864,118212348,118223937,118209198,118211776,118235325,118208842,118222798,118211485,118210908,118212997,118212990,118222781,118235462,118231455…
GO:0038023	signaling receptor activity	molecular_function	2.7728e-30	1.8918e-27	661	6525	1721	24278	118223629,118222822,118218851,118231980,118207293,118225185,118209940,118219065,118220416,118225519,118206982,118208669,118236474,118208099,118209096,118214568,118210258,118235472,118206984,118226982,118223029,118230469,118211587,118206641,118227420,118230518,118216225,118209677,118212388,118234689,118216269,118233055,118217727,118210338,118219160,118234647,118217812,118228462,118228816,118206158…
GO:0004872	receptor activity	molecular_function	4.1141e-29	2.2341e-26	692	6525	1828	24278	118212648,118219437,118210237,118210250,118210362,118235431,118222675,118233902,118235319,118211823,118224040,118210363,118210963,118210094,118209217,118235298,118209455,118231362,118210180,118209008,118206770,118215283,118234543,118227047,118235460,118212404,118211439,118217019,118236719,118209470,118217703,118235638,118209159,118219166,118209500,118209110,118209210,118216232,118226365,118214190…
GO:0015276	ligand-gated ion channel activity	molecular_function	4.6779e-29	2.2341e-26	150	6525	242	24278	118231366,118232291,118206984,118234905,118208883,118217543,118215927,118216956,118219519,118207466,118228253,118219707,118217304,118216225,118222710,118220382,118211907,118206982,118210737,118206714,118234374,118209433,118229820,118208962,118232653,118210338,118230302,118231027,118216399,118234647,118212855,118228499,118232022,118220381,118209975,118226585,118206902,118234904,118212577,118228858…
GO:0022834	ligand-gated channel activity	molecular_function	4.6779e-29	2.2341e-26	150	6525	242	24278	118211907,118206714,118210737,118206982,118222710,118220382,118228253,118219519,118207466,118216956,118216225,118217304,118219707,118234905,118206984,118232291,118231366,118215927,118208883,118217543,118224766,118228858,118212577,118234904,118231414,118208439,118236435,118222463,118227029,118212234,118209975,118232022,118212855,118220381,118228499,118206902,118226585,118216399,118231027,118234647…
GO:0022836	gated channel activity	molecular_function	3.5087e-26	1.5234e-23	207	6525	391	24278	118223640,118208963,118235077,118215842,118235719,118207440,118227013,118216673,118235733,118236606,118234495,118226891,118214946,118209792,118211909,118209263,118216014,118230529,118231330,118221954,118232867,118231508,118229438,118219259,118208360,118208732,118218811,118218425,118215103,118216154,118214876,118236393,118228019,118235776,118231101,XLOC_168682,118213864,118216775,118234860,1182234…
GO:0007186	G-protein coupled receptor signaling pathway	biological_process	1.7715e-25	6.5898e-23	617	6525	1665	24278	118222750,118221725,118207372,118236714,118236371,118227219,118207527,118211431,118209329,118233425,118209327,118235217,118235807,118215825,118222155,118227923,118236588,118222496,118209336,118222174,118209506,118209449,118235771,118228541,118211742,118208864,118231159,118212992,118228248,118209198,118211776,118216267,118212348,118223937,118211485,118212997,118210908,118222798,118208842,118235325…
GO:0005230	extracellular ligand-gated ion channel activity	molecular_function	1.7937e-25	6.5898e-23	100	6525	144	24278	118230135,118234504,118226580,118225560,118214825,118219437,118206775,118210076,118235894,118223688,118222651,118235895,118210841,118229640,118217656,118208653,118226746,118230025,118222617,118228498,118223282,118224959,118233459,118212571,118227071,118235469,118227004,118222123,118206577,118232054,118235572,118231329,118235369,118228254,118227099,118236161,118215843,118219166,118220942,118221864…
GO:0016020	membrane	cellular_component	2.2232e-25	7.5844e-23	2619	6525	8410	24278	118221736,118225604,118236435,118232096,118216230,118231432,118216074,118221346,118214274,118206504,118212855,118218069,118237406,118216086,118223510,118222487,118234509,118236425,118225585,118217736,118224250,118213778,118234820,118222176,118223028,118215576,118210247,118230677,118221910,118220399,118229451,118235219,118217700,118230348,118211393,118235254,118215332,118228049,118228899,118208883…
GO:0004871	signal transducer activity	molecular_function	1.7519e-23	5.5781e-21	721	6525	2004	24278	118230469,118226982,118223029,118206984,118235472,118210258,118216225,118219645,118230518,118227420,118206641,118211587,118230660,118207293,118231980,118218851,118222822,118223629,118209096,118214568,118208099,118236474,118208669,118225519,118206982,118220416,118219065,118209940,118225185,118210338,118217727,118233055,118216269,118234647,118219160,118225406,118209677,118234689,118212388,118208932…
GO:0060089	molecular transducer activity	molecular_function	9.0334e-23	2.6965e-20	752	6525	2111	24278	118236711,118230442,118223688,118213198,118221843,118229006,118218673,118219625,118216706,118230391,118227528,118233112,118235729,118213426,118218302,118230202,118211895,118229043,118217159,118210076,118224985,118207730,118232831,118236281,118210962,118211455,118220942,118229449,118206231,118209161,118236540,118215550,118219683,118236261,118212406,118228238,118212720,118209348,118234363,118232174…
GO:0023052	signaling	biological_process	2.6491e-16	7.4424e-14	1275	6525	3963	24278	118208816,118207519,118206572,118225980,118216641,118208818,118211315,118210135,118206571,118229251,118229090,118212277,118209950,118213809,118229431,118232883,118207322,118234825,118229079,118208863,118235336,118218235,118213263,118208427,118209532,118211875,118217722,118221872,118222344,118224968,118221756,118221696,118237477,118216857,118215782,118229269,118221147,118225953,118221644,118209185…
GO:0044700	single organism signaling	biological_process	7.2603e-16	1.9264e-13	1267	6525	3948	24278	118209287,118220131,118209462,118210307,118229168,118227046,118210566,118229808,118206501,118213827,118206813,118234268,118232361,118209007,118226789,118232849,118235447,118236367,118211106,118220897,118235842,118208612,118209346,118222791,118210760,118221415,118236330,118206513,118225285,118215311,118235860,118232928,118233743,118225361,118219228,118226026,118224830,118207438,118207956,118233709…
GO:0007154	cell communication	biological_process	8.2734e-16	2.0797e-13	1288	6525	4021	24278	118216931,118228115,118210133,118210445,118235318,118228456,118232774,118235794,118232128,118230331,118218301,118213622,118207503,118216897,118207689,118221155,118231383,118214011,118230430,118225820,118215641,118210949,118231403,118207440,118217336,118237156,118213991,118231142,118215735,118217106,118207279,118228196,118215057,118210599,118236213,118226967,118236311,118231506,118210164,118220757…
GO:0007165	signal transduction	biological_process	1.1254e-15	2.6875e-13	1261	6525	3933	24278	118213629,118208401,118217159,118230202,118218388,118207182,118218302,118216706,118221234,118207422,118213198,118214820,118236711,118229604,118217167,118232414,118232459,118234624,118209486,118223368,118232174,118230316,118209348,118215550,118207311,118236540,118209161,118210696,118225293,118227995,118206581,118219240,118236611,118208868,118207460,118227763,118210108,118210624,118226887,118222541…
GO:0050789	regulation of biological process	biological_process	1.3398e-15	3.0471e-13	2178	6525	7147	24278	118227220,118209206,118213004,118216443,118209851,118223508,118229114,118210145,118219094,118226681,118235337,118224997,118223603,118232019,118208360,118236358,118222737,118237161,118222209,118230855,118208483,118219089,118231588,118227039,118225995,118234403,118236288,118212462,118222281,118218040,118222182,118228260,118227503,118216292,118226021,118221154,118210237,118210973,118217866,118210362…
GO:0005515	protein binding	molecular_function	1.5189e-15	3.2975e-13	2696	6525	8861	24278	118215508,118220430,118226109,118230726,118217196,118229351,118214658,118216497,118218688,118209103,118212892,118217672,118231696,118209083,118228974,118229461,118229908,118228908,118206758,118225454,118228938,118210937,118217942,118209793,118210658,118218516,118206158,118215029,118222365,118210672,118237560,118209949,118208118,118211258,118219127,118216167,118208540,118226851,118235929,118206865…
GO:0050794	regulation of cellular process	biological_process	2.4624e-15	5.1133e-13	2115	6525	6934	24278	118225179,118213014,118215006,118236620,118228248,118220565,118214918,118206914,118229553,118229550,118211742,118235771,118207950,118215400,118211632,118231539,118208791,118225468,118209327,118211984,118211251,118234905,118225596,118211846,118222155,118210325,118234827,118208532,118232369,118237424,118215534,118207372,118222750,118233113,118211431,118211351,118234329,118235453,118235743,118236231…
GO:0065007	biological regulation	biological_process	3.2861e-15	6.5393e-13	2239	6525	7375	24278	118232834,118226305,118232483,118216960,118235919,118232195,118220702,118207236,118214427,118213341,118213013,118209961,118207891,118210870,118237431,118221152,118207388,118234136,118224751,118218921,118222148,118227991,118232860,118219764,118212869,118208236,118210880,118211130,118235272,118213281,118213833,118209484,118209690,118226412,118231797,118229565,118225759,118218168,118237305,118218766…
GO:0031224	intrinsic component of membrane	cellular_component	6.7052e-15	1.281e-12	1553	6525	4982	24278	118223959,118216857,118215782,118229269,118218151,118220419,118237477,118235804,XLOC_265637,118209185,118221147,118228803,118225953,118221644,118224740,118223388,118231209,118221872,118217722,118222344,118216673,118233189,118219062,118235673,118233121,118220793,118212410,118211062,118211875,118224968,118231318,118209792,118221040,118222688,118233950,118229157,118209950,118213809,118212395,1182292…
GO:0016021	integral component of membrane	cellular_component	1.1035e-14	2.0271e-12	1539	6525	4940	24278	118235302,118226261,118223175,118222554,118233285,118231730,118221583,118208943,118211909,118228118,118206211,118233796,118218349,118216564,118230200,118218685,118207952,118227846,118237066,118209639,118219507,118225155,118221030,118209848,118218943,118232013,118225116,118211172,118209542,118233175,118220059,118214876,118208967,118230632,118212991,118236748,118224048,118228313,118221648,118228188…
GO:0004970	ionotropic glutamate receptor activity	molecular_function	3.3733e-12	5.7539e-10	40	6525	53	24278	118212370,118206902,118226585,118218514,118217186,118219166,118220942,118232022,118221864,118209975,118236161,118235369,118224766,118228858,118235776,118234374,118228019,118212571,118234647,118223282,118222710,118217656,118219259,118221954,118223688,118218811,118211907,118208732,118215927,118235719,118206775,118210076,118208883,118232291,118219437,118217304,118225560,118230135,118216956,118234504
GO:0008066	glutamate receptor activity	molecular_function	3.3733e-12	5.7539e-10	40	6525	53	24278	118236161,118228858,118224766,118235369,118226585,118206902,118212370,118209975,118221864,118217186,118219166,118232022,118220942,118218514,118234647,118212571,118234374,118228019,118235776,118221954,118217656,118219259,118208732,118218811,118211907,118223688,118223282,118222710,118225560,118217304,118234504,118216956,118230135,118208883,118210076,118235719,118206775,118215927,118219437,118232291
GO:0044425	membrane part	cellular_component	4.7157e-11	7.3895e-09	1734	6525	5750	24278	118227047,118234543,118228738,118206770,118209008,118227879,118236457,118217999,118229275,118206622,118233668,118211265,118221385,118209159,118217703,118209470,118236719,118222788,118219714,118217687,118213658,118208915,118209110,118235007,118213888,118218037,118231630,118214190,118213854,118209856,118214249,118216415,118213186,118235837,118234056,118229966,118221191,118208085,118213162,118208802…
GO:0005242	inward rectifier potassium channel activity	molecular_function	4.9347e-11	7.3895e-09	31	6525	40	24278	118208964,118211909,118218525,118209792,118231176,118219519,118216399,118219709,118227104,118235733,118234495,118226153,118236216,118208962,118234905,118216673,118230302,118217543,118214659,118216079,118216154,118234904,118232990,118236502,118229438,118221878,118212234,118227375,118208439,118210440,118209263
GO:0015075	ion transmembrane transporter activity	molecular_function	4.9511e-11	7.3895e-09	593	6525	1746	24278	118209202,118223688,118234462,118233358,118233787,118217073,118227378,118233459,118229346,118207069,118236790,118218315,118217129,118210569,118236216,118223995,118231861,118233356,118210076,118231451,118228823,118228868,118220942,118212720,118228518,118219683,118219755,118212406,118220429,118222123,118206577,118208281,118232162,118232384,118227329,118209643,118223119,118210737,118235035,118233766…
GO:0051716	cellular response to stimulus	biological_process	6.1513e-11	8.9026e-09	1364	6525	4445	24278	118211454,118206226,118217812,118219779,118228462,118209039,118230394,118237260,118231609,118210031,118226289,118228230,118216826,118227125,118235309,118208605,118228030,118206454,118227092,118219931,118233413,118213938,118212898,118231408,118232612,118219894,118222230,118210398,118216513,118222316,118237369,118229381,118231807,118207550,118222175,118231122,118207467,118211641,118210651,118215744…
GO:0005231	excitatory extracellular ligand-gated ion channel activity	molecular_function	3.6313e-10	5.1009e-08	31	6525	40	24278	118212571,118217304,118225560,118227071,118234647,118230135,118216956,118234504,118235572,118206775,118210338,118235719,118208883,118206984,118228019,118232291,118206982,118236161,118221954,118223688,118235369,118224766,118228858,118223282,118212370,118206902,118226585,118218514,118217186,118221864,118209975
GO:0022891	substrate-specific transmembrane transporter activity	molecular_function	4.7241e-10	6.4464e-08	607	6525	1815	24278	118236606,118211909,118223640,118208360,118207210,118214654,118218352,XLOC_168682,118223475,118228193,118225116,118214876,118235776,118228019,118220386,118218685,118237066,118233699,118217088,118209639,118213941,118225271,118226580,118208037,118232056,118215007,118221542,118234318,118207514,118225690,118227616,118213162,118219437,118224048,118226074,118234358,118218443,118224959,118214837,1182077…
GO:0005234	extracellular-glutamate-gated ion channel activity	molecular_function	8.6589e-10	1.1488e-07	26	6525	31	24278	118208883,118206775,118235719,118228019,118232291,118225560,118234647,118212571,118217304,118216956,118234504,118230135,118206902,118226585,118212370,118223282,118221864,118209975,118217186,118218514,118221954,118236161,118228858,118224766,118235369,118223688
GO:0005215	transporter activity	molecular_function	1.5002e-09	1.9365e-07	771	6525	2381	24278	118214994,118226064,118223098,118217910,118226348,118230025,118218283,118208343,118218286,118211454,118235415,118222365,118233769,118218525,118230135,118216376,118224731,118207403,118214825,118209137,118236161,118227433,118217041,118222458,118216731,118220870,118207758,118222230,118231408,118212263,118226856,118230406,118227071,118207467,118208322,118231977,118230613,118235269,118229181,118225767…
GO:0006811	ion transport	biological_process	5.8018e-09	7.2919e-07	566	6525	1705	24278	118224968,118209792,118214946,118221040,118229538,118231833,118216673,118237156,118207440,118213589,118206545,118219062,118215842,118208963,118227637,118215103,118218811,118229438,118223959,118227522,118216857,118225924,118216014,118237477,118229641,118233096,118232285,118232898,118237175,118231101,118225377,118222815,118206572,118213055,118214531,118207509,118229419,118237211,118209547,118235392…
GO:0022857	transmembrane transporter activity	molecular_function	6.1727e-09	7.5592e-07	670	6525	2055	24278	118211815,118215598,118233357,118220888,118215843,118211916,118225768,118228373,118233359,118224923,118214228,118214986,118214659,118231329,118235469,118227004,118229081,118224622,118212571,118219229,118231947,118229944,118232566,118226790,118213029,118210440,118208535,118226755,118224666,118208653,118233575,118229163,118226746,118221878,118219293,118235895,118235894,118211309,118221578,118222786…
GO:0022892	substrate-specific transporter activity	molecular_function	8.2747e-09	9.88e-07	640	6525	1958	24278	118212406,118219755,118219683,118228518,118212720,118220942,118227537,118228868,118228823,118231451,118232162,118208281,118206577,118222123,118220429,118233459,118229346,118227378,118217073,118233787,118233358,118234462,118209202,118223688,118210076,118233356,118231861,118223995,118236216,118210569,118218315,118217129,118236790,118207069,118217400,118226585,118209633,118223178,118233011,118228499…
GO:0003993	acid phosphatase activity	molecular_function	1.1253e-08	1.3108e-06	96	6525	196	24278	118224923,118209136,118214236,118213139,118231962,118216614,118211788,118232405,118225081,118215229,118209234,118229204,118210639,118208528,118229465,118236457,118231859,118227030,118235694,118224407,118222615,118228844,118229634,118208234,118217664,118229216,118223851,118214625,118229071,118223425,118209793,118235890,118206824,118206979,118225894,118211758,118226349,118207989,118215775,118236452…
GO:0050896	response to stimulus	biological_process	1.688e-08	1.9195e-06	1609	6525	5418	24278	118231477,118228829,118210716,118217173,118218816,118207295,118234235,118216754,118223750,118226760,118233005,118218356,118228722,118208580,118212485,118224015,118219767,118210663,118227924,118214005,118235033,118224517,118237554,118211635,118216182,118223840,118211585,118211818,118224254,118236554,118212943,118227645,118217712,118235913,118225489,118225965,118220088,118235363,118230409,118206655…
GO:0005509	calcium ion binding	molecular_function	1.8314e-08	2.0341e-06	295	6525	817	24278	118221307,118212928,118228415,118237408,118233725,118209070,118237420,118221308,118226778,118228098,118218937,118231834,118230237,118225638,118207252,118227560,118218435,118219062,118211301,118226376,118214931,118228475,118233722,118209547,118208427,118216496,118210164,118226483,118235168,118212277,118231506,118218347,118221417,118233726,118212333,118218919,118230499,118216428,118207979,118223095…
GO:0055085	transmembrane transport	biological_process	2.5732e-08	2.793e-06	441	6525	1291	24278	118235253,118214143,118206523,118222237,118223510,118208172,118216698,118218069,118214593,118221432,118213014,118232937,118235488,118226564,118209433,118208962,118215338,118223881,118206265,118234904,118232096,118207538,118232585,118214156,118208439,118234467,118206504,118215683,118232022,118211419,118233126,118206884,118214274,118216230,118216956,118209327,118222574,118212866,118212117,118214454…
GO:0005244	voltage-gated ion channel activity	molecular_function	6.3644e-08	6.413e-06	79	6525	167	24278	118211426,118213219,118218827,118208322,118222891,118234813,118222776,118216079,118214659,118208964,118231176,118219709,118227433,118231630,118212406,118232274,118221473,118232990,118221569,118236502,118214228,118227375,118236216,118237470,118218525,118207069,118214371,118227104,118207514,118226153,118225515,118229559,118210440,118209202,118234982,118211196,118213833,118221878,118215338,118208962…
GO:0022832	voltage-gated channel activity	molecular_function	6.3644e-08	6.413e-06	79	6525	167	24278	118232274,118212406,118231630,118227433,118227375,118232990,118221569,118214228,118236502,118221473,118222776,118214659,118216079,118208322,118222891,118234813,118211426,118213219,118218827,118219709,118231176,118208964,118210440,118229559,118225515,118221878,118213833,118211196,118234982,118209202,118237470,118236216,118207514,118226153,118227104,118214371,118218525,118207069,118214564,118207056…
GO:0044763	single-organism cellular process	biological_process	6.4452e-08	6.413e-06	2519	6525	8694	24278	118231383,118229538,118211960,118214011,118213701,118225820,118231833,118215641,118207503,118216897,118207689,118223589,118231142,118215735,118210949,118217336,118237156,118206545,118219134,118235318,118229438,118228456,118213165,118213728,118230331,118213622,118227140,118235794,118232128,118217660,118211647,118209708,118225839,118216906,118236333,118218218,118222815,118225377,118210599,118236213…
GO:0005261	cation channel activity	molecular_function	5.0759e-07	4.9475e-05	127	6525	315	24278	118232990,118221569,118214228,118236502,118222218,118216712,118228062,118228823,118225768,118227375,118224761,118227433,118228829,118233741,118220888,118229818,118212406,118232274,118231630,118231176,118208964,118213029,118206425,118227071,118225084,118219709,118211426,118218827,118213219,118208281,118222776,118214659,118216079,118208322,118235572,118214986,118222891,118234813,118234636,118209202…
GO:0022843	voltage-gated cation channel activity	molecular_function	1.0132e-06	9.678e-05	64	6525	134	24278	118210440,118225515,118221878,118213833,118211196,118237470,118236216,118226153,118227104,118214371,118218525,118207069,118212406,118232274,118231630,118227433,118227375,118232990,118221569,118236502,118214659,118216079,118208322,118211426,118218827,118213219,118219709,118231176,118208964,118209263,118234714,118223119,118229438,118222173,118217543,118216673,118207440,118234905,118234495,118235733…
GO:0005267	potassium channel activity	molecular_function	1.9059e-06	0.00017848	65	6525	140	24278	118216014,118209263,118215103,118229197,118229438,118234905,118216673,118217543,118211909,118209792,118214946,118219519,118212612,118235733,118234495,118221920,118234904,118235515,118218685,118207056,118209389,118212234,118208439,118208962,118234374,118223938,118230302,118208646,118216154,118223475,118224331,118216399,118214593,118211389,118210440,118234462,118213833,118221878,118217910,118236216…
GO:0003777	microtubule motor activity	molecular_function	2.0578e-06	0.000189	45	6525	80	24278	118209690,118227650,118224973,118227878,118207689,118211129,118211817,118222763,118206350,118230534,118223905,118206359,118237560,118224900,118230421,118235272,118208557,118234871,118213624,118216538,118225567,118211101,118222334,118218729,118209172,118224275,118215393,118237112,118210635,118213181,118225311,118235328,118221492,118231944,118219041,118229962,118206358,118226266,118225561,118222522…
GO:0015079	potassium ion transmembrane transporter activity	molecular_function	3.9853e-06	0.00035913	66	6525	145	24278	118234904,118235515,118209389,118207056,118212234,118208439,118218685,118221920,118216399,118223475,118224331,118211389,118214593,118234374,118223938,118208962,118208646,118216154,118230302,118229197,118215103,118229438,118216014,118209263,118219519,118211909,118214946,118209792,118234495,118235733,118212612,118216673,118234905,118217543,118232990,118236502,118228823,118227375,118228829,118227433…
GO:0098609	cell-cell adhesion	biological_process	4.3675e-06	0.00038628	84	6525	195	24278	118223754,118225775,118214762,118228064,118222343,118233008,118224689,118208441,118210981,118222414,118226727,118211647,118211055,118234497,118233916,118230499,118207979,118218490,118218347,118231506,118225732,118208427,118232172,118217760,118209547,118227908,118219062,118225135,118213791,118226520,118226789,118224284,118223305,118235856,118232280,118208898,118233285,118218151,118226764,118221308…
GO:0044765	single-organism transport	biological_process	7.2046e-06	0.00062562	930	6525	3037	24278	118226074,118211930,118234358,118222855,118224048,118231825,118214837,118218443,118224959,118208037,118226580,118215007,118212185,118232056,118221317,118234318,118207514,118224279,118225690,118214133,118213162,118219437,118227616,118208272,118226826,118214249,118234056,118228377,118213186,118209210,118235007,118213658,118219166,118222594,118217687,118231630,118218037,118213888,118224234,118221385…
GO:0005249	voltage-gated potassium channel activity	molecular_function	9.1029e-06	0.00077635	49	6525	102	24278	118209263,118210440,118221878,118213833,118229438,118237470,118216673,118234905,118236216,118217543,118219519,118209792,118207069,118214946,118211909,118218525,118226153,118235733,118234495,118227104,118214371,118227433,118232274,118231630,118235515,118236502,118232990,118234904,118208439,118227375,118212234,118209389,118207056,118223938,118208962,118218827,118211426,118216079,118214659,118216154…
GO:0005102	receptor binding	molecular_function	1.0397e-05	0.0008712	347	6525	1071	24278	118231419,118235397,118210147,118213009,118220200,118208041,118209442,118235431,118226952,118226971,118209937,118218345,118223517,118213439,118227450,118213061,118214746,118216348,118213469,118214469,118215026,118206213,118211762,118234358,118235589,118211930,118216337,118209195,118214913,118217697,118225371,118211911,118207897,118229465,118217608,118210590,118219274,118212376,118207245,118208235…
GO:0007600	sensory perception	biological_process	1.5002e-05	0.0012144	47	6525	105	24278	118235254,118209059,118211587,118209109,118230768,118225039,118229294,118224985,118219900,118228049,118211875,118234468,118212997,118217126,118211485,118219921,118211806,118229430,118225079,118211431,118225122,118229501,118211585,118235223,118211588,118231595,118231588,118210663,118225202,118211584,118216906,118210964,118211438,118212991,118211439,118219914,118221458,118213263,118226021,118208932…
GO:0050877	neurological system process	biological_process	1.5002e-05	0.0012144	47	6525	105	24278	118217126,118219921,118211485,118212997,118229430,118211806,118234468,118211585,118229501,118225122,118235223,118225079,118211431,118230768,118209059,118235254,118209109,118211587,118219900,118224985,118228049,118211875,118225039,118229294,118210599,118217275,118232571,118226021,118213263,118221458,118208932,118225061,118222273,118220942,118208496,118231588,118211588,118231595,118216906,118210663…
GO:1902578	single-organism localization	biological_process	1.5628e-05	0.001244	945	6525	3102	24278	118208647,118228324,118236326,118222218,118212201,118228062,118234361,118223684,118211646,118209634,118218827,118225084,118237140,118210964,118215209,118209996,118210359,118233598,118225288,118212651,118223275,118237169,118229559,118229009,118223989,118224398,118209580,118229416,118215519,118215963,118221081,118230536,118236132,118233695,118226044,118214371,118231317,118210802,118224695,118212979…
GO:0006813	potassium ion transport	biological_process	1.8e-05	0.0014093	68	6525	157	24278	118231176,118208964,118225084,118219709,118211426,118214659,118231678,118216079,118208322,118232990,118236502,118227375,118227433,118229818,118222458,118232274,118231630,118207005,118218525,118207069,118226153,118214371,118227104,118210636,118237470,118236216,118221878,118217910,118234462,118213833,118210440,118216399,118228043,118224331,118214939,118214593,118223938,118208962,118207143,118216154…
GO:0005576	extracellular region	cellular_component	2.0397e-05	0.0015712	631	6525	2039	24278	118221415,118212118,118226276,118220617,118230279,118217682,118206513,118231490,118235863,118234497,118211614,118218789,118210713,118231293,118233858,118233377,118220131,118234281,118208557,118213103,118210645,118217162,118211502,118206579,118207389,118230016,118225887,118225501,118217625,118211203,118217198,118235447,118229258,118213139,118212194,118215483,118213577,118208159,118236164,118222374…
GO:0003008	system process	biological_process	2.3534e-05	0.0017841	58	6525	138	24278	118213787,118230768,118235254,118209059,118209109,118211587,118224985,118219900,118211875,118228049,118210799,118225039,118229294,118212997,118221954,118211485,118217126,118219921,118211806,118229430,118211762,118234468,118225122,118229501,118211585,118229453,118235223,118225079,118214653,118211431,118231293,118211588,118231595,118231588,118219274,118211584,118210663,118225202,118216906,118210964…
GO:0007156	homophilic cell adhesion via plasma membrane adhesion molecules	biological_process	3.5119e-05	0.0025938	68	6525	152	24278	118232302,118209153,118226920,118214698,118233484,118233001,118231953,118222349,118217945,118209628,118228462,118236549,118214837,118228406,118224910,118215172,118211168,118219222,118226145,118211574,118210663,118210027,118224656,118224664,118231206,118221462,118228251,118226520,118219062,118225135,118224284,118223305,118226789,118226764,118221308,118233285,118232280,118235856,118221307,118228415…
GO:0032501	multicellular organismal process	biological_process	3.53e-05	0.0025938	368	6525	1128	24278	118223875,118235254,118227435,118219900,118228049,118232948,118210799,118229430,118214940,118222785,118223940,118211907,XLOC_283220,118231328,118235743,118216422,118207104,118209873,118211431,118208864,118214143,118230210,118222610,118228248,118233039,118217901,118227043,118219217,118210807,118227124,118212446,118212348,118213211,118232096,118231681,118216815,118219368,118226765,118209975,1182201…
GO:0098742	cell-cell adhesion via plasma-membrane adhesion molecules	biological_process	4.628e-05	0.003349	72	6525	165	24278	118222414,118210981,118226727,118224689,118208441,118211055,118211647,118228064,118214762,118225775,118223754,118233008,118222343,118208427,118225732,118209547,118227908,118217760,118232172,118218490,118207979,118230499,118233916,118234497,118218347,118231506,118224284,118223305,118226789,118225135,118219062,118226520,118233036,118223319,118224732,118236174,118221307,118228415,118232280,118235856…
GO:0044699	single-organism process	biological_process	5.7963e-05	0.0041318	3091	6525	10934	24278	118228251,118232464,118227218,118225471,118221831,118237110,118220538,118210141,118210964,118216888,118225084,118218230,118237172,118216038,118218827,118219613,118235250,118231360,118221081,118213038,118232510,118222798,118214261,118214625,118224398,118234341,118229559,118225288,118233598,118206488,118212990,118235462,118212104,118212979,118208811,118224695,118210802,118214371,118226044,118233695…
GO:0007018	microtubule-based movement	biological_process	6.2733e-05	0.0044061	45	6525	89	24278	118209690,118224973,118227650,118227878,118211817,118207689,118211129,118222763,118230534,118206350,118223905,118224900,118237560,118206359,118208557,118230421,118235272,118216538,118225567,118213624,118234871,118211101,118222334,118224275,118209172,118218729,118215393,118237112,118210635,118213181,118235328,118225311,118221492,118219041,118231944,118229962,118206358,118222522,118226266,118225561…
GO:0022610	biological adhesion	biological_process	7.1882e-05	0.0049755	200	6525	569	24278	118214499,118228064,118216641,118223754,118225775,118233008,118222343,118221499,118214489,118211055,118207292,118223813,118228853,118211647,118207979,118230499,118233916,118234497,118226483,118219507,118231506,118218347,118208427,118221154,118209480,118221779,118214446,118209547,118227908,118217760,118213791,118225135,118219062,118233139,118218435,118206211,118223589,118226789,118211960,118216882…
GO:0051260	protein homooligomerization	biological_process	7.7107e-05	0.0052609	47	6525	103	24278	118208343,118208535,118218812,118211651,118208732,118227390,118226984,118236548,118231428,118211907,118218811,118229345,118232384,118212476,118233269,118231789,118235841,118233035,118207893,118215927,118219794,118225626,118210569,118232056,118207935,118227433,118220942,118219166,118232022,118211419,118217400,118206884,118219755,118227069,118213821,118231088,118224380,118207538,118217315,118228231…
GO:0007155	cell adhesion	biological_process	8.4318e-05	0.0056719	194	6525	551	24278	118218435,118233139,118219062,118213791,118225135,118216882,118211960,118226789,118223589,118206211,118233285,118218151,118237477,118226764,118221308,118219982,118218065,118208898,118210445,118228415,118226103,118221307,118209462,118236174,118222343,118233008,118223754,118225775,118214499,118228064,118216641,118211647,118223813,118228853,118211055,118214489,118221499,118231506,118218347,118219507…
GO:0051259	protein oligomerization	biological_process	9.2861e-05	0.0061598	82	6525	207	24278	118214010,118211271,118215927,118233985,118206211,118215582,118224491,118211651,118212752,118231428,118236548,XLOC_265637,118226293,118208732,118232384,118218811,118211907,118207606,118235841,118215164,118231789,118213306,118216641,118228175,118206265,118229203,118223013,118206523,118210893,118232022,118211419,118217400,118206884,118227069,118213821,118215450,118219842,118218466,118207538,1182173…
GO:0042578	phosphoric ester hydrolase activity	molecular_function	0.00011634	0.0076113	211	6525	598	24278	118225468,118213076,118211984,118214720,118225274,118218409,118234881,118208868,118207177,118221053,118213339,118220849,118209773,118219900,118209005,118230706,118222974,118223626,118217113,118214515,118225026,118215748,118234132,118222967,118208044,118222800,118214308,118207733,118207361,118222597,118222487,118218992,118219787,118236593,118224250,118234509,118213843,118214908,118207772,118207119…
GO:0016791	phosphatase activity	molecular_function	0.00011804	0.0076184	169	6525	468	24278	118213076,118211984,118214720,118225274,118218409,118234881,118208868,118221053,118207177,118213339,118220849,118209773,118230706,118209005,118222974,118217113,118214515,118225026,118215748,118234132,118222967,118208044,118222800,118207733,118222597,118222487,118207361,118218992,118219787,118236593,118224250,118234509,118207772,118214908,118229720,118207119,118229387,118227623,118213136,118233604…
GO:0005578	proteinaceous extracellular matrix	cellular_component	0.00013389	0.0085263	83	6525	219	24278	118226412,118210973,118220269,118225761,118209728,118230656,118236765,118210201,118221542,118207455,118236717,118215497,118209059,118237136,118217639,118236169,118233219,118223595,118218667,118227203,118220281,118234358,118228147,118233159,118216375,118225314,118222175,118210826,118231859,118219561,118216476,118227179,118222215,118209494,118230602,118233114,118231630,118219894,118223750,118221951…
GO:0031012	extracellular matrix	cellular_component	0.00018573	0.011672	118	6525	329	24278	118226692,118223750,118231630,118219894,118216416,118212235,118237063,118221951,118220103,118236708,118216737,118226508,118209103,118223579,118224570,118222421,118212780,118210826,118216375,118211492,118222175,118225314,118219561,118216476,118227179,118231859,118222215,118233114,118207117,118209494,118230602,118217639,118213402,118236169,118233219,118237136,118223595,118224902,118226695,118232490…
GO:0005882	intermediate filament	cellular_component	0.00023653	0.014483	76	6525	194	24278	118211265,118217246,118220429,118211641,118222231,118210449,118237385,118221073,118228859,118222869,118214427,118223994,118210553,118236281,118220554,118234730,118208647,118232101,118219993,118231282,118228189,118207926,118220534,118207182,118224860,118226971,118207403,118207914,118219227,118237482,118231797,118226370,118221100,118214066,118211930,118237225,118233598,118220871,118222134,118234374…
GO:0045111	intermediate filament cytoskeleton	cellular_component	0.00023653	0.014483	76	6525	194	24278	118215582,118223946,118235475,118229100,118206211,118216435,118216008,118212410,118217178,118223963,118215164,XLOC_265637,118208532,118237328,118208975,118212080,118231980,118228522,118219816,118235794,118222134,118217785,118208621,118220555,118233064,118234374,118228451,118230887,118213172,118216933,118217042,118221415,118212876,118219842,118218466,118233790,118211234,118219179,118207182,1182248…
GO:0050909	sensory perception of taste	biological_process	0.00027448	0.016594	28	6525	60	24278	118208496,118211431,118220942,118235223,118225061,118229501,118211585,118226021,118213263,118232571,118229430,118211806,118212997,118219921,118211485,118229294,118211438,118212991,118225039,118228049,118211875,118224985,118211439,118211587,118211584,118210663,118211588,118231588
GO:0044707	single-multicellular organism process	biological_process	0.0002833	0.016913	304	6525	942	24278	118210799,118228049,118232948,118219900,118235254,118223875,118211431,118207104,XLOC_283220,118216422,118231328,118214940,118229430,118222785,118223940,118212348,118227124,118212446,118217901,118219217,118227043,118210807,118233039,118222610,118228248,118230210,118214143,118208864,118214470,118226765,118219368,118216815,118232096,118213211,118209690,118217908,118233707,118217086,118223263,1182307…
GO:0005540	hyaluronic acid binding	molecular_function	0.00038595	0.022757	18	6525	30	24278	1.18216e+161
GO:0007606	sensory perception of chemical stimulus	biological_process	0.00043371	0.025261	38	6525	90	24278	118219914,118211439,118212991,118211438,118225202,118210663,118216906,118211584,118231588,118211588,118225061,118222273,118208496,118220942,118232571,118210599,118208932,118213263,118226021,118211875,118228049,118224985,118229294,118225039,118209109,118211587,118235254,118209059,118235223,118229501,118211585,118225122,118211431,118229430,118211806,118219921,118211485,118212997
GO:0007339	binding of sperm to zona pellucida	biological_process	0.00046551	0.025852	16	6525	25	24278	1.18232e+143
GO:0008037	cell recognition	biological_process	0.00046551	0.025852	16	6525	25	24278	1.18209e+143
GO:0009988	cell-cell recognition	biological_process	0.00046551	0.025852	16	6525	25	24278	1.1821e+143
GO:0035036	sperm-egg recognition	biological_process	0.00046551	0.025852	16	6525	25	24278	1.18229e+143
GO:0030312	external encapsulating structure	cellular_component	0.00047848	0.026267	70	6525	174	24278	118233086,118233397,118221185,118212439,118222691,118234255,118208566,118207605,118221262,118235067,118230721,118208703,118217981,118210696,118219906,118232990,118226140,118228251,118211573,118210009,118218362,118229389,118222349,118219285,118210880,118226946,118208060,118207532,118223835,118233222,118216736,118216228,118235428,118210872,118229820,118211389,118211978,118231588,118214057,118207183…
GO:0007275	multicellular organismal development	biological_process	0.00061225	0.033229	162	6525	468	24278	118207104,118225636,118216422,118231328,XLOC_283220,118221326,118229813,118223940,118222785,118214940,118235354,118207481,118232948,118212981,118214470,118221328,118214966,118232214,118219368,118236318,118232096,118233558,118213211,118223977,118213109,118221564,118212446,118227124,118210807,118227043,118233039,118237257,118210357,118230210,118213779,118213863,118208864,118210279,118229593,1182212…
GO:0044212	transcription regulatory region DNA binding	molecular_function	0.00066482	0.035676	13	6525	20	24278	1.18224e+116
GO:0006928	movement of cell or subcellular component	biological_process	0.0007046	0.037391	114	6525	311	24278	118210491,118235449,118232096,118213725,118223772,118226266,118225561,118207682,118206358,118211234,118216428,118228853,118230855,118208864,118221492,118217691,118235328,118213181,118217785,118223902,118227124,118230887,118215393,118213306,118209172,118226103,118224275,118234871,XLOC_265637,118216931,118213624,118216538,118225567,118208557,XLOC_283220,118231328,118232940,118225636,118222604,11820…
GO:0008083	growth factor activity	molecular_function	0.00096101	0.050437	70	6525	189	24278	118237163,118227535,118218663,118212376,118222230,118223668,118229069,118224654,118215463,118217697,118227406,118225258,118213966,118214913,118230406,118210590,118217608,118229465,118225371,118235174,118219868,118217860,118227202,118234937,118208333,118213432,118213856,118223071,118217330,118214947,118222643,118215928,118226952,118215285,118219179,118230499,118227229,118226585,118223694,118217214…
GO:0008509	anion transmembrane transporter activity	molecular_function	0.0010107	0.05247	65	6525	167	24278	118224695,118215007,118207514,118223257,118233172,118232197,118227616,118211237,118213162,118226206,118233787,118226074,118234982,118225288,118212651,118222639,118217073,118229147,118226755,118229559,118223762,118229944,118226856,118235269,118207194,118232162,118236457,118217780,118235164,118221473,118228203,118224923,118222218,118225950,118216754,118211815,118223723,118216225,118226737,118222574…
GO:0003774	motor activity	molecular_function	0.0013764	0.065802	83	6525	207	24278	118233456,118235328,118208284,118217691,118221492,118233064,118225980,118220555,118213181,118215393,118213306,118217042,118216601,118216933,118215170,118210491,118213725,118218466,118210622,118225561,118226266,118217177,118206358,118230534,118229100,118207689,118211129,118224973,118224275,118209172,118225821,118208557,118216538,118225567,118213624,118234871,XLOC_265637,118227865,118223905,1182285…
GO:0019953	sexual reproduction	biological_process	0.0014142	0.065802	93	6525	251	24278	118231072,118217558,118233397,118221185,118215405,118211982,118211160,118232174,118208566,118208890,118234255,118220689,118228502,118222231,118226824,118212439,118222691,118226305,118225088,118208703,118207721,118235067,118236556,118232990,118219906,118213139,118236452,118222349,118210009,118218362,118217129,118228804,118225157,118207532,118226946,118210880,118206297,118213469,118216736,118211930…
GO:0044703	multi-organism reproductive process	biological_process	0.0014142	0.065802	93	6525	251	24278	118236452,118217129,118218362,118210009,118222349,118213469,118206297,118210880,118226946,118207532,118228804,118225157,118220424,118223835,118211159,118211930,118217050,118216736,118211160,118215405,118211982,118221185,118233397,118217558,118231072,118212439,118222691,118222231,118226824,118228502,118234255,118208890,118220689,118208566,118232174,118235067,118207721,118208703,118225088,118226305…
GO:0002064	epithelial cell development	biological_process	0.0014329	0.065802	38	6525	87	24278	118208566,118211978,118234255,118231588,118218664,118222691,118212439,118211389,118233397,118221185,118235428,118216228,118217088,118225934,118219906,118232990,118213211,118208703,118235067,118219519,118235170,118222349,118212161,118210009,118206579,118218362,118227733,118216736,118211907,118208315,118223835,118207750,118207532,118219816,118210880,118235743,118226946,118216735
GO:0002065	columnar/cuboidal epithelial cell differentiation	biological_process	0.0014329	0.065802	38	6525	87	24278	118210880,118235743,118226946,118216735,118207532,118219816,118207750,118223835,118211907,118208315,118216736,118227733,118218362,118212161,118206579,118210009,118222349,118235170,118219519,118235067,118208703,118213211,118219906,118232990,118225934,118217088,118216228,118235428,118221185,118233397,118212439,118222691,118211389,118218664,118234255,118211978,118208566,118231588
GO:0002066	columnar/cuboidal epithelial cell development	biological_process	0.0014329	0.065802	38	6525	87	24278	118227733,118222349,118235170,118219519,118218362,118210009,118212161,118206579,118219816,118207532,118207750,118210880,118226946,118235743,118216735,118211907,118208315,118216736,118223835,118235428,118221185,118233397,118216228,118218664,118211978,118208566,118234255,118231588,118222691,118212439,118211389,118208703,118235067,118232990,118219906,118225934,118217088,118213211
GO:0005213	structural constituent of chorion	molecular_function	0.0014329	0.065802	38	6525	87	24278	118208703,118235067,118219906,118225934,118232990,118217088,118213211,118235428,118221185,118233397,118216228,118218664,118211978,118234255,118208566,118231588,118222691,118212439,118211389,118207532,118219816,118207750,118226946,118210880,118235743,118216735,118208315,118211907,118216736,118223835,118227733,118222349,118235170,118219519,118218362,118212161,118210009,118206579
GO:0007292	female gamete generation	biological_process	0.0014329	0.065802	38	6525	87	24278	118219906,118232990,118225934,118217088,118213211,118208703,118235067,118234255,118211978,118208566,118231588,118218664,118222691,118212439,118211389,118233397,118235428,118221185,118216228,118216736,118211907,118208315,118223835,118207750,118219816,118207532,118235743,118210880,118226946,118216735,118219519,118222349,118235170,118206579,118212161,118210009,118218362,118227733
GO:0007304	chorion-containing eggshell formation	biological_process	0.0014329	0.065802	38	6525	87	24278	118221185,118235428,118233397,118216228,118218664,118208566,118211978,118231588,118234255,118212439,118222691,118211389,118208703,118235067,118217088,118225934,118219906,118232990,118213211,118227733,118235170,118222349,118219519,118218362,118212161,118206579,118210009,118219816,118207532,118207750,118216735,118235743,118210880,118226946,118208315,118211907,118216736,118223835
GO:0030703	eggshell formation	biological_process	0.0014329	0.065802	38	6525	87	24278	118216228,118233397,118221185,118235428,118222691,118212439,118211389,118208566,118211978,118234255,118231588,118218664,118235067,118208703,118213211,118217088,118219906,118225934,118232990,118227733,118212161,118206579,118210009,118218362,118219519,118235170,118222349,118210880,118226946,118216735,118235743,118207750,118219816,118207532,118223835,118216736,118208315,118211907
GO:0030707	ovarian follicle cell development	biological_process	0.0014329	0.065802	38	6525	87	24278	118210880,118235743,118226946,118216735,118207750,118207532,118219816,118223835,118216736,118208315,118211907,118227733,118212161,118206579,118210009,118218362,118219519,118222349,118235170,118235067,118208703,118213211,118225934,118219906,118232990,118217088,118216228,118233397,118235428,118221185,118212439,118222691,118211389,118211978,118208566,118231588,118234255,118218664
GO:0048477	oogenesis	biological_process	0.0014329	0.065802	38	6525	87	24278	118208703,118235067,118217088,118225934,118219906,118232990,118213211,118233397,118221185,118235428,118216228,118211978,118208566,118231588,118234255,118218664,118212439,118222691,118211389,118207750,118219816,118207532,118235743,118210880,118226946,118216735,118216736,118208315,118211907,118223835,118227733,118219519,118235170,118222349,118212161,118206579,118210009,118218362
GO:0042600	chorion	cellular_component	0.0015932	0.07236	46	6525	110	24278	118208703,118235067,118217088,118219906,118232990,118225934,118226140,118228251,118213211,118233397,118221185,118235428,118210872,118216228,118211978,118208566,118231588,118214057,118234255,118207605,118218664,118222691,118212439,118211389,118207750,118207532,118219816,118235743,118216735,118210880,118226946,118216736,118211907,118208315,118223835,118227733,118219519,118235170,118222349,118222912…
GO:0030141	secretory granule	cellular_component	0.001606	0.07236	12	6525	20	24278	1.18231e+107
GO:0022414	reproductive process	biological_process	0.0016985	0.075813	106	6525	294	24278	118221185,118233397,118217558,118231072,118211160,118215405,118211982,118228502,118232174,118208890,118220689,118217608,118208566,118234255,118229394,118222691,118212439,118226824,118222231,118226305,118225088,118208703,118235067,118207721,118236556,118232990,118219906,118236022,118224654,118213139,118236452,118222349,118213439,118218362,118217129,118210009,118207532,118225157,118228804,118213469…
GO:0044767	single-organism developmental process	biological_process	0.0017181	0.075979	234	6525	719	24278	118235585,118233397,118231094,118230591,118208201,118218086,118209159,118224517,118222691,118217608,118234255,118218995,118207402,118207605,118211590,118235067,118219851,118235937,118207245,118208703,118215240,118221733,118224654,118236022,118220362,118229843,118227748,118219906,118214249,118224729,118224570,118216598,118210697,118222531,118208323,118210201,118218362,118213439,118214520,118211856…
GO:0006914	autophagy	biological_process	0.0027009	0.11623	113	6525	336	24278	118230887,118224190,118228248,118208259,118208621,118217785,118233858,118233476,118230855,118211234,118233790,118231858,118221154,118227846,118218466,118217042,118216933,118211126,118226544,118206759,118226376,118231403,118215527,118235869,118223885,118209327,118226806,118230534,118235794,118228522,118209908,118236408,118220419,118211564,118237477,118228301,118231328,118209565,118227329,118210520…
GO:0044702	single organism reproductive process	biological_process	0.002706	0.11623	85	6525	232	24278	118220808,118220199,118209975,118226585,118231681,118223210,118217088,118225934,118213211,118235390,118219841,118235428,118231613,118216228,118207733,118218664,118209698,118231588,118211978,118211389,118208869,118226333,118209873,118219816,118207750,118228141,118235743,118216735,118208315,118211907,118215990,118213715,118223127,118235354,118227733,118214720,118211407,118211203,118235170,118227435…
GO:0007338	single fertilization	biological_process	0.0027256	0.11623	23	6525	46	24278	1.18221e+206
GO:0009566	fertilization	biological_process	0.0027256	0.11623	23	6525	46	24278	1.18232e+206
GO:0010506	regulation of autophagy	biological_process	0.0030069	0.12709	58	6525	156	24278	118221015,118233222,118235212,118220131,118217348,118237154,118211930,118210520,118223098,118232510,XLOC_265637,118216931,118208532,118211564,118237477,118231651,118233598,118228916,118237514,118236034,118226971,118233413,118230534,118237345,118216376,118228189,118206747,118235869,118219993,118221031,118211185,118232002,118208070,118206759,118226376,118231403,118229966,118218356,118212966,1182105…
GO:0030855	epithelial cell differentiation	biological_process	0.0030437	0.12752	38	6525	90	24278	118211978,118234255,118208566,118231588,118218664,118222691,118212439,118211389,118233397,118235428,118221185,118216228,118225934,118219906,118232990,118217088,118213211,118208703,118235067,118219519,118222349,118235170,118212161,118210009,118206579,118218362,118227733,118216736,118211907,118208315,118223835,118207750,118219816,118207532,118235743,118226946,118210880,118216735
GO:0032502	developmental process	biological_process	0.0032343	0.13432	242	6525	754	24278	118224570,118224729,118214249,118219906,118227748,118236022,118229843,118220362,118224654,118234107,118221733,118215240,118208703,118235937,118207245,118235067,118219851,118211590,118207605,118207402,118218995,118217608,118234255,118224517,118222691,118209159,118218086,118230591,118208201,118231094,118233397,118235585,118209195,118216736,118223835,118216182,118214469,118231891,118210143,118209063…
GO:0007281	germ cell development	biological_process	0.0034139	0.14056	41	6525	99	24278	118236021,118206579,118212161,118210009,118217129,118218362,118219519,118222349,118235170,118227733,118223835,118216736,118208315,118211907,118226946,118210880,118216735,118235743,118207750,118207532,118219816,118222691,118212439,118211389,118211978,118234255,118208566,118231588,118218664,118216228,118231072,118233397,118235428,118221185,118213211,118232990,118219906,118225934,118217088,118235067…
GO:0005539	glycosaminoglycan binding	molecular_function	0.0037642	0.15366	25	6525	54	24278	1.18214e+224
GO:0022412	cellular process involved in reproduction in multicellular organism	biological_process	0.0041176	0.16666	47	6525	117	24278	118216736,118208315,118211907,118217050,118223835,118207750,118219816,118207532,118210880,118216735,118235743,118226946,118219519,118235170,118222349,118210009,118212161,118206579,118236021,118218362,118217129,118227733,118211203,118217088,118232990,118219906,118225934,118213211,118235390,118209975,118208703,118220808,118235067,118234255,118211978,118220689,118208566,118231588,118218664,118222691…
GO:0016763	transferase activity, transferring pentosyl groups	molecular_function	0.0041876	0.16807	40	6525	100	24278	118216383,118215387,118224715,118224188,118218087,118210905,118222487,118232473,118219368,118216039,118236574,118219803,118221334,118224347,118224731,118213739,118221034,118234881,118230806,118218108,118225686,118231011,118231310,118231584,118232475,118210359,118217694,118221801,118214444,118230608,118234329,118219982,118232472,118227379,118235478,118223127,118214191,118218088,118208315,118219713
GO:0001071	nucleic acid binding transcription factor activity	molecular_function	0.004852	0.19151	375	6525	1218	24278	118207195,118217082,118218463,118219555,118211709,118214407,118224783,118213446,118222650,118219764,118208627,118211905,118220765,118222873,118234736,118208202,118232915,118216416,118223266,118225486,118229898,118209425,118217981,118234719,118236093,118235919,118232195,118231398,118214427,118228062,118221329,118231797,118217908,118209968,118211042,118233870,118227672,118224334,118227330,118229565…
GO:0003700	transcription factor activity, sequence-specific DNA binding	molecular_function	0.004852	0.19151	375	6525	1218	24278	118232505,118234206,118213787,118216987,118208306,118234320,118218915,118206929,118215658,118215003,118230409,118219227,118206434,118209318,118211185,118227395,118206535,118232599,118234937,118212943,118233851,118235363,118225965,118220139,118233222,118235212,118230575,118214524,118230380,118210143,118211635,118229533,118221285,118214141,118209063,118211471,118212900,118210282,118219063,118208497…
GO:0051179	localization	biological_process	0.0050727	0.19858	1230	6525	4245	24278	118215683,118231681,118231612,118219842,118209407,118217042,118222463,118226544,118224251,118232653,118219217,118217785,118227799,118237400,118206523,118220819,118235253,118221432,118228522,118232828,118210947,118221933,118214515,118222173,118215477,118227217,118210520,118223914,118229197,118216018,118216556,118224868,118209172,118226797,118214010,118209489,118215927,118223875,118219707,118209425…
GO:0016762	xyloglucan:xyloglucosyl transferase activity	molecular_function	0.0054848	0.21125	4	6525	4	24278	1.1822e+35
GO:0048046	apoplast	cellular_component	0.0054848	0.21125	4	6525	4	24278	1.1822e+35
GO:0000976	transcription regulatory region sequence-specific DNA binding	molecular_function	0.0055573	0.21233	9	6525	14	24278	1.18237e+80
GO:0032922	circadian regulation of gene expression	biological_process	0.0067635	0.25637	8	6525	12	24278	1.18228e+71
GO:0005861	troponin complex	cellular_component	0.0072946	0.26195	13	6525	28	24278	1.18219e+116
GO:0005865	striated muscle thin filament	cellular_component	0.0072946	0.26195	13	6525	28	24278	1.18227e+116
GO:0030016	myofibril	cellular_component	0.0072946	0.26195	13	6525	28	24278	1.18212e+116
GO:0030017	sarcomere	cellular_component	0.0072946	0.26195	13	6525	28	24278	1.18222e+116
GO:0036379	myofilament	cellular_component	0.0072946	0.26195	13	6525	28	24278	1.18216e+116
GO:0043292	contractile fiber	cellular_component	0.0072946	0.26195	13	6525	28	24278	1.18216e+116
GO:0044449	contractile fiber part	cellular_component	0.0072946	0.26195	13	6525	28	24278	1.18227e+116
GO:0003006	developmental process involved in reproduction	biological_process	0.0074654	0.26374	54	6525	143	24278	118222785,118223835,118219936,118235354,118208315,118211907,118213038,118216736,118235743,118216735,118210880,118226946,118207532,118228842,118219816,118207750,118218362,118217129,118212161,118210009,118206579,118236021,118235170,118222349,118219519,118213439,118227733,118214931,118210523,118213211,118236022,118224654,118217088,118225934,118219906,118232990,118235067,118208703,118222691,118229394…
GO:0019031	viral envelope	cellular_component	0.0075449	0.26374	142	6525	435	24278	118213014,118206392,118224835,118208184,118231159,118217906,118207531,118223941,118228174,118228248,118218299,118217785,118227287,118217901,118210871,118222562,118210579,118208348,118223881,118216818,118213172,118217291,118218466,118211234,118219179,118221474,118227079,118206394,118233347,118233919,118221690,118217032,118210737,118210895,118211564,118231764,118216812,118225053,118225080,118219859…
GO:0036338	viral membrane	cellular_component	0.0075449	0.26374	142	6525	435	24278	118223233,118213841,118230279,118233790,118215311,118218123,118222281,118207953,118218685,118221415,118221779,118221154,118237067,118208621,118214493,118216641,118208355,118226333,118207292,118231730,118237105,118217884,118232361,118212176,XLOC_227793,118233344,118230338,118210074,118209070,118222250,118216564,118225118,118216103,118214011,118233950,118211653,118206211,118221155,118210320,1182266…
GO:0060429	epithelium development	biological_process	0.0075655	0.26374	42	6525	106	24278	118216736,118211907,118208315,118223835,118207750,118219816,118207532,118210880,118235743,118216735,118226946,118219519,118235170,118206641,118222349,118206579,118212161,118210009,118218362,118237470,118227733,118217088,118219906,118232990,118225934,118213211,118208703,118234107,118210868,118235067,118234255,118211978,118208566,118231588,118218664,118212439,118222691,118211389,118233397,118221185…
GO:0033130	acetylcholine receptor binding	molecular_function	0.0091928	0.31586	6	6525	8	24278	1.18227e+53
GO:0043495	protein anchor	molecular_function	0.0091928	0.31586	6	6525	8	24278	1.18226e+53
GO:0008092	cytoskeletal protein binding	molecular_function	0.0097602	0.33296	280	6525	882	24278	118234871,118226103,118209813,118232347,118228010,118216386,118210930,118223690,118224929,118210720,118232269,118207689,118231424,118214269,118210163,118218235,118208504,118221603,118222417,118211126,118217214,118231073,118226036,118221492,118225839,118223183,118218664,118236667,118236446,118225195,118222714,118228841,118230665,118215393,118228064,118216641,118233805,118236333,118207248,118230192…
GO:0019222	regulation of metabolic process	biological_process	0.010424	0.3531	928	6525	3191	24278	118236654,118232299,118211615,118206795,118235389,118225163,118217556,118217019,118235285,118218995,118211265,118224947,118222594,118225097,118222525,118229966,118228377,118214249,118209856,118214264,118210237,118229291,118226370,118234233,118234318,118215775,118233902,118212085,118236733,118222349,118233561,118234405,118213415,118223032,118206726,118211823,118235890,118210963,118209418,118228313…
GO:0009987	cellular process	biological_process	0.011358	0.38051	3910	6525	14164	24278	118234268,118232361,118222289,118213827,118206813,118211091,118219850,118227046,118229808,118229168,118221159,118209462,118220897,118237078,118235842,118225135,118225058,118224973,118235447,118225584,118207304,118206423,118232849,118209007,118224780,118235860,118230005,118233097,118234497,118223628,118214144,118223233,118206513,118220617,118226114,118236330,118209930,118230470,118210760,118229179…
8221285,118220424,118230865,118220139,118226629,118219227,118215003,118232197,118219221,118208408,118216125,118234320,118208306,118216987,118213343,118221733,118229574,118234460,118221087,118233741,118217071,118237443,118221262,118211590,118215589,118224380,118210766,118235463,118218897,118229554,118236708,118210504,118219765,118209501,118232912,118236295,118211870,118219222,118237072,118225311,1…
GO:0048646	anatomical structure formation involved in morphogenesis	biological_process	0.011428	0.38051	50	6525	133	24278	118230877,118208976,118217088,118219906,118225934,118232990,118213211,118221733,118208703,118235067,118218664,118211978,118208566,118234255,118231588,118211389,118222691,118212439,118212222,118221185,118235428,118212446,118233397,118235585,118216228,118211907,118223175,118208315,118216736,118223835,118207532,118219816,118207750,118221234,118216735,118235743,118210880,118226946,118235170,118222349…
GO:0006810	transport	biological_process	0.011473	0.38051	1165	6525	4044	24278	118221910,118208407,118223028,118220382,118207804,118223503,118231789,118222746,118229076,118219242,118218135,118221690,118206530,118215332,118216956,118232163,118222574,118217700,118206504,118226765,118214274,118216230,118232096,118207538,118236435,118216818,118209389,118221736,118223881,118208962,118234295,118206265,118225585,118210871,118216086,118223510,118207361,118216534,118222487,118214593…
GO:0015321	sodium-dependent phosphate transmembrane transporter activity	molecular_function	0.011762	0.38477	6	6525	9	24278	1.18227e+53
GO:0044341	sodium-dependent phosphate transport	biological_process	0.011762	0.38477	6	6525	9	24278	1.18227e+53
GO:0031323	regulation of cellular metabolic process	biological_process	0.011895	0.38645	889	6525	3059	24278	118207342,118223989,118213135,118235763,118206486,118210084,118229009,118228406,118232004,118233598,118227210,118231337,118233095,118231099,118234294,118214280,118232510,118213184,118221015,118221881,118210908,118224078,118207354,118211923,118216591,118206245,118215205,118206747,118229239,118212979,118212995,118224695,118224334,118213650,118227672,118225486,118229898,118208647,118216416,118222564…
GO:0051234	establishment of localization	biological_process	0.012203	0.39379	1169	6525	4061	24278	118229944,118207431,118226790,118227932,118215051,118228373,118233359,118234730,118225768,118211916,118216663,118215697,118208200,118234948,118215843,118215598,118226153,118232505,118209406,118214149,118210697,118218915,118221578,118222786,118211309,118221878,118226746,118225063,118229163,118214676,118235895,118232599,118210619,118236505,118220782,118226755,118228804,118228853,118218936,118209073…
GO:0016814	hydrolase activity, acting on carbon-nitrogen (but not peptide) bonds, in cyclic amidines	molecular_function	0.012791	0.41	18	6525	41	24278	1.18225e+161
GO:0015672	monovalent inorganic cation transport	biological_process	0.013585	0.43255	177	6525	557	24278	118208201,118213219,118211426,118209248,118214659,118231678,118229275,118216079,118232566,118207173,118231176,118231947,118233741,118217403,118231630,118231272,118207271,118216387,118211916,118228377,118226832,118208098,118210636,118235894,118227104,118226153,118234318,118225515,118218443,118210440,118224254,118219293,118234358,118224666,118224820,118221878,118226206,118225377,118222815,118216154…
GO:0051015	actin filament binding	molecular_function	0.014624	0.46254	16	6525	35	24278	1.18229e+143
GO:0009896	positive regulation of catabolic process	biological_process	0.015315	0.47318	45	6525	126	24278	118237514,118211564,118237477,118233598,118231651,118237154,118216931,XLOC_265637,118208532,118232510,118210520,118220131,118221015,118217348,118206759,118231403,118226376,118221031,118208070,118232002,118206747,118228189,118219993,118235869,118236034,118226971,118216376,118237345,118233413,118230534,118231934,118233790,118231272,118211815,118228788,118226760,118218356,118212966,118230887,1182228…
GO:0010508	positive regulation of autophagy	biological_process	0.015315	0.47318	45	6525	126	24278	118227991,118233476,118230887,118224190,118222869,118217785,118208259,118218356,118212966,118231934,118233790,118231272,118211815,118228788,118226760,118228189,118206747,118219993,118235869,118226971,118236034,118230534,118233413,118216376,118237345,118206759,118226376,118231403,118221031,118232002,118208070,118237154,118210520,118232510,118216931,XLOC_265637,118208532,118221015,118220131,1182173…
GO:0031331	positive regulation of cellular catabolic process	biological_process	0.015315	0.47318	45	6525	126	24278	118210520,118232510,XLOC_265637,118216931,118208532,118237154,118217348,118221015,118220131,118237514,118231651,118233598,118211564,118237477,118219993,118235869,118228189,118206747,118233413,118230534,118237345,118216376,118236034,118226971,118226376,118231403,118206759,118232002,118208070,118221031,118218356,118212966,118233790,118231934,118228788,118211815,118226760,118231272,118233476,1182279…
GO:0005179	hormone activity	molecular_function	0.015356	0.47318	100	6525	307	24278	118236342,118222993,118208420,118210114,118235637,118213306,118213109,118231293,118218789,118229689,118224197,118212580,118216491,118236667,118231490,118213236,118217682,118232202,118211769,118234702,118235449,118211360,118215170,118214531,118221779,118229720,118215032,118223210,118207460,118235923,118215294,118229258,118213889,118212161,118230016,118218064,118226887,118212854,118236091,118219314…
GO:0015085	calcium ion transmembrane transporter activity	molecular_function	0.016344	0.4985	40	6525	105	24278	118221569,118214228,118212577,118228062,118214156,118225768,118212855,118217214,118210315,118214144,118213029,118206425,XLOC_168682,118213864,118216775,118236393,118209433,118229820,118215338,118214876,118222776,118222891,118234813,118234636,118219023,118222173,118209202,118231508,118210737,118232867,118235035,118211196,118208360,118207724,118225515,118213439,118230135,118216225,118235077,1182112…
GO:0005245	voltage-gated calcium channel activity	molecular_function	0.016387	0.4985	7	6525	11	24278	1.18222e+62
GO:0008378	galactosyltransferase activity	molecular_function	0.016555	0.50042	20	6525	48	24278	1.18215e+179
GO:0019028	viral capsid	cellular_component	0.017386	0.50866	190	6525	605	24278	118220123,118227591,118217032,118207481,118214010,118227079,118221474,118212195,118233347,118214790,118232297,118216422,118211564,118225068,118231764,118215428,118228522,118232581,118222556,118223119,118215164,118229273,118210895,118210742,118220427,118217785,118213730,118228248,118218299,118217901,118210871,118229252,118213843,118229820,118210579,118206392,118210915,118224835,118217691,118217906…
GO:0044456	synapse part	cellular_component	0.017496	0.50866	8	6525	14	24278	1.18207e+71
GO:0048786	presynaptic active zone	cellular_component	0.017496	0.50866	8	6525	14	24278	1.18212e+71
GO:0097458	neuron part	cellular_component	0.017496	0.50866	8	6525	14	24278	1.18232e+71
GO:0098793	presynapse	cellular_component	0.017496	0.50866	8	6525	14	24278	1.18207e+71
GO:0007601	visual perception	biological_process	0.01768	0.50866	6	6525	10	24278	1.18221e+53
GO:0030553	cGMP binding	molecular_function	0.01768	0.50866	6	6525	10	24278	1.18211e+53
GO:0050953	sensory perception of light stimulus	biological_process	0.01768	0.50866	6	6525	10	24278	1.18217e+53
GO:0015171	amino acid transmembrane transporter activity	molecular_function	0.018483	0.52858	20	6525	47	24278	1.18222e+179
GO:0015114	phosphate ion transmembrane transporter activity	molecular_function	0.019047	0.54107	7	6525	12	24278	1.18211e+62
GO:0016337	single organismal cell-cell adhesion	biological_process	0.019154	0.54107	12	6525	30	24278	1.18222e+107
GO:0008017	microtubule binding	molecular_function	0.019259	0.54107	54	6525	150	24278	118224275,118218729,118222334,118211101,118216538,118225567,118234871,118211930,118230421,118216422,118231651,118237560,118224900,118206359,118232940,118226025,118215775,118230534,118237345,118206350,118222763,118207689,118211129,118206865,118227878,118227650,118222786,118210491,118236281,118208504,118229878,118218356,118229280,118223723,118226760,118222522,118226266,118229962,118206358,118236446…
GO:0006595	polyamine metabolic process	biological_process	0.02004	0.55252	4	6525	5	24278	1.18209e+35
GO:0006596	polyamine biosynthetic process	biological_process	0.02004	0.55252	4	6525	5	24278	1.18206e+35
GO:0097164	ammonium ion metabolic process	biological_process	0.02004	0.55252	4	6525	5	24278	1.18206e+35
GO:0001733	galactosylceramide sulfotransferase activity	molecular_function	0.020263	0.55252	8	6525	14	24278	1.18212e+71
GO:0050694	galactose 3-O-sulfotransferase activity	molecular_function	0.020263	0.55252	8	6525	14	24278	1.18236e+71
GO:0006820	anion transport	biological_process	0.020361	0.55252	85	6525	254	24278	118235269,118207194,118225767,118228972,118234361,118232162,118236457,118231696,118206335,118229944,118207605,118210639,118206652,118226856,118217542,118216754,118225950,118211815,118223723,118217780,118235164,118224923,118228203,118221473,118222218,118232197,118227616,118211237,118213162,118215007,118224695,118223257,118207514,118233172,118225288,118212651,118222639,118229147,118217073,118229559…
GO:0032504	multicellular organism reproduction	biological_process	0.020508	0.55336	71	6525	204	24278	118226305,118208703,118225088,118207721,118235067,118219906,118232990,118231072,118217558,118233397,118221185,118211982,118215405,118211160,118208566,118220689,118234255,118222231,118226824,118222691,118212439,118228804,118225157,118207532,118226946,118210880,118206297,118216736,118217050,118211159,118223835,118220424,118222349,118210009,118218362,118217129,118209975,118220808,118220199,118226585…
GO:0048609	multicellular organismal reproductive process	biological_process	0.021667	0.5708	65	6525	186	24278	118214531,118225934,118217088,118231681,118213211,118220199,118226585,118211978,118231588,118218664,118226333,118211389,118235428,118216228,118208315,118211907,118223127,118207750,118209873,118219816,XLOC_283220,118216735,118235743,118219519,118227435,118235170,118236021,118206579,118212161,118220012,118227733,118219906,118232990,118208703,118225088,118226305,118207721,118235067,118208566,1182342…
GO:0015631	tubulin binding	molecular_function	0.021803	0.5708	63	6525	180	24278	118228841,118214099,118237112,118215393,118213181,118220738,118210635,118236333,118221492,118225839,118225311,118216804,118236446,118231944,118229265,118225851,118229962,118206358,118223723,118226760,118226266,118222522,118216497,118229878,118208504,118229280,118218356,118210491,118234730,118236281,118227650,118222786,118206865,118210353,118227878,118222763,118230618,118207689,118211129,118227079…
GO:0015018	galactosylgalactosylxylosylprotein 3-beta-glucuronosyltransferase activity	molecular_function	0.022065	0.5708	4	6525	5	24278	1.18235e+35
GO:0015020	glucuronosyltransferase activity	molecular_function	0.022065	0.5708	4	6525	5	24278	1.18218e+35
GO:0070402	NADPH binding	molecular_function	0.022133	0.5708	3	6525	3	24278	1.18219e+26
GO:0005262	calcium channel activity	molecular_function	0.022243	0.5708	37	6525	98	24278	118222891,118234813,118214876,118222776,118215338,118229820,118209433,118236393,118213864,118216775,XLOC_168682,118213029,118206425,118210315,118214144,118217214,118212855,118225768,118214156,118228062,118212577,118221569,118214228,118235077,118216225,118230135,118213439,118225515,118211196,118208360,118232867,118210737,118231508,118235035,118209202,118234636,118222173
GO:0048468	cell development	biological_process	0.022626	0.5708	56	6525	157	24278	118211907,118208315,118216736,118223835,118219816,118207532,118216182,118207750,118211130,118225636,118221326,118216735,118216422,118226946,118235743,118210880,118222349,118235170,118219519,118217129,118218362,118236021,118210009,118212161,118206579,118227733,118236206,118217196,118219906,118225934,118232096,118232990,118217088,118213211,118208703,118235067,118218664,118207402,118211978,118208566…
GO:0016533	cyclin-dependent protein kinase 5 holoenzyme complex	cellular_component	0.022695	0.5708	4	6525	5	24278	1.18214e+35
GO:0016534	cyclin-dependent protein kinase 5 activator activity	molecular_function	0.022695	0.5708	4	6525	5	24278	1.18216e+35
GO:0019209	kinase activator activity	molecular_function	0.022695	0.5708	4	6525	5	24278	1.1822e+35
GO:0030295	protein kinase activator activity	molecular_function	0.022695	0.5708	4	6525	5	24278	1.18216e+35
GO:0043539	protein serine/threonine kinase activator activity	molecular_function	0.022695	0.5708	4	6525	5	24278	1.18216e+35
GO:0006355	regulation of transcription, DNA-templated	biological_process	0.022827	0.5708	804	6525	2772	24278	118214918,118222779,118206914,118229553,118227205,118235385,118220565,118232763,118207950,118211632,118215400,118229550,118231061,118236547,118232937,118213014,118216433,118215006,118225179,118215693,118217691,118223802,118232357,118224081,118216267,118209044,118209433,118229360,118233775,118213715,118232581,118216799,118236371,118232878,118228386,118228301,118211351,118222967,118207527,118218064…
GO:1903506	regulation of nucleic acid-templated transcription	biological_process	0.022827	0.5708	804	6525	2772	24278	118229827,118229396,118211590,118226760,118218897,118229554,118236032,118212857,118210504,118219765,118232912,118222964,118224941,118219063,118206807,118233022,118217155,118237072,118212900,118211471,118233896,118227891,118212328,118210282,118237554,118206832,118214021,118211635,118215521,118210970,118230380,118214524,118230575,118229196,118223840,118217844,118229533,118221285,118236751,118212943…
GO:0016593	Cdc73/Paf1 complex	cellular_component	0.02299	0.57189	13	6525	27	24278	XLOC_168682,118233950,118223483,118213014,118233871,118236512,118214620,118215149,118232106,118229252,118217995,118222287,118230005
GO:0070206	protein trimerization	biological_process	0.023196	0.57401	24	6525	62	24278	118220534,118226971,118224279,118206211,118233985,118209318,118213306,118214010,118216641,118237385,118213804,118217042,118213172,118225886,118215164,118234730,118211930,118218466,118214249,118219842,XLOC_265637,118225737,118212752,118208647
GO:0010468	regulation of gene expression	biological_process	0.02362	0.5815	829	6525	2862	24278	118222594,118214264,118209856,118228377,118225097,118222525,118235389,118232299,118236654,118211615,118224947,118211265,118218995,118217019,118235285,118217556,118225163,118209418,118210963,118235890,118211823,118213415,118206726,118223032,118234405,118223880,118214066,118215746,118220984,118219748,118231362,118228188,118231974,118228313,118234233,118226370,118229291,118210237,118233561,118222349…
GO:0003779	actin binding	molecular_function	0.024251	0.59397	199	6525	622	24278	118220813,118219642,118216566,118214550,118219073,118214658,118227448,118231807,118224909,118217594,118212882,118214753,118208246,118212599,118235263,118213446,118215744,118227991,118210937,118231779,118223997,118223116,118207955,118237514,118219625,118207221,118213184,118234938,118211168,118212726,118226563,118234636,118232073,118206980,118213038,118232002,118232739,118230663,118233569,118210009…
GO:0031329	regulation of cellular catabolic process	biological_process	0.024387	0.59425	64	6525	191	24278	118231934,118228788,118226760,118211815,118208159,118231272,118214249,118218356,118212966,118210553,118212857,118229966,118222869,118227991,118224783,118237514,118228916,118231651,118233598,118223098,118232510,118214066,118237154,118211930,118217348,118221015,118233222,118235212,118232002,118208070,118221031,118211185,118219993,118228189,118233172,118206747,118233413,118237345,118216376,118226971…
GO:0009187	cyclic nucleotide metabolic process	biological_process	0.024708	0.59901	23	6525	55	24278	1.18217e+206
GO:0000003	reproduction	biological_process	0.025292	0.60405	141	6525	442	24278	118229242,118231403,118227733,118211407,118206931,118211203,118223589,118230534,118212161,118211960,118206579,118236021,118220012,118209908,118207750,118235794,118219816,118228141,XLOC_265637,118216931,118208315,118210583,118223127,118212971,118235428,118231613,118216228,118209698,118231588,118211978,118218664,118222209,118208869,118226333,118211389,118213267,118224160,118220808,118219059,1182312…
GO:0017108	5'-flap endonuclease activity	molecular_function	0.025608	0.60405	4	6525	5	24278	1.18224e+35
GO:0033557	Slx1-Slx4 complex	cellular_component	0.025608	0.60405	4	6525	5	24278	1.18215e+35
GO:0048256	flap endonuclease activity	molecular_function	0.025608	0.60405	4	6525	5	24278	1.18224e+35
GO:0006073	cellular glucan metabolic process	biological_process	0.025674	0.60405	12	6525	26	24278	1.18211e+107
GO:0044042	glucan metabolic process	biological_process	0.025674	0.60405	12	6525	26	24278	1.18233e+107
GO:2001141	regulation of RNA biosynthetic process	biological_process	0.026437	0.61257	804	6525	2777	24278	118229594,118236698,118218919,118206159,118224160,118233790,118233100,118231885,118222735,118225128,118219209,118208728,118208621,118235432,118228841,118209048,118210155,118232044,118219927,118236667,118229400,118220271,118208924,118226292,118208657,118237404,118232586,118219761,118221845,118212847,118236408,118225067,118213235,118225627,118227479,118234336,118232993,118233167,118231565,118207401…
GO:0006084	acetyl-CoA metabolic process	biological_process	0.02655	0.61257	4	6525	5	24278	1.18226e+35
GO:0006637	acyl-CoA metabolic process	biological_process	0.02655	0.61257	4	6525	5	24278	1.18234e+35
GO:0035383	thioester metabolic process	biological_process	0.02655	0.61257	4	6525	5	24278	1.18214e+35
GO:0060255	regulation of macromolecule metabolic process	biological_process	0.02691	0.6179	859	6525	2977	24278	118234410,118210749,118214274,118229121,118207242,118235485,118207931,118234473,118217042,118213804,118218890,118215170,118212592,118237126,118210806,118231185,118210871,118236425,118236342,118210233,118210948,118234295,118223022,118230210,118208384,118207490,118236750,118232769,118219787,118215187,118215431,118237406,118231343,118234820,118207269,118231772,118213412,118225142,118229197,118210520…
GO:0009975	cyclase activity	molecular_function	0.028374	0.6484	30	6525	78	24278	118209949,118234492,118236272,118209346,118219856,118211765,118209908,118209455,118209361,118210295,118222555,118229366,118237224,118232297,118209449,118224561,118227012,118219228,118234973,118209363,118216987,118218431,118223909,118209281,118217014,118228793,118212297,118207811,118232595,118233055
GO:0046872	metal ion binding	molecular_function	0.028544	0.64917	1326	6525	4601	24278	118228295,118235515,118232730,118214183,118213136,118223977,118217559,118210647,118206177,118213663,118226558,118221568,118231115,118225245,118208184,118236593,118221728,118208903,118214762,118225465,118229813,118212228,118207088,118210737,118208248,118220775,118216240,118233106,118236538,118219639,118213076,118209995,118217684,118235835,118226494,118218409,118233444,118212966,118234562,118231206…
GO:0019219	regulation of nucleobase-containing compound metabolic process	biological_process	0.029106	0.65882	810	6525	2802	24278	118224017,118223905,118230610,118225705,118209274,118216208,118207441,118207937,118231901,118226417,118212166,118235354,118214568,118233567,118211119,118226243,118217245,118233934,118230469,118224236,118233985,118223885,118235170,118207840,118208312,118218788,118216225,118213782,118224623,118226957,118217657,118225984,118218507,118212746,118236318,118234689,118229642,118217679,118234439,118230046…
GO:0051252	regulation of RNA metabolic process	biological_process	0.029683	0.66615	804	6525	2781	24278	118208202,118232915,118229898,118225486,118208647,118216416,118222564,118233944,118234719,118217981,118231398,118228062,118215208,118218463,118224909,118229054,118211709,118232991,118229961,118232004,118233095,118227210,118231337,118231099,118207342,118223989,118235763,118210084,118213135,118206486,118229009,118228406,118213184,118210908,118221881,118234294,118216591,118206245,118215205,118224078…
GO:0044423	virion part	cellular_component	0.029709	0.66615	277	6525	909	24278	118211237,118222531,118206285,118226971,118234318,118220697,118232490,118207436,118211823,118210094,118211930,118234858,118235589,118214066,118206213,118235389,118229330,118217995,118235408,118210777,118211265,118226431,118216232,118222594,118231047,118226692,118224274,118217693,118226826,118215483,118229657,118225118,118220897,118234701,118216564,118211653,118206211,118232922,118232361,118212176…
GO:0009190	cyclic nucleotide biosynthetic process	biological_process	0.030282	0.6716	21	6525	50	24278	1.18212e+188
GO:0005581	collagen trimer	cellular_component	0.030376	0.6716	22	6525	51	24278	1.18215e+197
GO:2000112	regulation of cellular macromolecule biosynthetic process	biological_process	0.030419	0.6716	816	6525	2826	24278	118208417,118209425,118223266,118218893,118226305,118222873,118234736,118216960,118229002,118220765,118220702,118214427,118232195,118235919,118210270,118212386,118236093,118213756,118235806,118221152,118237431,118219555,118217082,118207195,118207388,118211905,118222148,118213446,118224783,118218921,118222650,118208627,118227991,118227557,118219764,118210972,118214407,118223980,118225719,118234264…
GO:0046983	protein dimerization activity	molecular_function	0.030515	0.6716	168	6525	557	24278	118232933,118231430,118215934,118214462,118207206,118219937,118230279,118216804,118216722,118207544,118236748,118208728,118211342,118212572,118210583,XLOC_265637,118211013,118220633,118220131,118221644,118219775,118235794,118237477,118223589,118220783,118221001,118225492,118228208,118221459,118221912,118206579,118206759,118221129,118233291,118235842,118233258,118220177,118233167,118213808,1182183…
GO:0016849	phosphorus-oxygen lyase activity	molecular_function	0.031009	0.67936	32	6525	84	24278	118212297,118228793,118207811,118217014,118223909,118218431,118209363,118216987,118224561,118234973,118209361,118209455,118237224,118232297,118210295,118222555,118209908,118234492,118209949,118232595,118233055,118209281,118219228,118227012,118219851,118229366,118209449,118211765,118219856,118220888,118209346,118236272
GO:0043169	cation binding	molecular_function	0.031247	0.68145	1332	6525	4627	24278	118209304,118231094,118217995,118216375,118219226,118209560,118219274,118222295,118229004,118223962,118222374,118230215,118236164,118210781,118212194,118215483,118226689,118236643,118226288,118209897,118213139,118234249,118214148,118210147,118212591,118219928,118210446,118227450,118225894,118211444,118212207,118218367,118220217,118213805,118215614,118223333,118217664,118234977,118216808,118231106…
GO:0030551	cyclic nucleotide binding	molecular_function	0.031894	0.69038	6	6525	11	24278	1.18221e+53
GO:0009889	regulation of biosynthetic process	biological_process	0.031985	0.69038	818	6525	2835	24278	118233790,118224160,118206159,118218919,118236698,118229594,118219209,118222735,118225128,118231885,118233100,118228841,118235432,118208621,118208728,118236667,118219927,118232044,118210155,118209048,118236408,118212847,118221845,118219761,118232586,118237404,118226292,118208657,118208924,118229400,118220271,118234336,118227479,118225627,118213235,118225067,118230150,118220151,118207401,118233167…
GO:0009888	tissue development	biological_process	0.03209	0.69038	47	6525	132	24278	118227733,118237470,118235170,118206641,118222349,118219519,118218362,118206579,118212161,118211251,118210009,118207532,118219816,118207750,118226946,118216735,118210880,118235743,118210094,118208315,118211907,118216736,118223835,118221185,118235428,118212446,118233397,118216228,118218664,118231588,118211978,118208566,118234255,118212439,118222691,118211389,118234107,118210868,118208703,118235067…
GO:0008107	galactoside 2-alpha-L-fucosyltransferase activity	molecular_function	0.032574	0.69452	4	6525	5	24278	1.18208e+35
GO:0031127	alpha-(1,2)-fucosyltransferase activity	molecular_function	0.032574	0.69452	4	6525	5	24278	1.18234e+35
GO:0015103	inorganic anion transmembrane transporter activity	molecular_function	0.032917	0.69715	23	6525	59	24278	1.18218e+206
GO:0044421	extracellular region part	cellular_component	0.032989	0.69715	163	6525	539	24278	118221415,118225128,118221154,118222558,118212118,118212277,118218342,118229090,118226011,118218378,118222576,118212462,118223095,118225738,118230855,118233858,118225995,118237067,118218056,118220131,118225953,118213103,118216931,118217162,118234399,118222342,118231795,118221155,118206211,118207252,118216564,118235124,118231403,118228475,118223579,118229966,118236708,118237233,118224570,118215483…
GO:0052652	cyclic purine nucleotide metabolic process	biological_process	0.033705	0.70915	19	6525	45	24278	1.18224e+170
GO:0030286	dynein complex	cellular_component	0.034487	0.72197	12	6525	21	24278	1.18225e+107
GO:0051171	regulation of nitrogen compound metabolic process	biological_process	0.034647	0.72197	819	6525	2841	24278	118218299,118208038,118225277,XLOC_035840,118218428,118212987,118222134,118213863,118235833,118206392,118236491,118237162,118229931,118214027,118226163,118228761,118214966,118233430,118220147,118219108,118235713,118229166,118219721,118206253,118229279,118213172,118211941,118237483,118207344,118215527,118233312,118234427,118227763,118222804,118233371,118222550,118218895,118220775,118206817,1182245…
GO:0010556	regulation of macromolecule biosynthetic process	biological_process	0.034945	0.72197	816	6525	2831	24278	118232153,118231807,118213028,118231977,118228156,118209141,118215744,118219041,118237310,118222458,118220870,118216130,118225088,118227870,118237459,118229502,118225570,118206755,118234392,118218314,118229351,118233108,118228984,118208691,118216024,118215181,118223335,118210979,118217726,118220341,118232916,118227878,118237482,118223431,118226848,118220166,118233769,118217151,118208330,118209641…
GO:0031326	regulation of cellular biosynthetic process	biological_process	0.034945	0.72197	816	6525	2831	24278	118220341,118232916,118226848,118223431,118220166,118237482,118227878,118208330,118233769,118217151,118229784,118212919,118219931,118227092,118209641,118231586,118224221,118228462,118233433,118222365,118224841,118215029,118214293,118227132,118210672,118226320,118224093,118223098,118234468,118237154,118211270,118217910,118216850,118216135,118226200,118232153,118213028,118231977,118231807,118228156…
GO:0004000	adenosine deaminase activity	molecular_function	0.035071	0.72197	7	6525	13	24278	1.18216e+62
GO:0080090	regulation of primary metabolic process	biological_process	0.035739	0.73257	848	6525	2949	24278	118235485,118207242,118218890,118215170,118207931,118217042,118213804,118234473,118210749,118234410,118214274,118229121,118208384,118232769,118207490,118236750,118223022,118230210,118219787,118215187,118215431,118237406,118210806,118231185,118237126,118212592,118210233,118236342,118210948,118234295,118236425,118210871,118225142,118229197,118210520,118213412,118216018,118218322,118216556,118224868…
GO:0009894	regulation of catabolic process	biological_process	0.036679	0.7422	64	6525	195	24278	118235869,118230534,118226376,118231403,118206759,118210520,XLOC_265637,118208532,118216931,118222785,118220131,118211564,118237477,118233858,118230855,118233476,118207956,118230887,118208259,118217785,118224190,118225128,118233790,118219993,118228189,118206747,118233172,118233413,118237345,118216376,118236034,118226971,118232002,118208070,118221031,118211185,118232510,118214066,118223098,1182371…
GO:0005227	calcium activated cation channel activity	molecular_function	0.03683	0.7422	12	6525	26	24278	1.18219e+107
GO:0015269	calcium-activated potassium channel activity	molecular_function	0.03683	0.7422	12	6525	26	24278	1.18226e+107
GO:0022839	ion gated channel activity	molecular_function	0.03683	0.7422	12	6525	26	24278	1.1823e+107
GO:0016055	Wnt signaling pathway	biological_process	0.0388	0.77861	39	6525	110	24278	118216012,118232097,118220362,118210769,118208703,118214470,118232214,118221328,118225839,118211641,118207402,118224747,118232459,118228841,118221564,118222499,118231122,118210807,118209195,118210759,118218776,118224398,118234281,118214940,118222785,118214469,118231891,118222883,118211130,118214520,118210145,118219094,118207389,118217086,118207482,118206454,118207481,118234905,118226289
GO:0045502	dynein binding	molecular_function	0.041074	0.8208	42	6525	124	24278	118235869,118220534,118226971,118207182,118224279,118216376,118209728,118219227,118221578,118206759,118207403,118226370,118212714,118221032,118211930,118210583,118214066,118235779,XLOC_265637,118220131,118235794,118210672,118237477,118228301,118211265,118210449,118222134,118213722,118230887,118221235,118222869,118212572,118218356,118210553,118218466,118217042,118216933,118213172,118226544,1182177…
GO:0007276	gamete generation	biological_process	0.041706	0.82995	58	6525	170	24278	118211907,118208315,118216736,118223127,118223835,118211159,118219816,118207532,118209873,118228804,118225157,118207750,118226946,118216735,118210880,118235743,118235170,118227435,118222349,118219519,118218362,118217129,118220012,118206579,118212161,118210009,118236021,118227733,118231681,118217088,118219906,118232990,118225934,118213211,118220199,118226305,118225088,118208703,118226585,118235067…
GO:0000975	regulatory region DNA binding	molecular_function	0.043168	0.85195	15	6525	36	24278	1.18214e+134
GO:0001067	regulatory region nucleic acid binding	molecular_function	0.043168	0.85195	15	6525	36	24278	1.18233e+134
GO:0006869	lipid transport	biological_process	0.043352	0.85205	71	6525	221	24278	118216228,118217901,118210871,118225968,118236446,118217906,118225762,118222487,118233345,118226011,118230279,118217922,118216818,118216728,118221779,118231612,118221154,118209480,118216564,118229198,118217032,118220177,118228952,118225596,118209489,118221018,118223458,118223589,118232163,118221155,118233347,118217884,118222556,118207804,118212387,118209462,118225953,118237197,XLOC_265637,1182164…
GO:0019012	virion	cellular_component	0.044694	0.87438	294	6525	976	24278	118207481,118206394,118233347,118216812,118223119,118215164,118210737,118210742,118210895,118214434,118222562,118227287,118220427,118218299,118213730,118229820,118210579,118208184,118206392,118210915,118234647,118217906,118217657,118214548,118219179,118213172,118229387,118206253,118210788,118217291,118218466,118228230,118218739,118216167,118207403,118231067,118209641,118207034,118207182,118209414…
GO:0016757	transferase activity, transferring glycosyl groups	molecular_function	0.044854	0.87438	139	6525	448	24278	118232199,118221262,118232328,118237443,118216039,118236574,118206627,118215556,118234092,118207666,118224570,118221334,118213361,118217995,118237554,118224188,118230472,118210905,118214444,118228416,118207563,118235058,118210970,118212257,118237263,118217733,118224719,118231096,118230806,118231688,118209113,118233818,118222861,118234825,118214948,118227846,118215032,118237161,118229105,118215387…
GO:0010876	lipid localization	biological_process	0.045169	0.87694	81	6525	254	24278	118229992,118228956,118223851,118233358,118209467,118221081,118225489,118234358,118234599,118233356,118207403,118229527,118207182,118219931,118223472,118233769,118228882,118228880,118234363,118209461,118228984,118225293,118209450,118210979,118216663,118221152,118215405,118234361,118227932,118209189,118232162,118223207,118206335,118229021,118214611,118224937,118207605,118217884,118225953,118209462…
GO:0015077	monovalent inorganic cation transmembrane transporter activity	molecular_function	0.045995	0.88936	209	6525	690	24278	118235894,118210636,118224805,118234318,118221542,118226153,118208037,118227104,118213439,118210440,118218443,118210970,118233684,118226206,118221878,118224820,118234512,118234358,118219023,118224254,118219293,118229275,118216079,118214659,118211426,118213219,118208201,118231947,118235638,118219229,118217019,118231176,118232566,118207271,118231272,118231630,118216754,118228829,118217403,118233741…
GO:0098602	single organism cell adhesion	biological_process	0.046872	0.89437	12	6525	33	24278	1.18214e+107
GO:0008406	gonad development	biological_process	0.047275	0.89437	4	6525	6	24278	1.18225e+35
GO:0045137	development of primary sexual characteristics	biological_process	0.047275	0.89437	4	6525	6	24278	1.1822e+35
GO:0048608	reproductive structure development	biological_process	0.047275	0.89437	4	6525	6	24278	1.1822e+35
GO:0061458	reproductive system development	biological_process	0.047275	0.89437	4	6525	6	24278	1.18218e+35
GO:0006270	DNA replication initiation	biological_process	0.047573	0.89437	49	6525	143	24278	118228003,118232350,118216591,118227125,118207299,118212213,118230348,118213439,118222763,118216225,118235763,118207532,118237514,118237524,118223690,118225320,118228191,118222507,118211535,118219447,118233344,118214885,118210872,118226564,118217995,118225767,118211342,118229252,118213966,118225277,118210981,118216065,118230316,118209859,118236696,118213014,118207754,118212337,118212855,118225778…
GO:0003950	NAD+ ADP-ribosyltransferase activity	molecular_function	0.047885	0.89437	19	6525	48	24278	1.18223e+170
GO:0005342	organic acid transmembrane transporter activity	molecular_function	0.04794	0.89437	29	6525	79	24278	118215332,118225369,118232197,118228864,118234374,118215007,118208184,118224695,118218352,118223257,118229944,118226737,118222574,118232898,118215926,118226460,118226856,118216754,118231279,118223723,118229147,118217073,118221910,118231493,118215427,118209229,118226206,118228203,118222218
GO:0046943	carboxylic acid transmembrane transporter activity	molecular_function	0.04794	0.89437	29	6525	79	24278	118216754,118231279,118223723,118217073,118229147,118221910,118209229,118215427,118226206,118231493,118228203,118222218,118232197,118215332,118225369,118228864,118234374,118224695,118208184,118215007,118229944,118223257,118218352,118215926,118222574,118226737,118232898,118226460,118226856
GO:0019087	transformation of host cell by virus	biological_process	0.049905	0.92742	17	6525	42	24278	1.18219e+152
GO:0008146	sulfotransferase activity	molecular_function	0.051662	0.95635	33	6525	94	24278	118212246,118209495,118235767,118217787,118230192,118218017,118225627,118226729,118209032,118214899,118235878,118237321,118214133,118215069,118208802,118217763,118236021,118227749,118233950,118222596,118214751,118215472,118217136,118222734,118227506,118216237,118235237,118218774,118206942,118232117,118212355,118219724,118222506
GO:0016790	thiolester hydrolase activity	molecular_function	0.052067	0.96012	3	6525	4	24278	1.18218e+26
GO:0007166	cell surface receptor signaling pathway	biological_process	0.052611	0.96643	97	6525	300	24278	118211984,118207482,118207389,118225638,118207689,118225328,118219094,118210145,118226789,118233796,118210325,118232710,118234905,118208251,118206447,118208868,118227382,118207481,118222785,118223005,118214940,118210445,118218776,118234281,118232369,118229813,118222883,118214654,118230210,118225839,118222499,118226557,118210807,118233039,118222737,118236343,118221564,118214387,118228841,118224250…
GO:0000796	condensin complex	cellular_component	0.054273	0.97676	3	6525	4	24278	1.18225e+26
GO:0007076	mitotic chromosome condensation	biological_process	0.054273	0.97676	3	6525	4	24278	1.18214e+26
GO:0005922	connexon complex	cellular_component	0.054927	0.97676	2	6525	2	24278	1.18214e+17
GO:0007517	muscle organ development	biological_process	0.055673	0.97676	5	6525	9	24278	1.18215e+44
GO:0061061	muscle structure development	biological_process	0.055673	0.97676	5	6525	9	24278	1.18217e+44
GO:0009309	amine biosynthetic process	biological_process	0.056273	0.97676	4	6525	6	24278	1.18209e+35
GO:0042401	cellular biogenic amine biosynthetic process	biological_process	0.056273	0.97676	4	6525	6	24278	1.18224e+35
GO:0004435	phosphatidylinositol phospholipase C activity	molecular_function	0.056728	0.97676	13	6525	28	24278	1.18211e+116
GO:0004629	phospholipase C activity	molecular_function	0.056728	0.97676	13	6525	28	24278	1.18208e+116
GO:0001614	purinergic nucleotide receptor activity	molecular_function	0.056737	0.97676	5	6525	9	24278	1.18207e+44
GO:0004931	extracellular ATP-gated cation channel activity	molecular_function	0.056737	0.97676	5	6525	9	24278	1.18207e+44
GO:0014074	response to purine-containing compound	biological_process	0.056737	0.97676	5	6525	9	24278	1.18207e+44
GO:0016502	nucleotide receptor activity	molecular_function	0.056737	0.97676	5	6525	9	24278	1.18207e+44
GO:0033198	response to ATP	biological_process	0.056737	0.97676	5	6525	9	24278	1.1821e+44
GO:0035381	ATP-gated ion channel activity	molecular_function	0.056737	0.97676	5	6525	9	24278	1.18207e+44
GO:0035586	purinergic receptor activity	molecular_function	0.056737	0.97676	5	6525	9	24278	1.18207e+44
GO:0046683	response to organophosphorus	biological_process	0.056737	0.97676	5	6525	9	24278	1.18207e+44
GO:0004127	cytidylate kinase activity	molecular_function	0.05692	0.97676	10	6525	23	24278	1.1823e+89
GO:0003333	amino acid transmembrane transport	biological_process	0.057074	0.97676	19	6525	49	24278	1.18222e+170
GO:0008514	organic anion transmembrane transporter activity	molecular_function	0.057816	0.97676	30	6525	83	24278	118215926,118232898,118226737,118222574,118226856,118226460,118208184,118224695,118215007,118229944,118223257,118218352,118236457,118228864,118234374,118232197,118225369,118215332,118228203,118222218,118215427,118209229,118226206,118231493,118217073,118229147,118221910,118216754,118231279,118223723
GO:0032797	SMN complex	cellular_component	0.057923	0.97676	5	6525	9	24278	1.18211e+44
GO:0000390	spliceosomal complex disassembly	biological_process	0.058491	0.97676	4	6525	6	24278	1.18211e+35
GO:0005684	U2-type spliceosomal complex	cellular_component	0.058491	0.97676	4	6525	6	24278	1.18229e+35
GO:0032988	ribonucleoprotein complex disassembly	biological_process	0.058491	0.97676	4	6525	6	24278	1.18213e+35
GO:0071008	U2-type post-mRNA release spliceosomal complex	cellular_component	0.058491	0.97676	4	6525	6	24278	1.18229e+35
GO:0071014	post-mRNA release spliceosomal complex	cellular_component	0.058491	0.97676	4	6525	6	24278	1.18229e+35
GO:0006865	amino acid transport	biological_process	0.05873	0.97733	21	6525	55	24278	1.18232e+188
GO:0045202	synapse	cellular_component	0.060057	0.99594	15	6525	35	24278	1.18229e+134
GO:0019988	charged-tRNA amino acid modification	biological_process	0.060974	1	10	6525	23	24278	1.18225e+89
GO:0043399	tRNA A64-2'-O-ribosylphosphate transferase activity	molecular_function	0.060974	1	10	6525	23	24278	1.18218e+89
GO:0046873	metal ion transmembrane transporter activity	molecular_function	0.060978	1	250	6525	843	24278	118236216,118207403,118224731,118237470,118230536,118216856,118233356,118218525,118230135,118207069,118222763,118224860,118217129,118214371,118216376,118219855,118217316,118211454,118222365,118224212,118209202,118234636,118213833,118231671,118234462,118233358,118217910,118218827,118209634,118208322,118222891,118225767,118208281,118208964,118230406,118206425,118219709,118232936,118237140,118225084…
GO:0002253	activation of immune response	biological_process	0.061918	1	9	6525	20	24278	1.18214e+80
GO:0048870	cell motility	biological_process	0.063719	1	60	6525	183	24278	118216931,XLOC_265637,118214066,118237154,118209172,118226103,118226944,118225213,118222604,118225719,118211690,118237514,118228406,118209908,118209590,118223989,XLOC_283220,118229533,118233219,118231328,118223333,118232940,118218443,118206359,118225992,118206747,118223589,118237345,118226210,118212919,118218108,118220534,118230594,118231403,118219227,118209690,118221032,118212714,118231797,11821…
GO:0051674	localization of cell	biological_process	0.063719	1	60	6525	183	24278	118223772,118214249,118210784,118235449,118223335,118212857,118211234,118216428,118207245,118207682,118229388,118217691,118211265,118230855,118228853,118212599,118213306,118230887,118208077,118217785,118237154,118214066,118216931,XLOC_265637,118226103,118226944,118209172,118223989,118237514,118209590,118211690,118209908,118228406,118222604,118225719,118225213,118232940,118223333,118206359,1182184…
GO:0006383	transcription from RNA polymerase III promoter	biological_process	0.066303	1	20	6525	52	24278	118220428,118224941,118217995,118232350,118214027,118235219,118226887,118222763,118233950,118206392,118216225,118223483,XLOC_168682,118214144,118214375,118210270,118223423,118232358,118233344,118225768
GO:0016503	pheromone receptor activity	molecular_function	0.067304	1	11	6525	28	24278	1.18212e+98
GO:0015081	sodium ion transmembrane transporter activity	molecular_function	0.067414	1	57	6525	169	24278	118228254,118232096,118232781,118220143,118228203,118216712,118210595,118216728,118233741,118219704,118222458,118214564,118209639,118212406,118227069,118216754,118209633,118231027,118215926,118208355,118219229,118209634,118216851,118209635,118213219,118208281,118233685,118225369,118219023,118224254,118227329,118209643,118226206,118224820,118223119,118221910,118210970,118227629,118233684,118226778…
GO:0043570	maintenance of DNA repeat elements	biological_process	0.067966	1	3	6525	4	24278	1.18219e+26
GO:0043571	maintenance of CRISPR repeat elements	biological_process	0.067966	1	3	6525	4	24278	1.18232e+26
GO:0008023	transcription elongation factor complex	cellular_component	0.068472	1	16	6525	40	24278	118215358,118211788,118230005,118215149,118233871,118214620,118222287,118234279,118217995,118232106,118229252,118236512,118233950,118223483,118213014,XLOC_168682
GO:0010383	cell wall polysaccharide metabolic process	biological_process	0.068654	1	2	6525	2	24278	1.18222e+17
GO:0010410	hemicellulose metabolic process	biological_process	0.068654	1	2	6525	2	24278	1.18234e+17
GO:0045491	xylan metabolic process	biological_process	0.068654	1	2	6525	2	24278	1.18234e+17
GO:0045493	xylan catabolic process	biological_process	0.068654	1	2	6525	2	24278	1.18222e+17
GO:0046559	alpha-glucuronidase activity	molecular_function	0.068654	1	2	6525	2	24278	1.18234e+17
GO:0009445	putrescine metabolic process	biological_process	0.069048	1	2	6525	2	24278	1.18225e+17
GO:0009446	putrescine biosynthetic process	biological_process	0.069048	1	2	6525	2	24278	1.18225e+17
GO:0004568	chitinase activity	molecular_function	0.069121	1	3	6525	4	24278	1.18221e+26
GO:0098656	anion transmembrane transport	biological_process	0.071116	1	21	6525	56	24278	1.18222e+188
GO:1903825	organic acid transmembrane transport	biological_process	0.072257	1	20	6525	53	24278	1.18234e+179
GO:0043772	acyl-phosphate glycerol-3-phosphate acyltransferase activity	molecular_function	0.072726	1	2	6525	2	24278	1.18237e+17
GO:0015099	nickel cation transmembrane transporter activity	molecular_function	0.074274	1	11	6525	26	24278	1.1823e+98
GO:0015675	nickel cation transport	biological_process	0.074274	1	11	6525	26	24278	1.1823e+98
GO:0035444	nickel cation transmembrane transport	biological_process	0.074274	1	11	6525	26	24278	1.18217e+98
GO:0005488	binding	molecular_function	0.074622	1	4394	6525	15959	24278	118219196,118224998,118235589,118211268,118215993,118211196,118228536,118213469,118214444,118214520,118217108,118230459,118227104,118225914,118217733,118230029,118208736,118206848,118211269,118222130,118215121,118226976,118224273,118221204,118218340,118235572,118222869,118208732,118212609,118232029,118224168,118207429,118232017,118213954,118222555,118218931,118212218,118232225,118208509,118217095…
2,118216027,118212379,118223472,118228781,118233705,118225126,118223257,118227365,118226971,118211237,118209546,118226411,118234885,118208606,118230219,118231844,118229657,118215146,118209461,118215590,118231272,118207245,118222522,118213107,118217608,118211574,118228181,118225797,118218683,118230338,118210583,118223784,118231508,118230986,118210797,118214799,118219253,118216101,118233258,1182200…
GO:0004383	guanylate cyclase activity	molecular_function	0.074904	1	14	6525	34	24278	1.18223e+125
GO:0006182	cGMP biosynthetic process	biological_process	0.074904	1	14	6525	34	24278	1.1821e+125
GO:0046068	cGMP metabolic process	biological_process	0.074904	1	14	6525	34	24278	1.18235e+125
GO:0018492	carbon-monoxide dehydrogenase (acceptor) activity	molecular_function	0.075328	1	3	6525	4	24278	1.18213e+26
GO:0008907	integrase activity	molecular_function	0.075831	1	2	6525	2	24278	1.18209e+17
GO:0008883	glutamyl-tRNA reductase activity	molecular_function	0.077805	1	6	6525	12	24278	1.18237e+53
GO:0048306	calcium-dependent protein binding	molecular_function	0.078177	1	2	6525	2	24278	1.18231e+17
GO:0007126	meiotic nuclear division	biological_process	0.079342	1	14	6525	37	24278	1.18217e+125
GO:1903046	meiotic cell cycle process	biological_process	0.079342	1	14	6525	37	24278	1.18229e+125
GO:0016458	gene silencing	biological_process	0.079759	1	8	6525	17	24278	1.1821e+71
GO:0015105	arsenite transmembrane transporter activity	molecular_function	0.080159	1	2	6525	2	24278	1.18232e+17
GO:0015700	arsenite transport	biological_process	0.080159	1	2	6525	2	24278	1.18232e+17
GO:0006814	sodium ion transport	biological_process	0.080728	1	47	6525	138	24278	118214454,118216956,118214468,118221040,118207668,118219062,118237156,118208098,118207440,118229076,118235894,118232185,118227329,118224254,118227217,118213017,118223119,118224820,118226206,118223503,118219236,118221910,118222365,118234714,XLOC_090711,118210930,118226778,118220064,118231027,118213219,118222815,118216851,118209248,118207143,118208281,118216712,118220143,118232096,118228254,1182167…
GO:0043565	sequence-specific DNA binding	molecular_function	0.080756	1	215	6525	722	24278	118235212,118217062,118225965,118228313,118206818,118220918,118214066,118219748,118223304,118213415,118223032,118214141,118206726,118223840,118234405,118229533,118230575,118214524,118224233,118215775,118216987,118227365,118208306,118233561,118234206,118226370,118211185,118230409,118219227,118206929,118213006,118215658,118234233,118207349,118207451,118208462,118221784,118210504,118221416,118211928…
GO:0048013	ephrin receptor signaling pathway	biological_process	0.080802	1	11	6525	25	24278	1.18214e+98
GO:0005138	interleukin-6 receptor binding	molecular_function	0.081137	1	4	6525	7	24278	1.1821e+35
GO:0044036	cell wall macromolecule metabolic process	biological_process	0.081371	1	6	6525	12	24278	1.18228e+53
GO:0015698	inorganic anion transport	biological_process	0.081872	1	31	6525	90	24278	118225288,118225950,118222639,118211815,118208510,118229559,118233609,118226755,118217780,118222334,118229163,118235035,118235164,118226074,118224923,118221473,118234982,118235269,118207194,118210909,118228972,118232162,118222815,118210950,118225686,118218189,118223257,118207514,118210639,118216683,118216534
GO:0006582	melanin metabolic process	biological_process	0.082797	1	4	6525	7	24278	1.18209e+35
GO:0042438	melanin biosynthetic process	biological_process	0.082797	1	4	6525	7	24278	1.18209e+35
GO:0046189	phenol-containing compound biosynthetic process	biological_process	0.082797	1	4	6525	7	24278	1.18209e+35
GO:0042546	cell wall biogenesis	biological_process	0.083026	1	8	6525	17	24278	1.18235e+71
GO:0019956	chemokine binding	molecular_function	0.084669	1	2	6525	2	24278	1.18234e+17
GO:0033014	tetrapyrrole biosynthetic process	biological_process	0.084955	1	42	6525	125	24278	118210090,118232883,118221380,118225420,118208504,118220814,118226421,118214464,118209950,118213014,118215706,XLOC_168682,118214939,118228043,118228296,118237072,118210027,118227287,118217261,118216641,118208454,118217995,118209514,118206714,118226261,118208295,118237154,118230427,118235804,118236711,118234358,118235552,118213071,118219761,118223959,118225983,118214698,118234036,118222763,1182321…
GO:0007017	microtubule-based process	biological_process	0.086316	1	95	6525	301	24278	118229533,118206359,118224900,118237560,118218366,118218729,118217743,118222334,118211101,118233201,118230421,118235272,118211930,118206865,118236186,118227878,118221031,118234669,118227650,118219227,118209690,118222786,118206350,118215775,118222763,118211856,118236733,118211817,118223723,118226760,118231272,118229402,118222522,118229962,118236281,118229878,118214249,118206608,118228062,118218356…
GO:0010256	endomembrane system organization	biological_process	0.087046	1	31	6525	93	24278	118213440,118207519,118215779,118217309,118210552,118232414,118226818,118208348,118213701,118208108,118219041,118211389,118210626,118226460,118211265,118228190,118235161,118208364,118226760,118216110,118234460,118227073,118212857,118224500,118226544,118221644,118211630,118220984,118213087,118235913,118231681
GO:0005451	monovalent cation:proton antiporter activity	molecular_function	0.08717	1	4	6525	6	24278	1.18211e+35
GO:0015491	cation:cation antiporter activity	molecular_function	0.08717	1	4	6525	6	24278	1.18235e+35
GO:0030178	negative regulation of Wnt signaling pathway	biological_process	0.087538	1	6	6525	13	24278	1.18215e+53
GO:0031988	membrane-bounded vesicle	cellular_component	0.08808	1	46	6525	141	24278	118227092,118223875,118229085,118216280,118230990,118229582,118211781,118230630,118223073,118229879,118221644,118235779,118215477,118210619,118213022,118226778,118210359,118213204,118221933,118234343,118221801,118206817,118236639,118231437,118208184,118229150,118209859,118220689,118235388,118222891,118223881,118213968,118219009,118235390,118230244,118215697,118224348,118224234,118208847,118211947…
GO:0044462	external encapsulating structure part	cellular_component	0.088174	1	13	6525	33	24278	1.18233e+116
GO:0016023	cytoplasmic membrane-bounded vesicle	cellular_component	0.089116	1	45	6525	138	24278	118211781,118229582,118230990,118216280,118229879,118223073,118230630,118223875,118227092,118229085,118234343,118221801,118221933,118226778,118210359,118213204,118221644,118213022,118235779,118210619,118215477,118222891,118223881,118231437,118208184,118236639,118235388,118229150,118220689,118209859,118211568,118208847,118224234,118211947,118231506,118219845,118208238,118226277,118235866,118235390…
GO:0019901	protein kinase binding	molecular_function	0.089199	1	19	6525	53	24278	1.18223e+170
GO:0003677	DNA binding	molecular_function	0.090073	1	965	6525	3424	24278	118209044,118229360,118224950,118224081,118216187,118229252,118236620,118214143,118217898,118225179,118215006,118213014,118216433,118206358,118236547,118229550,118211632,118219368,118231112,118220565,118211217,118229553,118234467,118235449,118227205,118219502,118214918,118211353,118232895,118222779,118224733,118225215,118213238,118233245,118211271,118213339,118223458,118223597,118237583,118216615…
GO:0030154	cell differentiation	biological_process	0.090815	1	79	6525	249	24278	118236206,118211856,118237246,118222349,118210009,118217129,118218362,118223263,118207532,118216182,118226946,118210880,118219192,118211130,118216736,118223835,118233397,118231072,118231094,118221185,118217167,118234255,118208566,118207402,118212222,118209159,118224517,118222691,118225851,118212439,118208703,118215240,118235067,118219906,118232990,118217196,118216712,118227748,118230200,118229733…
GO:0006368	transcription elongation from RNA polymerase II promoter	biological_process	0.091112	1	19	6525	51	24278	118213339,118232106,118229252,118218435,118234279,118222287,118227762,118217995,118233950,118213014,118223483,XLOC_168682,118236512,118215149,118230005,118211788,118215358,118233871,118214620
GO:0019900	kinase binding	molecular_function	0.091256	1	21	6525	59	24278	1.1822e+188
GO:0006354	DNA-templated transcription, elongation	biological_process	0.09175	1	20	6525	54	24278	118215149,118230005,118211788,118215358,118214620,118233871,118218435,118213339,118232106,118229252,118217995,118227762,118222287,118234279,XLOC_168682,118223483,118213014,118233950,118231299,118236512
GO:0015098	molybdate ion transmembrane transporter activity	molecular_function	0.092815	1	4	6525	7	24278	1.18218e+35
GO:0015689	molybdate ion transport	biological_process	0.092815	1	4	6525	7	24278	1.18235e+35
GO:0006261	DNA-dependent DNA replication	biological_process	0.092903	1	53	6525	163	24278	118233344,118214885,118211535,118219447,118237524,118223690,118225320,118228191,118222507,118235763,118207532,118237514,118217217,118216225,118212213,118215497,118207299,118230348,118223597,118222763,118213439,118216591,118232350,118227125,118228003,118222779,118209547,118214620,118212746,118212577,118211941,118230215,118235261,118220813,118237513,118207754,118212337,118212855,118225778,118213014…
GO:0042803	protein homodimerization activity	molecular_function	0.093531	1	46	6525	145	24278	118216768,118226760,118222594,118217042,118216933,118213172,118226544,118217776,118218356,118210553,118218466,118222869,118212572,118216038,118230887,118221235,118210449,118222134,118213722,118211265,118210672,118237477,118228301,118235794,118220131,118211930,118210583,118235779,118214066,XLOC_265637,118226370,118212714,118221032,118209728,118206759,118219227,118221578,118207403,118220534,1182071…
GO:0005201	extracellular matrix structural constituent	molecular_function	0.093718	1	22	6525	57	24278	1.18213e+197
GO:0015145	monosaccharide transmembrane transporter activity	molecular_function	0.093718	1	2	6525	2	24278	1.18237e+17
GO:0015149	hexose transmembrane transporter activity	molecular_function	0.093718	1	2	6525	2	24278	1.18213e+17
GO:0015153	rhamnose transmembrane transporter activity	molecular_function	0.093718	1	2	6525	2	24278	1.18237e+17
GO:0007218	neuropeptide signaling pathway	biological_process	0.094753	1	24	6525	68	24278	1.18234e+215
GO:0031047	gene silencing by RNA	biological_process	0.095139	1	7	6525	15	24278	1.18218e+62
GO:0005272	sodium channel activity	molecular_function	0.097026	1	14	6525	34	24278	1.18215e+125
GO:0001948	glycoprotein binding	molecular_function	0.098598	1	9	6525	21	24278	1.18223e+80
GO:0043394	proteoglycan binding	molecular_function	0.098598	1	9	6525	21	24278	1.18226e+80
GO:0043395	heparan sulfate proteoglycan binding	molecular_function	0.098598	1	9	6525	21	24278	1.18226e+80
GO:0008138	protein tyrosine/serine/threonine phosphatase activity	molecular_function	0.10006	1	47	6525	143	24278	118217694,118221801,118208044,118213718,118230608,118231021,118222742,118222967,118214951,118234132,118234867,118225026,118227379,118218088,118206818,118211327,118224731,118234881,118209442,118234757,118206412,118227791,118210864,118214064,118229467,118211951,118226102,118234317,118227623,118207977,118227313,118226898,118215237,118216383,118221044,118233668,118234509,118235777,118224667,118219141…
GO:0030313	cell envelope	cellular_component	0.10038	1	15	6525	40	24278	1.18222e+134
GO:0004222	metalloendopeptidase activity	molecular_function	0.10175	1	74	6525	236	24278	118212780,118227636,118209103,118216737,118220103,118212235,118211016,118208587,118207271,118219552,118226692,118224833,118207117,118230345,118234247,118211492,118224400,118229213,118236217,118216808,118221100,118231028,118230454,118226695,118232490,118224902,118213402,118215256,118214695,118220611,118212207,118210285,118234709,118235729,118223692,118216932,118206620,118226791,118210446,118232304…
GO:0003013	circulatory system process	biological_process	0.10256	1	11	6525	28	24278	1.18236e+98
GO:0003018	vascular process in circulatory system	biological_process	0.10256	1	11	6525	28	24278	1.18219e+98
GO:0008015	blood circulation	biological_process	0.10256	1	11	6525	28	24278	1.18212e+98
GO:0035150	regulation of tube size	biological_process	0.10256	1	11	6525	28	24278	1.18212e+98
GO:0050880	regulation of blood vessel size	biological_process	0.10256	1	11	6525	28	24278	1.18236e+98
GO:1903522	regulation of blood circulation	biological_process	0.10256	1	11	6525	28	24278	1.18229e+98
GO:0016782	transferase activity, transferring sulfur-containing groups	molecular_function	0.10495	1	37	6525	113	24278	118214133,118208802,118215069,118235878,118237321,118214899,118226729,118209032,118222596,118233950,118219645,118217763,118236021,118227749,118235767,118209495,118212246,118225627,118230192,118218017,118217787,118225965,118219724,118226359,118212355,118232117,118206942,118222506,118209698,118216237,118227506,118222734,118215472,118217136,118214751,118218774,118235237
GO:0042802	identical protein binding	molecular_function	0.10583	1	57	6525	183	24278	118207403,118206759,118219227,118221578,118209728,118212714,118221032,118226370,118235869,118206747,118223589,118224279,118227079,118216376,118226971,118207182,118220534,118235794,118206488,118228301,118237477,118210672,XLOC_265637,118214066,118235779,118210583,118211930,118235363,118220131,118217015,118221235,118234006,118230887,118216038,118212572,118222869,118225836,118211265,118231053,1182137…
GO:0005044	scavenger receptor activity	molecular_function	0.10637	1	27	6525	78	24278	118217723,118236563,118219858,118221750,118212648,118207730,118220427,118219853,118212981,118220420,118217717,118224572,118208365,118206231,118219856,118209714,118207725,118217678,118220376,118219716,118225236,118210863,118207721,118226966,118220424,118210127,118223199
GO:0038024	cargo receptor activity	molecular_function	0.10637	1	27	6525	78	24278	118212981,118220420,118224572,118208365,118217717,118219853,118220427,118207730,118221750,118212648,118217723,118236563,118219858,118223199,118210127,118220424,118226966,118207721,118210863,118225236,118219716,118219856,118206231,118209714,118217678,118220376,118207725
GO:0000149	SNARE binding	molecular_function	0.10638	1	12	6525	31	24278	1.18237e+107
GO:0019905	syntaxin binding	molecular_function	0.10638	1	12	6525	31	24278	1.1821e+107
GO:0006855	drug transmembrane transport	biological_process	0.10701	1	6	6525	13	24278	1.18208e+53
GO:0015893	drug transport	biological_process	0.10701	1	6	6525	13	24278	1.18208e+53
GO:0002684	positive regulation of immune system process	biological_process	0.10713	1	9	6525	22	24278	1.18235e+80
GO:0050778	positive regulation of immune response	biological_process	0.10713	1	9	6525	22	24278	1.18214e+80
GO:0001682	tRNA 5'-leader removal	biological_process	0.10755	1	3	6525	5	24278	1.18215e+26
GO:0005911	cell-cell junction	cellular_component	0.1088	1	10	6525	25	24278	1.18218e+89
GO:0004668	protein-arginine deiminase activity	molecular_function	0.10944	1	6	6525	13	24278	1.18211e+53
GO:0016788	hydrolase activity, acting on ester bonds	molecular_function	0.11132	1	396	6525	1357	24278	118225553,118225128,118221039,118206571,118218690,118214713,118219051,118208238,118232307,118218730,118214145,118231326,118221838,118224715,118233805,118225968,118226103,118212928,118211575,118210445,118234415,118211466,118221644,118208731,118235023,118219486,118218425,118236115,118217884,118217694,118237477,118228141,118210608,118217217,118229407,118211960,118233414,118227791,118207347,118231795…
GO:0005795	Golgi stack	cellular_component	0.11138	1	10	6525	24	24278	1.18229e+89
GO:0005929	cilium	cellular_component	0.11227	1	40	6525	124	24278	118232940,118218443,118206359,118229533,118223989,118225719,118225213,118209590,118209908,118226944,118237154,118216931,118214066,118231797,118228772,118221032,118212714,118219227,118231403,118230594,118220534,118212919,118226210,118237345,118218108,118206747,118207682,118211234,118223335,118212857,118208976,118214249,118235585,118208077,118217785,118230887,118212599,118230855,118229388,118211265
GO:0042138	meiotic DNA double-strand break formation	biological_process	0.11243	1	3	6525	5	24278	1.18225e+26
GO:0047396	glycosylphosphatidylinositol diacylglycerol-lyase activity	molecular_function	0.11249	1	11	6525	28	24278	1.18227e+98
GO:0002694	regulation of leukocyte activation	biological_process	0.11293	1	3	6525	5	24278	1.18231e+26
GO:0050865	regulation of cell activation	biological_process	0.11293	1	3	6525	5	24278	1.18222e+26
GO:0051249	regulation of lymphocyte activation	biological_process	0.11293	1	3	6525	5	24278	1.18211e+26
GO:0000178	exosome (RNase complex)	cellular_component	0.11781	1	7	6525	16	24278	1.18209e+62
GO:0070588	calcium ion transmembrane transport	biological_process	0.11811	1	11	6525	24	24278	1.18236e+98
GO:0016863	intramolecular oxidoreductase activity, transposing C=C bonds	molecular_function	0.11867	1	5	6525	10	24278	1.18208e+44
GO:0031514	motile cilium	cellular_component	0.11912	1	38	6525	118	24278	118212599,118230855,118229388,118211265,118217785,118208077,118230887,118212857,118223335,118214249,118207682,118211234,118220534,118212919,118226210,118237345,118218108,118206747,118231797,118228772,118221032,118212714,118219227,118230594,118231403,118226944,118237154,118216931,118214066,118206359,118232940,118218443,118229533,118223989,118225213,118225719,118209590,118209908
GO:0007605	sensory perception of sound	biological_process	0.11918	1	3	6525	5	24278	1.18225e+26
GO:0050954	sensory perception of mechanical stimulus	biological_process	0.11918	1	3	6525	5	24278	1.18225e+26
GO:0042302	structural constituent of cuticle	molecular_function	0.11955	1	8	6525	19	24278	1.18226e+71
GO:0030865	cortical cytoskeleton organization	biological_process	0.12012	1	5	6525	10	24278	1.18231e+44
GO:0030866	cortical actin cytoskeleton organization	biological_process	0.12012	1	5	6525	10	24278	1.18212e+44
GO:0006171	cAMP biosynthetic process	biological_process	0.12069	1	8	6525	18	24278	1.18233e+71
GO:0046058	cAMP metabolic process	biological_process	0.12069	1	8	6525	18	24278	1.18212e+71
GO:0009307	DNA restriction-modification system	biological_process	0.1215	1	10	6525	25	24278	1.18228e+89
GO:0044355	clearance of foreign intracellular DNA	biological_process	0.1215	1	10	6525	25	24278	1.18223e+89
GO:0004673	protein histidine kinase activity	molecular_function	0.12196	1	25	6525	71	24278	1.18216e+224
GO:0016775	phosphotransferase activity, nitrogenous group as acceptor	molecular_function	0.12196	1	25	6525	71	24278	1.18212e+224
GO:0008417	fucosyltransferase activity	molecular_function	0.12222	1	8	6525	19	24278	1.1822e+71
GO:0019068	virion assembly	biological_process	0.12291	1	33	6525	99	24278	118209923,118220913,118223335,118225886,118213172,118226305,118233322,118214637,118233896,118231588,118214636,118214635,118219089,118207489,118210449,118216641,118225845,118208527,118231156,118236711,118206714,118224760,118211270,118223961,118220877,118215029,118211880,118234817,118216376,118216561,118207482,118236611,118220151
GO:0007548	sex differentiation	biological_process	0.12434	1	13	6525	34	24278	1.18215e+116
GO:0042995	cell projection	cellular_component	0.12474	1	61	6525	198	24278	118231797,118228772,118217032,118219770,118221032,118212714,118219227,118206759,118231403,118230594,118226971,118220534,118212919,118226210,118237345,118218108,118206747,118225992,118232940,118223333,118218443,118206359,118229533,118233219,118223989,118225213,118225719,118209590,118237514,118209908,118228406,118213036,118226944,118237154,XLOC_265637,118216931,118214066,118235585,118221152,1182177…
GO:0009081	branched-chain amino acid metabolic process	biological_process	0.12491	1	8	6525	18	24278	1.18224e+71
GO:0009082	branched-chain amino acid biosynthetic process	biological_process	0.12491	1	8	6525	18	24278	1.18231e+71
GO:0042157	lipoprotein metabolic process	biological_process	0.12523	1	65	6525	213	24278	118232162,118231014,118235473,118208281,118215405,118209189,118234361,118227932,118221152,118236149,118214611,118234363,118225293,118211455,118216663,118217733,118207403,118217159,118219931,118229527,118228880,118223472,118228882,118229992,118228956,118234358,118225489,118221081,118218329,118217901,118210871,118216228,118234374,118236393,118209433,118236446,118216906,118217906,118233345,118235161…
GO:0007127	meiosis I	biological_process	0.12686	1	12	6525	33	24278	1.18225e+107
GO:0003956	NAD(P)+-protein-arginine ADP-ribosyltransferase activity	molecular_function	0.12708	1	3	6525	5	24278	1.1822e+26
GO:0019069	viral capsid assembly	biological_process	0.12722	1	20	6525	58	24278	1.18215e+179
GO:0016810	hydrolase activity, acting on carbon-nitrogen (but not peptide) bonds	molecular_function	0.12739	1	37	6525	116	24278	118234993,118223888,118207501,118222295,118224566,118207531,118231102,118207413,118232748,118217240,118225575,118224500,118220386,118227218,118214482,118232175,118211107,118226304,118224938,118233930,118236733,118222781,118228049,118209286,118221872,118231456,118234710,118210737,118215748,118215688,118230338,118235050,118211930,118216621,118231500,118214233,118232747
GO:0008645	hexose transport	biological_process	0.13005	1	7	6525	15	24278	1.18231e+62
GO:0015749	monosaccharide transport	biological_process	0.13005	1	7	6525	15	24278	1.18213e+62
GO:0006836	neurotransmitter transport	biological_process	0.13007	1	22	6525	64	24278	1.18227e+197
GO:0032040	small-subunit processome	cellular_component	0.13104	1	36	6525	109	24278	118207751,118214005,118213029,XLOC_168682,118215187,118213014,118227557,118232153,118217995,118210872,118227802,118229252,118215650,118223423,118235420,118214620,118228851,118226832,118233853,118215768,118232203,118222281,118219986,118206571,118207970,118220428,118217625,118227567,118214885,118233344,118217827,118232347,118215425,118211644,118228191,118215238
GO:0003756	protein disulfide isomerase activity	molecular_function	0.13134	1	3	6525	5	24278	1.18209e+26
GO:0016864	intramolecular oxidoreductase activity, transposing S-S bonds	molecular_function	0.13134	1	3	6525	5	24278	1.18209e+26
GO:0016730	oxidoreductase activity, acting on iron-sulfur proteins as donors	molecular_function	0.13171	1	6	6525	14	24278	1.18216e+53
GO:0010243	response to organonitrogen compound	biological_process	0.13225	1	5	6525	11	24278	1.18207e+44
GO:0040008	regulation of growth	biological_process	0.13308	1	19	6525	57	24278	1.1823e+170
GO:0031984	organelle subcompartment	cellular_component	0.13366	1	14	6525	38	24278	1.18229e+125
GO:0098791	Golgi subcompartment	cellular_component	0.13366	1	14	6525	38	24278	1.18211e+125
GO:0048878	chemical homeostasis	biological_process	0.13367	1	32	6525	98	24278	118210737,118231508,118208360,118234636,118236711,118227217,118210147,118219062,118207668,118216225,118213439,118230135,118219691,118217214,118210315,118214144,118215390,118212855,118225768,118212577,118228092,118228062,118233957,118233668,118236393,118209433,118229820,118212348,118214094,XLOC_168682,118213029,118206425
GO:0016756	glutathione gamma-glutamylcysteinyltransferase activity	molecular_function	0.13752	1	4	6525	8	24278	1.18228e+35
GO:0046937	phytochelatin metabolic process	biological_process	0.13752	1	4	6525	8	24278	1.18233e+35
GO:0046938	phytochelatin biosynthetic process	biological_process	0.13752	1	4	6525	8	24278	1.18212e+35
GO:0019955	cytokine binding	molecular_function	0.13808	1	3	6525	5	24278	1.18234e+26
GO:0016888	endodeoxyribonuclease activity, producing 5'-phosphomonoesters	molecular_function	0.13853	1	15	6525	41	24278	1.18228e+134
GO:0050852	T cell receptor signaling pathway	biological_process	0.14138	1	4	6525	8	24278	1.18214e+35
GO:0003879	ATP phosphoribosyltransferase activity	molecular_function	0.14139	1	3	6525	5	24278	1.18208e+26
GO:0002429	immune response-activating cell surface receptor signaling pathway	biological_process	0.14282	1	6	6525	14	24278	1.18214e+53
GO:0002757	immune response-activating signal transduction	biological_process	0.14282	1	6	6525	14	24278	1.18235e+53
GO:0002768	immune response-regulating cell surface receptor signaling pathway	biological_process	0.14282	1	6	6525	14	24278	1.1821e+53
GO:0050851	antigen receptor-mediated signaling pathway	biological_process	0.14282	1	6	6525	14	24278	1.18214e+53
GO:0008194	UDP-glycosyltransferase activity	molecular_function	0.14337	1	33	6525	99	24278	118234393,118217044,118237554,118217995,118228248,118237161,118208281,118231854,118213361,118229105,118214948,118212966,118221334,118227846,118233818,118208889,118218242,118237422,118216521,118208417,118216039,118234966,118206747,118208365,118215602,118236375,118212367,118213624,118237394,118223959,118228416,118231764,118212257
GO:0042493	response to drug	biological_process	0.14342	1	8	6525	19	24278	1.18236e+71
GO:0005816	spindle pole body	cellular_component	0.14396	1	6	6525	14	24278	1.18219e+53
GO:0005823	central plaque of spindle pole body	cellular_component	0.14396	1	6	6525	14	24278	1.18219e+53
GO:0044450	microtubule organizing center part	cellular_component	0.14396	1	6	6525	14	24278	1.1823e+53
GO:0008375	acetylglucosaminyltransferase activity	molecular_function	0.14425	1	17	6525	48	24278	1.18217e+152
GO:0051169	nuclear transport	biological_process	0.14472	1	53	6525	172	24278	118219993,118209406,118220534,118226971,118207182,118216376,118234279,118206759,118207403,118210697,118237482,118231797,118215527,118210353,118211930,118236711,118215164,118235794,118223989,118228804,118237514,118225079,118237477,118232940,118220018,118218443,118214922,118220871,118211265,118237140,118226431,118213722,118235389,118230887,118215779,118222869,118208621,118218356,118216977,118223994…
GO:0009968	negative regulation of signal transduction	biological_process	0.14621	1	8	6525	21	24278	1.18217e+71
GO:0010648	negative regulation of cell communication	biological_process	0.14621	1	8	6525	21	24278	1.18226e+71
GO:0023057	negative regulation of signaling	biological_process	0.14621	1	8	6525	21	24278	1.18217e+71
GO:0004511	tyrosine 3-monooxygenase activity	molecular_function	0.1466	1	8	6525	19	24278	1.18215e+71
GO:0005921	gap junction	cellular_component	0.14761	1	6	6525	14	24278	1.18219e+53
GO:0005856	cytoskeleton	cellular_component	0.14802	1	192	6525	641	24278	118217785,118220555,118218299,118219299,118234374,118211499,118216851,118224251,118230887,118228451,118233456,118222134,118217640,118229265,118223276,118208284,118235328,118210647,118219179,118211234,118215170,118230085,118216933,118213172,118227623,118217042,118213211,118212876,118210622,118219842,118218466,118208976,118212922,118217178,118215582,118235475,118216225,118223946,118225468,118216435…
GO:0004535	poly(A)-specific ribonuclease activity	molecular_function	0.14804	1	10	6525	26	24278	1.18226e+89
GO:0005976	polysaccharide metabolic process	biological_process	0.14864	1	23	6525	69	24278	1.18237e+206
GO:0015708	silicate transport	biological_process	0.15114	1	3	6525	5	24278	1.18222e+26
GO:0006913	nucleocytoplasmic transport	biological_process	0.15124	1	51	6525	166	24278	118223989,118235794,118225079,118228804,118237514,118237477,118232940,118218443,118220018,118220871,118214922,118211930,118236711,118215164,118206759,118234279,118207403,118231797,118210697,118237482,118215527,118210353,118219993,118209406,118207182,118226971,118220534,118216376,118211234,118227073,118208647,118222230,118223994,118210553,118218356,118216977,118220913,118218466,118211126,118216601…
GO:0006606	protein import into nucleus	biological_process	0.15357	1	42	6525	134	24278	118210553,118223994,118218356,118220913,118218466,118216601,118211126,118213172,118217042,118234730,118208647,118211234,118222230,118211265,118237140,118213722,118230887,118222869,118208621,118211930,118215164,118223989,118235794,118237514,118228804,118218443,118232940,118237477,118220871,118214922,118219993,118209406,118226971,118207182,118220534,118216376,118206759,118207403,118237482,118231797…
GO:0034504	protein localization to nucleus	biological_process	0.15357	1	42	6525	134	24278	118237477,118232940,118218443,118220871,118214922,118223989,118235794,118228804,118237514,118215164,118211930,118215527,118210697,118237482,118231797,118206759,118207403,118226971,118207182,118220534,118216376,118219993,118209406,118222230,118211234,118208647,118216601,118211126,118213172,118217042,118234730,118223994,118210553,118218356,118220913,118218466,118222869,118208621,118230887,118237140…
GO:0044744	protein targeting to nucleus	biological_process	0.15357	1	42	6525	134	24278	118208621,118222869,118230887,118213722,118237140,118211265,118222230,118211234,118208647,118234730,118216601,118211126,118213172,118217042,118220913,118218466,118223994,118210553,118218356,118215527,118237482,118231797,118210697,118207403,118206759,118216376,118226971,118207182,118220534,118219993,118209406,118220871,118214922,118237477,118232940,118218443,118237514,118228804,118223989,118235794…
GO:0051170	nuclear import	biological_process	0.15357	1	42	6525	134	24278	118211930,118215164,118235794,118223989,118228804,118237514,118218443,118232940,118237477,118214922,118220871,118219993,118209406,118220534,118226971,118207182,118216376,118206759,118207403,118210697,118231797,118237482,118215527,118218356,118210553,118223994,118218466,118220913,118217042,118216601,118211126,118213172,118234730,118211234,118208647,118222230,118211265,118237140,118213722,118230887…
GO:1902593	single-organism nuclear import	biological_process	0.15357	1	42	6525	134	24278	118234730,118213172,118216601,118211126,118217042,118220913,118218466,118210553,118223994,118218356,118222230,118208647,118211234,118213722,118237140,118211265,118208621,118222869,118230887,118215164,118211930,118220871,118214922,118237477,118232940,118218443,118237514,118228804,118223989,118235794,118216376,118226971,118207182,118220534,118219993,118209406,118237482,118210697,118215527,118231797…
GO:0004664	prephenate dehydratase activity	molecular_function	0.15404	1	2	6525	3	24278	1.18226e+17
GO:0009094	L-phenylalanine biosynthetic process	biological_process	0.15404	1	2	6525	3	24278	1.18231e+17
GO:1902223	erythrose 4-phosphate/phosphoenolpyruvate family amino acid biosynthetic process	biological_process	0.15404	1	2	6525	3	24278	1.18231e+17
GO:0005164	tumor necrosis factor receptor binding	molecular_function	0.1545	1	12	6525	35	24278	1.18233e+107
GO:0032813	tumor necrosis factor receptor superfamily binding	molecular_function	0.1545	1	12	6525	35	24278	1.18214e+107
GO:0005681	spliceosomal complex	cellular_component	0.15475	1	17	6525	50	24278	1.18216e+152
GO:0009036	Type II site-specific deoxyribonuclease activity	molecular_function	0.15502	1	10	6525	26	24278	1.18207e+89
GO:0015666	restriction endodeoxyribonuclease activity	molecular_function	0.15502	1	10	6525	26	24278	1.1823e+89
GO:0006611	protein export from nucleus	biological_process	0.15691	1	3	6525	6	24278	1.18225e+26
GO:0006998	nuclear envelope organization	biological_process	0.15691	1	3	6525	6	24278	1.18216e+26
GO:0005133	interferon-gamma receptor binding	molecular_function	0.1575	1	2	6525	3	24278	1.18219e+17
GO:0004126	cytidine deaminase activity	molecular_function	0.15765	1	2	6525	3	24278	1.18208e+17
GO:0006216	cytidine catabolic process	biological_process	0.15765	1	2	6525	3	24278	1.1823e+17
GO:0009164	nucleoside catabolic process	biological_process	0.15765	1	2	6525	3	24278	1.18208e+17
GO:0009972	cytidine deamination	biological_process	0.15765	1	2	6525	3	24278	1.18208e+17
GO:0042454	ribonucleoside catabolic process	biological_process	0.15765	1	2	6525	3	24278	1.1823e+17
GO:0046087	cytidine metabolic process	biological_process	0.15765	1	2	6525	3	24278	1.1823e+17
GO:0046133	pyrimidine ribonucleoside catabolic process	biological_process	0.15765	1	2	6525	3	24278	1.1823e+17
GO:0046135	pyrimidine nucleoside catabolic process	biological_process	0.15765	1	2	6525	3	24278	1.18208e+17
GO:0072529	pyrimidine-containing compound catabolic process	biological_process	0.15765	1	2	6525	3	24278	1.18208e+17
GO:1901658	glycosyl compound catabolic process	biological_process	0.15765	1	2	6525	3	24278	1.1823e+17
GO:0009898	cytoplasmic side of plasma membrane	cellular_component	0.1577	1	11	6525	32	24278	1.18221e+98
GO:0098552	side of membrane	cellular_component	0.1577	1	11	6525	32	24278	1.18217e+98
GO:0098562	cytoplasmic side of membrane	cellular_component	0.1577	1	11	6525	32	24278	1.1822e+98
GO:0008217	regulation of blood pressure	biological_process	0.15771	1	5	6525	12	24278	1.18212e+44
GO:0042311	vasodilation	biological_process	0.15771	1	5	6525	12	24278	1.18212e+44
GO:0042312	regulation of vasodilation	biological_process	0.15771	1	5	6525	12	24278	1.18212e+44
GO:0007623	circadian rhythm	biological_process	0.15805	1	13	6525	36	24278	1.18218e+116
GO:0033057	multicellular organismal reproductive behavior	biological_process	0.15943	1	7	6525	16	24278	118220424,118226824,118222231,XLOC_283220,118206297,118217558,118214531
GO:0044706	multi-multicellular organism process	biological_process	0.15943	1	7	6525	16	24278	118226824,118222231,XLOC_283220,118206297,118220424,118217558,118214531
GO:0045924	regulation of female receptivity	biological_process	0.15943	1	7	6525	16	24278	118220424,118222231,118226824,XLOC_283220,118206297,118217558,118214531
GO:0046008	regulation of female receptivity, post-mating	biological_process	0.15943	1	7	6525	16	24278	118206297,XLOC_283220,118222231,118226824,118220424,118214531,118217558
GO:0060180	female mating behavior	biological_process	0.15943	1	7	6525	16	24278	118220424,XLOC_283220,118206297,118222231,118226824,118217558,118214531
GO:0045095	keratin filament	cellular_component	0.15955	1	16	6525	46	24278	1.18234e+143
GO:0030667	secretory granule membrane	cellular_component	0.16048	1	3	6525	6	24278	1.18237e+26
GO:0008218	bioluminescence	biological_process	0.16094	1	4	6525	8	24278	1.18227e+35
GO:0043230	extracellular organelle	cellular_component	0.16122	1	2	6525	3	24278	1.18218e+17
GO:0043549	regulation of kinase activity	biological_process	0.16139	1	11	6525	30	24278	1.18234e+98
GO:0045859	regulation of protein kinase activity	biological_process	0.16139	1	11	6525	30	24278	1.18217e+98
GO:0048585	negative regulation of response to stimulus	biological_process	0.16377	1	17	6525	51	24278	1.18234e+152
GO:0046332	SMAD binding	molecular_function	0.16449	1	6	6525	14	24278	1.18212e+53
GO:0005751	mitochondrial respiratory chain complex IV	cellular_component	0.16453	1	3	6525	6	24278	1.18235e+26
GO:0045277	respiratory chain complex IV	cellular_component	0.16453	1	3	6525	6	24278	1.18224e+26
GO:0005507	copper ion binding	molecular_function	0.16554	1	25	6525	75	24278	1.1822e+224
GO:0006821	chloride transport	biological_process	0.16684	1	7	6525	17	24278	1.18221e+62
GO:0031982	vesicle	cellular_component	0.16769	1	52	6525	168	24278	118223881,118206820,118222891,118209859,118220689,118229150,118235388,118236639,118208184,118231437,118215146,118235866,118226277,118208238,118219845,118231506,118208847,118211947,118224234,118211568,118215697,118224348,118223525,118213968,118230244,118235390,118219009,118230630,118223073,118230202,118229879,118235447,118216280,118230990,118229862,118229582,118211781,118229085,118227092,118223875…
GO:0016846	carbon-sulfur lyase activity	molecular_function	0.16779	1	10	6525	27	24278	1.18221e+89
GO:0016049	cell growth	biological_process	0.16833	1	18	6525	55	24278	1.18216e+161
GO:0031410	cytoplasmic vesicle	cellular_component	0.1704	1	51	6525	165	24278	118227092,118223875,118229085,118235447,118216280,118230990,118229862,118211781,118229582,118230630,118223073,118230202,118229879,118221644,118210619,118215477,118235779,118213022,118226778,118210359,118213204,118221933,118234343,118221801,118236639,118208184,118231437,118220689,118209859,118229150,118235388,118206820,118222891,118223881,118213968,118223525,118230244,118235390,118219009,118215697…
GO:0007631	feeding behavior	biological_process	0.17067	1	10	6525	27	24278	1.18209e+89
GO:0045048	protein insertion into ER membrane	biological_process	0.17157	1	3	6525	6	24278	1.18214e+26
GO:0071816	tail-anchored membrane protein insertion into ER membrane	biological_process	0.17157	1	3	6525	6	24278	1.18213e+26
GO:0006359	regulation of transcription from RNA polymerase III promoter	biological_process	0.17211	1	10	6525	26	24278	1.18206e+89
GO:0051051	negative regulation of transport	biological_process	0.17273	1	7	6525	16	24278	1.18213e+62
GO:0070069	cytochrome complex	cellular_component	0.17469	1	14	6525	41	24278	1.18212e+125
GO:0009314	response to radiation	biological_process	0.17542	1	6	6525	14	24278	1.18215e+53
GO:0017089	glycolipid transporter activity	molecular_function	0.17553	1	8	6525	21	24278	1.18209e+71
GO:0046836	glycolipid transport	biological_process	0.17553	1	8	6525	21	24278	1.18209e+71
GO:0045132	meiotic chromosome segregation	biological_process	0.17562	1	7	6525	18	24278	1.18233e+62
GO:0030288	outer membrane-bounded periplasmic space	cellular_component	0.17599	1	4	6525	8	24278	1.18231e+35
GO:0048309	endoplasmic reticulum inheritance	biological_process	0.17696	1	6	6525	14	24278	1.18213e+53
GO:0055082	cellular chemical homeostasis	biological_process	0.17846	1	28	6525	87	24278	XLOC_168682,118216225,118213439,118206425,118230135,118213029,118219691,118233957,118236393,118209433,118210147,118229820,118214094,118212348,118225768,118231508,118210737,118208360,118234636,118212577,118236711,118228092,118228062,118217214,118210315,118214144,118215390,118212855
GO:0015459	potassium channel regulator activity	molecular_function	0.1786	1	7	6525	17	24278	1.18221e+62
GO:0019870	potassium channel inhibitor activity	molecular_function	0.1786	1	7	6525	17	24278	1.1821e+62
GO:0043240	Fanconi anaemia nuclear complex	cellular_component	0.17943	1	4	6525	8	24278	1.18218e+35
GO:0004014	adenosylmethionine decarboxylase activity	molecular_function	0.17956	1	2	6525	3	24278	1.18206e+17
GO:0008216	spermidine metabolic process	biological_process	0.17956	1	2	6525	3	24278	1.18206e+17
GO:0008295	spermidine biosynthetic process	biological_process	0.17956	1	2	6525	3	24278	1.18206e+17
GO:0008237	metallopeptidase activity	molecular_function	0.18159	1	88	6525	294	24278	118237384,118234305,118214873,118214011,118217367,118225686,118214965,118208543,118212609,118233766,118214426,118208423,118232828,118223959,118215576,118236624,118214850,118226778,118224650,118229222,118224113,118227012,118225776,118211647,118209130,118223764,118207489,118208888,118214493,118222547,118210579,118213023,118214531,118226801,118232304,118228457,118227029,118229867,118222281,118220611…
GO:0004725	protein tyrosine phosphatase activity	molecular_function	0.18195	1	50	6525	159	24278	118218088,118206818,118210445,118234867,118225026,118214261,118222606,118231021,118222967,118234132,118217694,118221801,118208044,118213718,118230608,118214064,118234757,118227791,118206412,118210864,118224731,118234881,118209442,118211327,118213339,118226898,118215237,118227623,118207977,118230738,118227313,118234317,118229467,118211951,118226102,118226584,118218087,118222487,118229204,118218427…
GO:0004584	dolichyl-phosphate-mannose-glycolipid alpha-mannosyltransferase activity	molecular_function	0.18254	1	2	6525	3	24278	1.18211e+17
GO:0016813	hydrolase activity, acting on carbon-nitrogen (but not peptide) bonds, in linear amidines	molecular_function	0.18306	1	7	6525	18	24278	1.18214e+62
GO:0009507	chloroplast	cellular_component	0.18441	1	8	6525	20	24278	1.1822e+71
GO:0009536	plastid	cellular_component	0.18441	1	8	6525	20	24278	1.1822e+71
GO:0043130	ubiquitin binding	molecular_function	0.18492	1	10	6525	26	24278	1.18223e+89
GO:0008376	acetylgalactosaminyltransferase activity	molecular_function	0.18616	1	6	6525	14	24278	1.18213e+53
GO:0031985	Golgi cisterna	cellular_component	0.18616	1	6	6525	14	24278	1.18216e+53
GO:0032580	Golgi cisterna membrane	cellular_component	0.18616	1	6	6525	14	24278	1.18213e+53
GO:0070008	serine-type exopeptidase activity	molecular_function	0.18641	1	21	6525	65	24278	1.1823e+188
GO:0046148	pigment biosynthetic process	biological_process	0.18646	1	23	6525	70	24278	1.18226e+206
GO:0019062	virion attachment to host cell	biological_process	0.1865	1	10	6525	27	24278	1.18207e+89
GO:0044650	adhesion of symbiont to host cell	biological_process	0.1865	1	10	6525	27	24278	1.18207e+89
GO:0006885	regulation of pH	biological_process	0.18738	1	3	6525	6	24278	1.18219e+26
GO:0055067	monovalent inorganic cation homeostasis	biological_process	0.18738	1	3	6525	6	24278	1.18227e+26
GO:0005666	DNA-directed RNA polymerase III complex	cellular_component	0.18857	1	9	6525	24	24278	118232358,118222763,118235219,118225768,XLOC_168682,118216225,118220428,118214144,118232350
GO:0042597	periplasmic space	cellular_component	0.18909	1	15	6525	44	24278	1.18219e+134
GO:0016999	antibiotic metabolic process	biological_process	0.18953	1	3	6525	6	24278	1.18226e+26
GO:0017000	antibiotic biosynthetic process	biological_process	0.18953	1	3	6525	6	24278	1.18226e+26
GO:0017144	drug metabolic process	biological_process	0.18953	1	3	6525	6	24278	1.18214e+26
GO:0001558	regulation of cell growth	biological_process	0.18964	1	17	6525	53	24278	1.18237e+152
GO:0051606	detection of stimulus	biological_process	0.19055	1	5	6525	11	24278	1.18226e+44
GO:0004867	serine-type endopeptidase inhibitor activity	molecular_function	0.19168	1	30	6525	92	24278	118212523,118223011,118232187,118208234,118224216,118215141,118225609,118230454,118215768,118221640,118219571,118218719,118230215,118207472,118209063,118206513,118229228,118213779,118229840,118234269,118208391,118222295,118223754,118225783,118231859,118207914,118214387,118232162,118234248,118216375
GO:0030151	molybdenum ion binding	molecular_function	0.19183	1	5	6525	11	24278	1.18209e+44
GO:0044264	cellular polysaccharide metabolic process	biological_process	0.19194	1	14	6525	41	24278	1.18228e+125
GO:0033013	tetrapyrrole metabolic process	biological_process	0.19242	1	50	6525	162	24278	118217261,118227287,118217995,118208454,118216641,XLOC_168682,118215706,118217667,118214939,118213014,118210027,118228296,118228043,118237072,118209950,118220814,118226421,118214464,118216416,118232883,118210090,118208504,118221380,118225420,118208628,118232311,118232106,118217625,118209194,118234419,118214698,118222763,118234036,118213061,118213071,118223032,118235552,118223959,118229407,1182259…
GO:0003872	6-phosphofructokinase activity	molecular_function	0.19264	1	3	6525	6	24278	1.18207e+26
GO:0008081	phosphoric diester hydrolase activity	molecular_function	0.193	1	39	6525	120	24278	118229574,118209881,118212406,118206571,118221458,118217027,118223977,118223579,118217275,118214183,118222833,118221825,118229604,118213843,118207550,118218741,118211950,118223869,118210964,118222534,118211417,118217666,118210608,118214308,118236475,118223626,118218425,118234468,118230025,118217126,118233369,118206655,118212535,118231142,118219900,118230605,118225468,118223517,118220558
GO:0015385	sodium:proton antiporter activity	molecular_function	0.19339	1	3	6525	5	24278	1.1822e+26
GO:0030684	preribosome	cellular_component	0.19363	1	40	6525	126	24278	118207213,118222763,118217625,118227567,118220428,118207970,118233344,118214885,118215238,118228191,118232347,118211644,118217827,118215425,118215187,118213014,118227557,XLOC_168682,118213029,118214005,118207751,118229252,118210872,118227802,118217995,118232153,118233853,118228851,118226832,118212746,118214375,118235420,118214620,118215650,118223423,118219986,118206571,118222281,118232203,1182157…
GO:0047286	NAD+-diphthamide ADP-ribosyltransferase activity	molecular_function	0.19542	1	3	6525	6	24278	1.18214e+26
GO:0004764	shikimate 3-dehydrogenase (NADP+) activity	molecular_function	0.19666	1	2	6525	3	24278	1.18228e+17
GO:0005217	intracellular ligand-gated ion channel activity	molecular_function	0.19717	1	20	6525	59	24278	118217214,118210315,118214144,118212855,118225768,118210737,118231508,118208360,118212577,118234636,118228062,118236393,118209433,118229820,XLOC_168682,118216225,118213439,118230135,118206425,118213029
GO:0005218	intracellular ligand-gated calcium channel activity	molecular_function	0.19717	1	20	6525	59	24278	XLOC_168682,118216225,118213439,118206425,118230135,118213029,118209433,118236393,118229820,118225768,118231508,118210737,118208360,118234636,118212577,118228062,118217214,118210315,118214144,118212855
GO:0005219	ryanodine-sensitive calcium-release channel activity	molecular_function	0.19717	1	20	6525	59	24278	118208360,118231508,118210737,118225768,118228062,118234636,118212577,118214144,118210315,118217214,118212855,118216225,XLOC_168682,118206425,118230135,118213029,118213439,118229820,118209433,118236393
GO:0015278	calcium-release channel activity	molecular_function	0.19717	1	20	6525	59	24278	118213439,118230135,118213029,118206425,XLOC_168682,118216225,118209433,118236393,118229820,118234636,118212577,118228062,118225768,118210737,118231508,118208360,118212855,118217214,118210315,118214144
GO:0004721	phosphoprotein phosphatase activity	molecular_function	0.19734	1	56	6525	181	24278	118227379,118225026,118234867,118210445,118214261,118218088,118206818,118217694,118230608,118208044,118221801,118213718,118222606,118231021,118234132,118214951,118222967,118222742,118234757,118210864,118206412,118227791,118233645,118214064,118211327,118209005,118213339,118234881,118224731,118209442,118227313,118230738,118207977,118227623,118226898,118215237,118208272,118211951,118229467,118226102…
GO:0019239	deaminase activity	molecular_function	0.19927	1	12	6525	35	24278	1.18208e+107
GO:0031109	microtubule polymerization or depolymerization	biological_process	0.20052	1	14	6525	42	24278	1.18227e+125
GO:0031110	regulation of microtubule polymerization or depolymerization	biological_process	0.20052	1	14	6525	42	24278	1.18224e+125
GO:1901264	carbohydrate derivative transport	biological_process	0.20066	1	9	6525	25	24278	1.18209e+80
GO:0005834	heterotrimeric G-protein complex	cellular_component	0.2008	1	10	6525	30	24278	1.18221e+89
GO:0019897	extrinsic component of plasma membrane	cellular_component	0.2008	1	10	6525	30	24278	1.1822e+89
GO:0031234	extrinsic component of cytoplasmic side of plasma membrane	cellular_component	0.2008	1	10	6525	30	24278	1.1822e+89
GO:0009279	cell outer membrane	cellular_component	0.20103	1	9	6525	25	24278	1.18232e+80
GO:0050801	ion homeostasis	biological_process	0.2015	1	26	6525	81	24278	118213439,118219691,118230135,118206425,118213029,118207668,XLOC_168682,118216225,118209433,118236393,118219062,118229820,118236711,118227217,118234636,118212577,118228062,118210737,118231508,118225768,118208360,118212855,118215390,118217214,118214144,118210315
GO:0055080	cation homeostasis	biological_process	0.2015	1	26	6525	81	24278	118225768,118231508,118210737,118208360,118212577,118234636,118236711,118227217,118228062,118217214,118210315,118214144,118212855,118215390,XLOC_168682,118207668,118216225,118213439,118206425,118230135,118213029,118219691,118209433,118236393,118229820,118219062
GO:0098771	inorganic ion homeostasis	biological_process	0.2015	1	26	6525	81	24278	118230135,118213029,118206425,118219691,118213439,118216225,XLOC_168682,118207668,118229820,118219062,118236393,118209433,118228062,118234636,118212577,118236711,118227217,118208360,118225768,118231508,118210737,118215390,118212855,118210315,118214144,118217214
GO:0005158	insulin receptor binding	molecular_function	0.20251	1	10	6525	26	24278	1.18228e+89
GO:0030158	protein xylosyltransferase activity	molecular_function	0.20427	1	2	6525	3	24278	1.18221e+17
GO:0035252	UDP-xylosyltransferase activity	molecular_function	0.20427	1	2	6525	3	24278	1.18221e+17
GO:0042285	xylosyltransferase activity	molecular_function	0.20427	1	2	6525	3	24278	1.18216e+17
GO:0001836	release of cytochrome c from mitochondria	biological_process	0.20536	1	8	6525	21	24278	1.18237e+71
GO:0008637	apoptotic mitochondrial changes	biological_process	0.20536	1	8	6525	21	24278	1.18229e+71
GO:0097190	apoptotic signaling pathway	biological_process	0.20536	1	8	6525	21	24278	1.18229e+71
GO:0031325	positive regulation of cellular metabolic process	biological_process	0.20595	1	79	6525	268	24278	118233413,118216376,118237345,118233902,118226971,118236034,118219993,118228189,118206747,118229368,118232002,118208070,118221031,118210147,118227762,118220341,118217348,118221015,118232510,118220984,118237154,118231651,118217844,118233598,118237514,118210970,118225163,118227991,118212328,118211905,118233957,118224680,118222869,118229961,118227004,118214094,118212966,118218356,118211815,118226760…
GO:0048511	rhythmic process	biological_process	0.20654	1	13	6525	38	24278	1.18228e+116
GO:0005891	voltage-gated calcium channel complex	cellular_component	0.20654	1	7	6525	18	24278	1.18214e+62
GO:0034704	calcium channel complex	cellular_component	0.20654	1	7	6525	18	24278	1.18214e+62
GO:0008380	RNA splicing	biological_process	0.20735	1	32	6525	102	24278	118227991,118231104,118214005,118231124,118210871,118210872,118210784,118216933,118209346,118218787,118216977,118216387,118215650,118210647,118218161,118236574,118216561,118223305,118211856,118212979,118212714,118229294,118217184,118208190,118227731,118223127,118206249,118235743,118235763,118222289,118223749,118227140
GO:0047750	cholestenol delta-isomerase activity	molecular_function	0.20761	1	4	6525	9	24278	1.18208e+35
GO:0002218	activation of innate immune response	biological_process	0.20784	1	3	6525	6	24278	1.18223e+26
GO:0031349	positive regulation of defense response	biological_process	0.20784	1	3	6525	6	24278	1.18223e+26
GO:0032479	regulation of type I interferon production	biological_process	0.20784	1	3	6525	6	24278	1.18223e+26
GO:0032481	positive regulation of type I interferon production	biological_process	0.20784	1	3	6525	6	24278	1.18223e+26
GO:0032606	type I interferon production	biological_process	0.20784	1	3	6525	6	24278	1.18233e+26
GO:0045088	regulation of innate immune response	biological_process	0.20784	1	3	6525	6	24278	1.18223e+26
GO:0045089	positive regulation of innate immune response	biological_process	0.20784	1	3	6525	6	24278	1.18222e+26
GO:0034702	ion channel complex	cellular_component	0.20821	1	16	6525	45	24278	1.18217e+143
GO:0034703	cation channel complex	cellular_component	0.20821	1	16	6525	45	24278	1.18207e+143
GO:0007096	regulation of exit from mitosis	biological_process	0.20867	1	3	6525	6	24278	1.18209e+26
GO:0010458	exit from mitosis	biological_process	0.20867	1	3	6525	6	24278	1.18209e+26
GO:0003933	GTP cyclohydrolase activity	molecular_function	0.2099	1	3	6525	6	24278	1.18212e+26
GO:0071973	bacterial-type flagellum-dependent cell motility	biological_process	0.21188	1	12	6525	35	24278	118222604,118237514,118228406,118216428,118213306,118233219,118223333,XLOC_265637,118225992,118217691,118209172,118210784
GO:0070851	growth factor receptor binding	molecular_function	0.21191	1	9	6525	25	24278	1.1821e+80
GO:0000375	RNA splicing, via transesterification reactions	biological_process	0.21257	1	28	6525	88	24278	118212714,118210871,118210872,118229294,118216561,118231104,118227991,118214005,118211856,118212979,118231124,118223305,118210647,118235743,118206249,118222289,118227140,118223749,118218161,118235763,118209346,118210784,118216933,118217184,118208190,118215650,118216977,118216387
GO:0046429	4-hydroxy-3-methylbut-2-en-1-yl diphosphate synthase activity	molecular_function	0.21341	1	2	6525	3	24278	1.18212e+17
GO:0052592	oxidoreductase activity, acting on CH or CH2 groups, with an iron-sulfur protein as acceptor	molecular_function	0.21341	1	2	6525	3	24278	1.18212e+17
GO:0030261	chromosome condensation	biological_process	0.21381	1	9	6525	23	24278	1.18214e+80
GO:0015370	solute:sodium symporter activity	molecular_function	0.2141	1	25	6525	78	24278	1.18228e+224
GO:0000347	THO complex	cellular_component	0.21483	1	9	6525	26	24278	1.18207e+80
GO:0044038	cell wall macromolecule biosynthetic process	biological_process	0.21684	1	4	6525	9	24278	1.18229e+35
GO:0070589	cellular component macromolecule biosynthetic process	biological_process	0.21684	1	4	6525	9	24278	1.18208e+35
GO:0006909	phagocytosis	biological_process	0.2174	1	2	6525	3	24278	1.18218e+17
GO:0030100	regulation of endocytosis	biological_process	0.2174	1	2	6525	3	24278	1.18215e+17
GO:0045806	negative regulation of endocytosis	biological_process	0.2174	1	2	6525	3	24278	1.18215e+17
GO:0050764	regulation of phagocytosis	biological_process	0.2174	1	2	6525	3	24278	1.18218e+17
GO:0050765	negative regulation of phagocytosis	biological_process	0.2174	1	2	6525	3	24278	1.18218e+17
GO:0005813	centrosome	cellular_component	0.21855	1	4	6525	9	24278	118235585,118217743,118208976,XLOC_265637
GO:0019213	deacetylase activity	molecular_function	0.21999	1	2	6525	3	24278	1.18237e+17
GO:0006874	cellular calcium ion homeostasis	biological_process	0.22002	1	20	6525	60	24278	118225768,118231508,118210737,118208360,118212577,118234636,118228062,118217214,118210315,118214144,118212855,XLOC_168682,118216225,118213439,118213029,118230135,118206425,118209433,118236393,118229820
GO:0055074	calcium ion homeostasis	biological_process	0.22002	1	20	6525	60	24278	118210315,118214144,118217214,118212855,118208360,118225768,118210737,118231508,118228062,118234636,118212577,118229820,118236393,118209433,118216225,XLOC_168682,118230135,118213029,118206425,118213439
GO:0072503	cellular divalent inorganic cation homeostasis	biological_process	0.22002	1	20	6525	60	24278	118229820,118236393,118209433,118230135,118206425,118213029,118213439,118216225,XLOC_168682,118212855,118214144,118210315,118217214,118228062,118234636,118212577,118208360,118210737,118231508,118225768
GO:0072507	divalent inorganic cation homeostasis	biological_process	0.22002	1	20	6525	60	24278	118209433,118236393,118229820,XLOC_168682,118216225,118213439,118230135,118213029,118206425,118217214,118210315,118214144,118212855,118225768,118210737,118231508,118208360,118212577,118234636,118228062
GO:0006260	DNA replication	biological_process	0.22063	1	159	6525	550	24278	118222507,118229533,118231822,118214141,118216967,118218729,118235212,118229835,118219447,118234937,118214066,118226074,118217050,118211535,118230275,118213878,118216640,118213439,118219993,118207662,118222469,118219851,118230215,118225778,118210213,118226829,118225886,118223215,118211484,118218356,118214620,118231678,118213966,118209248,118214084,118206795,118217995,118216831,118231176,118223690…
GO:0009295	nucleoid	cellular_component	0.22104	1	5	6525	12	24278	1.18209e+44
GO:0044406	adhesion of symbiont to host	biological_process	0.22228	1	10	6525	28	24278	1.18207e+89
GO:0039694	viral RNA genome replication	biological_process	0.22254	1	1	6525	1	24278	118217291
GO:0039703	RNA replication	biological_process	0.22254	1	1	6525	1	24278	118217291
GO:0000186	activation of MAPKK activity	biological_process	0.22312	1	5	6525	13	24278	1.18228e+44
GO:0001678	cellular glucose homeostasis	biological_process	0.22312	1	5	6525	13	24278	1.18234e+44
GO:0008343	adult feeding behavior	biological_process	0.22312	1	5	6525	13	24278	1.18212e+44
GO:0030534	adult behavior	biological_process	0.22312	1	5	6525	13	24278	1.18234e+44
GO:0032094	response to food	biological_process	0.22312	1	5	6525	13	24278	1.18234e+44
GO:0032095	regulation of response to food	biological_process	0.22312	1	5	6525	13	24278	1.18234e+44
GO:0032096	negative regulation of response to food	biological_process	0.22312	1	5	6525	13	24278	1.18212e+44
GO:0032098	regulation of appetite	biological_process	0.22312	1	5	6525	13	24278	1.18234e+44
GO:0032099	negative regulation of appetite	biological_process	0.22312	1	5	6525	13	24278	1.18234e+44
GO:0032104	regulation of response to extracellular stimulus	biological_process	0.22312	1	5	6525	13	24278	1.18214e+44
GO:0032105	negative regulation of response to extracellular stimulus	biological_process	0.22312	1	5	6525	13	24278	1.18234e+44
GO:0032107	regulation of response to nutrient levels	biological_process	0.22312	1	5	6525	13	24278	1.18234e+44
GO:0032108	negative regulation of response to nutrient levels	biological_process	0.22312	1	5	6525	13	24278	1.18212e+44
GO:0032147	activation of protein kinase activity	biological_process	0.22312	1	5	6525	13	24278	1.18234e+44
GO:0033500	carbohydrate homeostasis	biological_process	0.22312	1	5	6525	13	24278	1.18228e+44
GO:0033674	positive regulation of kinase activity	biological_process	0.22312	1	5	6525	13	24278	1.18234e+44
GO:0042593	glucose homeostasis	biological_process	0.22312	1	5	6525	13	24278	1.18212e+44
GO:0044708	single-organism behavior	biological_process	0.22312	1	5	6525	13	24278	1.18228e+44
GO:0045860	positive regulation of protein kinase activity	biological_process	0.22312	1	5	6525	13	24278	1.18212e+44
GO:0051347	positive regulation of transferase activity	biological_process	0.22312	1	5	6525	13	24278	1.18214e+44
GO:0016758	transferase activity, transferring hexosyl groups	molecular_function	0.22349	1	79	6525	267	24278	118206747,118208365,118231096,118212367,118217733,118222370,118229040,118210577,118235058,118207563,118228416,118212257,118210970,118236231,118224285,118237554,118217044,118217995,118233086,118208281,118231854,118213361,118224570,118212966,118221334,118207666,118208889,118213113,118206627,118218242,118234092,118208417,118215556,118221262,118232199,118216039,118237443,118234966,118215602,118237179…
GO:0005186	pheromone activity	molecular_function	0.2235	1	12	6525	35	24278	1.18226e+107
GO:0004564	beta-fructofuranosidase activity	molecular_function	0.22368	1	5	6525	12	24278	1.18225e+44
GO:0004575	sucrose alpha-glucosidase activity	molecular_function	0.22368	1	5	6525	12	24278	1.18209e+44
GO:0090599	alpha-glucosidase activity	molecular_function	0.22368	1	5	6525	12	24278	1.18226e+44
GO:0031411	gas vesicle	cellular_component	0.22383	1	7	6525	18	24278	1.18222e+62
GO:0048308	organelle inheritance	biological_process	0.22443	1	6	6525	15	24278	1.18219e+53
GO:0010563	negative regulation of phosphorus metabolic process	biological_process	0.22567	1	5	6525	12	24278	1.18209e+44
GO:0045936	negative regulation of phosphate metabolic process	biological_process	0.22567	1	5	6525	12	24278	1.18209e+44
GO:0007007	inner mitochondrial membrane organization	biological_process	0.22602	1	3	6525	6	24278	1.18215e+26
GO:0042407	cristae formation	biological_process	0.22602	1	3	6525	6	24278	1.18222e+26
GO:0044284	mitochondrial crista junction	cellular_component	0.22602	1	3	6525	6	24278	1.18215e+26
GO:0061617	MICOS complex	cellular_component	0.22602	1	3	6525	6	24278	1.18222e+26
GO:0009678	hydrogen-translocating pyrophosphatase activity	molecular_function	0.22617	1	3	6525	6	24278	1.18207e+26
GO:0000176	nuclear exosome (RNase complex)	cellular_component	0.22737	1	5	6525	12	24278	1.18235e+44
GO:0002764	immune response-regulating signaling pathway	biological_process	0.22886	1	6	6525	16	24278	1.18208e+53
GO:0051861	glycolipid binding	molecular_function	0.22907	1	8	6525	22	24278	1.18223e+71
GO:0009416	response to light stimulus	biological_process	0.2297	1	5	6525	12	24278	1.18228e+44
GO:0042470	melanosome	cellular_component	0.23001	1	9	6525	26	24278	1.1823e+80
GO:0048770	pigment granule	cellular_component	0.23001	1	9	6525	26	24278	1.1823e+80
GO:0016714	oxidoreductase activity, acting on paired donors, with incorporation or reduction of molecular oxygen, reduced pteridine as one donor, and incorporation of one atom of oxygen	molecular_function	0.23038	1	10	6525	28	24278	1.18225e+89
GO:0009628	response to abiotic stimulus	biological_process	0.23121	1	15	6525	43	24278	1.18227e+134
GO:0031412	gas vesicle organization	biological_process	0.23126	1	9	6525	25	24278	1.18228e+80
GO:0044030	regulation of DNA methylation	biological_process	0.23131	1	2	6525	3	24278	1.18235e+17
GO:0044550	secondary metabolite biosynthetic process	biological_process	0.23271	1	12	6525	35	24278	1.18217e+107
GO:0006997	nucleus organization	biological_process	0.23326	1	5	6525	13	24278	1.18217e+44
GO:0009916	alternative oxidase activity	molecular_function	0.23532	1	3	6525	6	24278	1.1822e+26
GO:0006779	porphyrin-containing compound biosynthetic process	biological_process	0.23564	1	17	6525	51	24278	1.18233e+152
GO:0005794	Golgi apparatus	cellular_component	0.23592	1	49	6525	162	24278	118206747,118211856,118233950,118215602,118216376,118230422,118214010,118223073,118237321,118230990,118212367,118209032,118232002,118230192,118236711,118213624,118221538,118235399,118226348,118223989,118235767,118228416,118231453,118225157,118232075,118211564,118222506,118225995,118207707,118211389,118219764,118213722,118217044,118226818,118234374,118218824,118212355,118229105,118213361,118229181…
GO:0015238	drug transmembrane transporter activity	molecular_function	0.2373	1	6	6525	16	24278	1.18235e+53
GO:0090484	drug transporter activity	molecular_function	0.2373	1	6	6525	16	24278	1.18235e+53
GO:0015291	secondary active transmembrane transporter activity	molecular_function	0.23853	1	43	6525	140	24278	118215332,118219107,118213589,118228864,118223257,118234757,118225686,118208037,118226890,118226460,118210930,118224212,118210970,118233684,118227629,118233766,118226348,118226206,118229163,118219023,118224254,118235935,118235489,118209643,118233685,118225369,118229181,118209634,118209635,118208355,118235488,118219229,118210964,118215926,118207758,118209639,118209633,118216754,118219704,118218514…
GO:0071944	cell periphery	cellular_component	0.23877	1	248	6525	871	24278	118216228,118208621,118235428,118210872,118216641,118225968,118216775,118211389,118236446,118210709,118237360,118225725,118218664,118214057,118211978,118231588,118207183,118231073,118214400,118208375,118226011,118235860,118209510,118220808,118236311,118221208,118210595,118228196,118237066,118225934,118228891,118217088,118212410,118234701,118211203,118214624,118220177,118219799,118207811,118230990…
GO:0007029	endoplasmic reticulum organization	biological_process	0.23893	1	10	6525	29	24278	1.18211e+89
GO:0004177	aminopeptidase activity	molecular_function	0.23914	1	10	6525	30	24278	1.18224e+89
GO:0004175	endopeptidase activity	molecular_function	0.24023	1	264	6525	940	24278	118222523,118232937,118219157,118227012,118224113,118225776,118236449,118213023,118210527,118208888,118234467,118216952,118217750,118228858,118226801,118229751,118225732,118229121,118221920,118209329,118217304,118217367,118209327,118230348,118221690,118208543,118210532,118235877,118233113,118222785,118237424,118237224,118232828,118215576,118222940,118226824,118215414,118211591,118216117,118221152…
GO:0005253	anion channel activity	molecular_function	0.24072	1	6	6525	15	24278	1.18214e+53
GO:0007167	enzyme linked receptor protein signaling pathway	biological_process	0.24131	1	17	6525	49	24278	1.18207e+152
GO:0007169	transmembrane receptor protein tyrosine kinase signaling pathway	biological_process	0.24131	1	17	6525	49	24278	1.18233e+152
GO:0043087	regulation of GTPase activity	biological_process	0.24148	1	10	6525	26	24278	1.18235e+89
GO:0015995	chlorophyll biosynthetic process	biological_process	0.24195	1	6	6525	15	24278	1.18233e+53
GO:0044430	cytoskeletal part	cellular_component	0.24245	1	171	6525	585	24278	118234730,118212857,118214249,118226760,118232101,118229402,118217765,118211265,118207048,118235585,118222869,118229081,118214757,118221073,118217743,118218729,118224956,118220372,118214066,118221100,118211930,118229533,118216505,118213338,118220871,118219002,118218366,118215775,118224805,118220534,118226971,118219993,118211856,118228189,118232039,118210697,118226370,118219227,118222786,118221415…
GO:0017004	cytochrome complex assembly	biological_process	0.2431	1	16	6525	49	24278	1.1823e+143
GO:0044057	regulation of system process	biological_process	0.2442	1	11	6525	33	24278	1.18212e+98
GO:0016725	oxidoreductase activity, acting on CH or CH2 groups	molecular_function	0.24471	1	4	6525	9	24278	1.18217e+35
GO:0000394	RNA splicing, via endonucleolytic cleavage and ligation	biological_process	0.24522	1	4	6525	10	24278	1.18237e+35
GO:0006388	tRNA splicing, via endonucleolytic cleavage and ligation	biological_process	0.24522	1	4	6525	10	24278	1.18228e+35
GO:0006304	DNA modification	biological_process	0.24622	1	18	6525	56	24278	1.1821e+161
GO:0006109	regulation of carbohydrate metabolic process	biological_process	0.24688	1	4	6525	10	24278	1.18229e+35
GO:0051094	positive regulation of developmental process	biological_process	0.24734	1	8	6525	22	24278	1.18231e+71
GO:0015711	organic anion transport	biological_process	0.24781	1	42	6525	139	24278	118226460,118222446,118222574,118226737,118223257,118215007,118224695,118228864,118220177,118215332,118232197,118221954,118229141,118226206,118215427,118221910,118229147,118217073,118226856,118232898,118215926,118206652,118222487,118218352,118229944,118208184,118206335,118234374,118231696,118236457,118234361,118225767,118225369,118222218,118228203,118231493,118209229,118217922,118223723,118208375…
GO:0006470	protein dephosphorylation	biological_process	0.24792	1	53	6525	175	24278	118235777,118224667,118221044,118216383,118234509,118233668,118226584,118218087,118229204,118218427,118222487,118224188,118221045,118219141,118218992,118234317,118211951,118229467,118226102,118226898,118215237,118227313,118227623,118207977,118234881,118224731,118209442,118233168,118211327,118213339,118214064,118234757,118233902,118206412,118227791,118210864,118222606,118231021,118214951,118234132…
GO:0008236	serine-type peptidase activity	molecular_function	0.24937	1	111	6525	393	24278	118222295,118224583,118212222,118223665,118234490,118211591,118215414,118236935,118206517,118207530,118226207,118216117,118234361,118224271,118226601,118224761,118230228,118225000,118226966,118237356,118233408,118234738,118209856,118215559,118234423,118233715,118228452,118217993,118212216,118218362,118216733,118225194,118217330,118218318,118215061,118232311,118227154,118235511,118212648,118208412…
GO:0017171	serine hydrolase activity	molecular_function	0.24937	1	111	6525	393	24278	118216467,118219385,118208038,118217723,118216198,118214123,118218095,118235637,118207214,118211932,118221750,118218824,118208184,118222523,118224618,118224359,118221920,118222207,118208375,118229121,118219856,118208335,118230005,118219716,118235964,118216728,118217750,118225732,118214632,118229751,118226520,118221690,118208628,118225193,118214011,118230348,118209327,118216071,118210645,118223028…
GO:0001539	cilium or flagellum-dependent cell motility	biological_process	0.25019	1	12	6525	36	24278	118216428,118213306,118222604,118228406,118237514,118223333,118233219,118225992,XLOC_265637,118217691,118210784,118209172
GO:0097588	archaeal or bacterial-type flagellum-dependent cell motility	biological_process	0.25019	1	12	6525	36	24278	118222604,118228406,118237514,118216428,118213306,118233219,118223333,XLOC_265637,118225992,118217691,118209172,118210784
GO:0005523	tropomyosin binding	molecular_function	0.25106	1	4	6525	10	24278	1.18232e+35
GO:0051694	pointed-end actin filament capping	biological_process	0.25106	1	4	6525	10	24278	1.18232e+35
GO:0005520	insulin-like growth factor binding	molecular_function	0.25131	1	16	6525	52	24278	1.18237e+143
GO:0009289	pilus	cellular_component	0.25289	1	4	6525	10	24278	1.1822e+35
GO:0050853	B cell receptor signaling pathway	biological_process	0.25462	1	4	6525	10	24278	1.18211e+35
GO:0016682	oxidoreductase activity, acting on diphenols and related substances as donors, oxygen as acceptor	molecular_function	0.25497	1	6	6525	16	24278	1.1822e+53
GO:0071554	cell wall organization or biogenesis	biological_process	0.25596	1	18	6525	53	24278	1.18228e+161
GO:0001765	membrane raft assembly	biological_process	0.2565	1	6	6525	17	24278	1.18212e+53
GO:0031579	membrane raft organization	biological_process	0.2565	1	6	6525	17	24278	1.18212e+53
GO:0044854	plasma membrane raft assembly	biological_process	0.2565	1	6	6525	17	24278	1.18212e+53
GO:0044857	plasma membrane raft organization	biological_process	0.2565	1	6	6525	17	24278	1.18226e+53
GO:0070836	caveola assembly	biological_process	0.2565	1	6	6525	17	24278	1.18211e+53
GO:0007340	acrosome reaction	biological_process	0.25654	1	6	6525	15	24278	1.18217e+53
GO:0017156	calcium ion-dependent exocytosis	biological_process	0.25654	1	6	6525	15	24278	1.18235e+53
GO:0010923	negative regulation of phosphatase activity	biological_process	0.25677	1	1	6525	1	24278	118233168
GO:0035305	negative regulation of dephosphorylation	biological_process	0.25677	1	1	6525	1	24278	118233168
GO:0035308	negative regulation of protein dephosphorylation	biological_process	0.25677	1	1	6525	1	24278	118233168
GO:0044219	host cell plasmodesma	cellular_component	0.25697	1	1	6525	1	24278	118213843
GO:0007618	mating	biological_process	0.25707	1	10	6525	28	24278	118211930,118226801,118214531,118220424,118222231,118226824,118217558,XLOC_283220,118206297,118232297
GO:0008901	ferredoxin hydrogenase activity	molecular_function	0.25832	1	1	6525	1	24278	118229228
GO:0016699	oxidoreductase activity, acting on hydrogen as donor, iron-sulfur protein as acceptor	molecular_function	0.25832	1	1	6525	1	24278	118229228
GO:0007009	plasma membrane organization	biological_process	0.25852	1	18	6525	58	24278	1.18235e+161
GO:0032886	regulation of microtubule-based process	biological_process	0.25889	1	14	6525	44	24278	1.18223e+125
GO:0070507	regulation of microtubule cytoskeleton organization	biological_process	0.25889	1	14	6525	44	24278	1.18236e+125
GO:0016037	light absorption	biological_process	0.25911	1	1	6525	1	24278	118208359
GO:0031404	chloride ion binding	molecular_function	0.25911	1	1	6525	1	24278	118208359
GO:0008829	dCTP deaminase activity	molecular_function	0.26083	1	1	6525	1	24278	118223888
GO:0005143	interleukin-12 receptor binding	molecular_function	0.26093	1	3	6525	7	24278	1.18224e+26
GO:0006771	riboflavin metabolic process	biological_process	0.26108	1	3	6525	7	24278	1.18232e+26
GO:0009231	riboflavin biosynthetic process	biological_process	0.26108	1	3	6525	7	24278	1.18223e+26
GO:0042726	flavin-containing compound metabolic process	biological_process	0.26108	1	3	6525	7	24278	1.18212e+26
GO:0042727	flavin-containing compound biosynthetic process	biological_process	0.26108	1	3	6525	7	24278	1.18212e+26
GO:0008818	cobalamin 5'-phosphate synthase activity	molecular_function	0.26119	1	1	6525	1	24278	118217261
GO:0051073	adenosylcobinamide-GDP ribazoletransferase activity	molecular_function	0.26119	1	1	6525	1	24278	118217261
GO:0003842	1-pyrroline-5-carboxylate dehydrogenase activity	molecular_function	0.26152	1	1	6525	1	24278	118210735
GO:0032400	melanosome localization	biological_process	0.2619	1	2	6525	4	24278	1.1822e+17
GO:0032401	establishment of melanosome localization	biological_process	0.2619	1	2	6525	4	24278	1.1822e+17
GO:0032402	melanosome transport	biological_process	0.2619	1	2	6525	4	24278	1.18234e+17
GO:0033059	cellular pigmentation	biological_process	0.2619	1	2	6525	4	24278	1.18234e+17
GO:0043473	pigmentation	biological_process	0.2619	1	2	6525	4	24278	1.18234e+17
GO:0051875	pigment granule localization	biological_process	0.2619	1	2	6525	4	24278	1.1822e+17
GO:0051904	pigment granule transport	biological_process	0.2619	1	2	6525	4	24278	1.18234e+17
GO:0051905	establishment of pigment granule localization	biological_process	0.2619	1	2	6525	4	24278	1.1822e+17
GO:0009439	cyanate metabolic process	biological_process	0.26199	1	1	6525	1	24278	118228284
GO:0042555	MCM complex	cellular_component	0.26286	1	1	6525	1	24278	118211941
GO:0008715	CDP-diacylglycerol diphosphatase activity	molecular_function	0.26299	1	1	6525	1	24278	118211383
GO:0048869	cellular developmental process	biological_process	0.26311	1	92	6525	314	24278	118225636,118218895,118216735,118218931,118235743,118216422,118221326,118219816,118207750,118214940,118211907,118208315,118229813,118206654,118206530,118210965,118227733,118229733,118230200,118212161,118206579,118236021,118235170,118207304,118219519,118226789,118211897,118218919,118213211,118218890,118208976,118217088,118225934,118232096,118222228,118216228,118235428,118227124,118211389,118208864…
GO:0000372	Group I intron splicing	biological_process	0.26327	1	2	6525	3	24278	1.18217e+17
GO:0000376	RNA splicing, via transesterification reactions with guanosine as nucleophile	biological_process	0.26327	1	2	6525	3	24278	1.18217e+17
GO:0007610	behavior	biological_process	0.26333	1	21	6525	66	24278	118226824,118222231,118233957,118217558,118210147,118220375,118212348,118214094,118220424,118228092,118214531,118213371,118211930,118209188,118206297,XLOC_283220,118232297,118212826,118236332,118218115,118217812
GO:0040007	growth	biological_process	0.26376	1	37	6525	127	24278	118221567,118237325,118208941,118209995,118211251,118210360,118237226,118210094,118211390,118235405,118210797,118237424,118227395,118235272,118213432,118206363,118212755,118229873,118232546,118210590,118233577,118225371,118225903,118210713,118224517,118211081,118207355,118223694,118208836,118229069,118223104,118217750,118222516,118216266,118231120,118219836,118228338
GO:0006558	L-phenylalanine metabolic process	biological_process	0.26393	1	2	6525	4	24278	1.18226e+17
GO:1902221	erythrose 4-phosphate/phosphoenolpyruvate family amino acid metabolic process	biological_process	0.26393	1	2	6525	4	24278	1.18226e+17
GO:0045926	negative regulation of growth	biological_process	0.26431	1	1	6525	1	24278	118224517
GO:0008759	UDP-3-O-[3-hydroxymyristoyl] N-acetylglucosamine deacetylase activity	molecular_function	0.26504	1	1	6525	1	24278	118234710
GO:0005521	lamin binding	molecular_function	0.26528	1	1	6525	1	24278	118232195
GO:0043176	amine binding	molecular_function	0.26544	1	1	6525	1	24278	118216047
GO:0019904	protein domain specific binding	molecular_function	0.26588	1	7	6525	20	24278	1.18223e+62
GO:0007617	mating behavior	biological_process	0.26617	1	9	6525	25	24278	118214531,118211930,118222231,118226824,118220424,118217558,118232297,118206297,XLOC_283220
GO:0019098	reproductive behavior	biological_process	0.26617	1	9	6525	25	24278	118206297,XLOC_283220,118232297,118217558,118220424,118226824,118222231,118211930,118214531
GO:0044705	multi-organism reproductive behavior	biological_process	0.26617	1	9	6525	25	24278	118214531,118211930,118222231,118226824,118220424,118217558,118232297,XLOC_283220,118206297
GO:0009306	protein secretion	biological_process	0.26621	1	17	6525	52	24278	118226764,118220782,118218347,118211612,XLOC_086918,118208319,118221159,118214908,118217064,118213818,118234735,118226601,118213593,118225468,118209436,118207373,118210361
GO:0010257	NADH dehydrogenase complex assembly	biological_process	0.26664	1	2	6525	4	24278	1.18216e+17
GO:0032981	mitochondrial respiratory chain complex I assembly	biological_process	0.26664	1	2	6525	4	24278	1.18216e+17
GO:0097031	mitochondrial respiratory chain complex I biogenesis	biological_process	0.26664	1	2	6525	4	24278	1.18216e+17
GO:0015297	antiporter activity	molecular_function	0.26692	1	13	6525	38	24278	1.18233e+116
GO:0048513	organ development	biological_process	0.26778	1	13	6525	40	24278	1.18235e+116
GO:0008725	DNA-3-methyladenine glycosylase activity	molecular_function	0.2683	1	1	6525	1	24278	118218318
GO:0043733	DNA-3-methylbase glycosylase activity	molecular_function	0.2683	1	1	6525	1	24278	118218318
GO:0044248	cellular catabolic process	biological_process	0.26853	1	204	6525	732	24278	118220738,118228069,118226857,118227991,118213950,118224566,118224783,118209611,118222231,118234592,118215209,118234952,118221140,118226451,118209859,118222873,118228788,118210390,118224761,118235448,118223335,118214427,118212966,118210553,118232480,118210270,118222218,118227353,118216826,118231797,118212714,118232002,118219375,118209728,118209194,118207182,118236034,118233413,118226210,118216376…
GO:0000346	transcription export complex	cellular_component	0.26991	1	8	6525	24	24278	1.18207e+71
GO:0000445	THO complex part of transcription export complex	cellular_component	0.26991	1	8	6525	24	24278	1.18207e+71
GO:0016311	dephosphorylation	biological_process	0.27036	1	57	6525	191	24278	118234132,118214951,118222967,118222742,118210970,118231021,118222606,118230608,118208044,118221801,118213718,118217694,118206818,118218088,118227379,118225026,118234867,118233168,118209442,118234881,118224731,118213339,118211327,118214064,118227791,118206412,118233902,118210864,118234757,118234317,118208238,118208463,118226102,118211951,118211947,118229467,118215237,118226898,118227313,118207977…
GO:0002097	tRNA wobble base modification	biological_process	0.27164	1	2	6525	4	24278	1.18224e+17
GO:0002098	tRNA wobble uridine modification	biological_process	0.27164	1	2	6525	4	24278	1.1822e+17
GO:0004549	tRNA-specific ribonuclease activity	molecular_function	0.27169	1	7	6525	20	24278	1.18214e+62
GO:0004520	endodeoxyribonuclease activity	molecular_function	0.27171	1	22	6525	70	24278	1.1821e+197
GO:0009512	cytochrome b6f complex	cellular_component	0.2724	1	9	6525	26	24278	1.18207e+80
GO:0015293	symporter activity	molecular_function	0.27269	1	27	6525	88	24278	118226460,118215926,118208355,118226890,118219229,118208037,118209634,118219107,118228864,118209635,118215332,118225369,118229181,118233685,118232781,118219023,118209643,118228203,118226206,118226348,118233684,118227629,118210970,118209639,118224212,118209633,118216754
GO:0015294	solute:cation symporter activity	molecular_function	0.27269	1	27	6525	88	24278	118219023,118232781,118209643,118228203,118226206,118226348,118227629,118233684,118210970,118209639,118216754,118209633,118224212,118226460,118215926,118208355,118226890,118219229,118208037,118209634,118219107,118228864,118209635,118225369,118229181,118215332,118233685
GO:0015849	organic acid transport	biological_process	0.27315	1	41	6525	137	24278	118206335,118234374,118231696,118234361,118225767,118225369,118226856,118232898,118215926,118206652,118222487,118218352,118229944,118208184,118217922,118223723,118208375,118216754,118231279,118222218,118228203,118231493,118209229,118228864,118220177,118215332,118232197,118226460,118222446,118222574,118226737,118223257,118215007,118224695,118221910,118229147,118217073,118221954,118229141,118215427…
GO:0046942	carboxylic acid transport	biological_process	0.27315	1	41	6525	137	24278	118221954,118226206,118229141,118215427,118229147,118217073,118221910,118215007,118224695,118223257,118222574,118226737,118226460,118222446,118220177,118215332,118232197,118228864,118231493,118209229,118228203,118222218,118216754,118231279,118223723,118208375,118217922,118208184,118218352,118229944,118232898,118206652,118215926,118222487,118226856,118225369,118225767,118234361,118231696,118206335…
GO:0001897	cytolysis by symbiont of host cells	biological_process	0.27378	1	5	6525	13	24278	1.18216e+44
GO:0019836	hemolysis by symbiont of host erythrocytes	biological_process	0.27378	1	5	6525	13	24278	1.18213e+44
GO:0043047	single-stranded telomeric DNA binding	molecular_function	0.27404	1	2	6525	4	24278	1.18233e+17
GO:0009235	cobalamin metabolic process	biological_process	0.27408	1	14	6525	43	24278	118217995,118226421,118223959,118216416,118219761,118217261,118232106,118208504,118235804,118237072,XLOC_168682,118215706,118213014,118214698
GO:0005923	bicellular tight junction	cellular_component	0.27434	1	3	6525	7	24278	1.18218e+26
GO:0043296	apical junction complex	cellular_component	0.27434	1	3	6525	7	24278	1.18218e+26
GO:0070160	occluding junction	cellular_component	0.27434	1	3	6525	7	24278	1.18213e+26
GO:0004016	adenylate cyclase activity	molecular_function	0.27467	1	8	6525	22	24278	1.18217e+71
GO:0045087	innate immune response	biological_process	0.27511	1	5	6525	13	24278	1.18222e+44
GO:0009294	DNA mediated transformation	biological_process	0.27599	1	3	6525	6	24278	1.18226e+26
GO:0030420	establishment of competence for transformation	biological_process	0.27599	1	3	6525	6	24278	1.18226e+26
GO:0051240	positive regulation of multicellular organismal process	biological_process	0.27742	1	17	6525	52	24278	1.18229e+152
GO:0043752	adenosylcobinamide kinase activity	molecular_function	0.27746	1	2	6525	4	24278	1.18226e+17
GO:0050568	protein-glutamine glutaminase activity	molecular_function	0.27758	1	1	6525	1	24278	118222295
GO:0001518	voltage-gated sodium channel complex	cellular_component	0.2776	1	8	6525	21	24278	1.18223e+71
GO:0005248	voltage-gated sodium channel activity	molecular_function	0.2776	1	8	6525	21	24278	1.18217e+71
GO:0034706	sodium channel complex	cellular_component	0.2776	1	8	6525	21	24278	1.18212e+71
GO:0016298	lipase activity	molecular_function	0.27791	1	19	6525	57	24278	1.18236e+170
GO:0070876	SOSS complex	cellular_component	0.27812	1	2	6525	4	24278	1.18228e+17
GO:0019229	regulation of vasoconstriction	biological_process	0.2783	1	6	6525	16	24278	1.18222e+53
GO:0042310	vasoconstriction	biological_process	0.2783	1	6	6525	16	24278	1.18227e+53
GO:0015721	bile acid and bile salt transport	biological_process	0.2784	1	4	6525	10	24278	1.1822e+35
GO:0046982	protein heterodimerization activity	molecular_function	0.2784	1	4	6525	10	24278	1.1822e+35
GO:0008410	CoA-transferase activity	molecular_function	0.28038	1	2	6525	4	24278	1.1822e+17
GO:0000377	RNA splicing, via transesterification reactions with bulged adenosine as nucleophile	biological_process	0.28121	1	26	6525	85	24278	118216933,118217184,118208190,118210784,118215650,118216387,118235743,118210647,118206249,118227140,118223749,118222289,118235763,118218161,118231104,118216561,118227991,118212979,118231124,118211856,118214005,118223305,118212714,118210871,118229294,118210872
GO:0000398	mRNA splicing, via spliceosome	biological_process	0.28121	1	26	6525	85	24278	118210871,118212714,118210872,118229294,118227991,118231104,118216561,118223305,118231124,118212979,118211856,118214005,118206249,118235743,118210647,118235763,118218161,118227140,118223749,118222289,118217184,118210784,118216933,118208190,118216387,118215650
GO:0016125	sterol metabolic process	biological_process	0.28201	1	7	6525	20	24278	1.18227e+62
GO:0016715	oxidoreductase activity, acting on paired donors, with incorporation or reduction of molecular oxygen, reduced ascorbate as one donor, and incorporation of one atom of oxygen	molecular_function	0.28265	1	3	6525	7	24278	1.18211e+26
GO:0016780	phosphotransferase activity, for other substituted phosphate groups	molecular_function	0.28332	1	9	6525	26	24278	1.18231e+80
GO:0006873	cellular ion homeostasis	biological_process	0.28356	1	23	6525	74	24278	118215390,118212855,118217214,118210315,118214144,118234636,118212577,118236711,118228062,118225768,118231508,118210737,118208360,118236393,118209433,118229820,118213439,118230135,118213029,118206425,118219691,XLOC_168682,118216225
GO:0006875	cellular metal ion homeostasis	biological_process	0.28356	1	23	6525	74	24278	118217214,118210315,118214144,118215390,118212855,118225768,118231508,118210737,118208360,118234636,118212577,118236711,118228062,118209433,118236393,118229820,XLOC_168682,118216225,118213439,118206425,118230135,118213029,118219691
GO:0030003	cellular cation homeostasis	biological_process	0.28356	1	23	6525	74	24278	118229820,118236393,118209433,118230135,118206425,118213029,118219691,118213439,118216225,XLOC_168682,118215390,118212855,118210315,118214144,118217214,118228062,118212577,118234636,118236711,118208360,118225768,118231508,118210737
GO:0005977	glycogen metabolic process	biological_process	0.28368	1	3	6525	7	24278	1.18219e+26
GO:0005978	glycogen biosynthetic process	biological_process	0.28368	1	3	6525	7	24278	1.18236e+26
GO:0004112	cyclic-nucleotide phosphodiesterase activity	molecular_function	0.28411	1	22	6525	69	24278	1.18217e+197
GO:0015109	chromate transmembrane transporter activity	molecular_function	0.28414	1	2	6525	4	24278	1.18211e+17
GO:0015703	chromate transport	biological_process	0.28414	1	2	6525	4	24278	1.18225e+17
GO:0016286	small conductance calcium-activated potassium channel activity	molecular_function	0.28658	1	4	6525	10	24278	1.18226e+35
GO:0030955	potassium ion binding	molecular_function	0.28666	1	13	6525	39	24278	1.18207e+116
GO:0031420	alkali metal ion binding	molecular_function	0.28666	1	13	6525	39	24278	1.18227e+116
GO:0008531	riboflavin kinase activity	molecular_function	0.28684	1	2	6525	4	24278	1.18232e+17
GO:0008814	citrate CoA-transferase activity	molecular_function	0.28689	1	1	6525	1	24278	118225965
GO:0009346	citrate lyase complex	cellular_component	0.28689	1	1	6525	1	24278	118225965
GO:0016661	oxidoreductase activity, acting on other nitrogenous compounds as donors	molecular_function	0.2869	1	5	6525	14	24278	1.18207e+44
GO:0098809	nitrite reductase activity	molecular_function	0.2869	1	5	6525	14	24278	1.18207e+44
GO:0097351	toxin-antitoxin pair type II binding	molecular_function	0.28774	1	1	6525	1	24278	118227395
GO:0046422	violaxanthin de-epoxidase activity	molecular_function	0.28856	1	2	6525	4	24278	1.18213e+17
GO:1901698	response to nitrogen compound	biological_process	0.28976	1	5	6525	14	24278	1.18236e+44
GO:0042325	regulation of phosphorylation	biological_process	0.2903	1	13	6525	41	24278	1.18212e+116
GO:0051273	beta-glucan metabolic process	biological_process	0.29034	1	5	6525	14	24278	1.18236e+44
GO:0051205	protein insertion into membrane	biological_process	0.29054	1	5	6525	14	24278	1.18227e+44
GO:0000272	polysaccharide catabolic process	biological_process	0.29061	1	6	6525	17	24278	1.18234e+53
GO:0005134	interleukin-2 receptor binding	molecular_function	0.29134	1	1	6525	1	24278	118219179
GO:0010374	stomatal complex development	biological_process	0.29141	1	2	6525	4	24278	1.18219e+17
GO:0048580	regulation of post-embryonic development	biological_process	0.29141	1	2	6525	4	24278	1.18219e+17
GO:0048582	positive regulation of post-embryonic development	biological_process	0.29141	1	2	6525	4	24278	1.18219e+17
GO:0090558	plant epidermis development	biological_process	0.29141	1	2	6525	4	24278	1.18231e+17
GO:2000038	regulation of stomatal complex development	biological_process	0.29141	1	2	6525	4	24278	1.18231e+17
GO:2000123	positive regulation of stomatal complex development	biological_process	0.29141	1	2	6525	4	24278	1.18231e+17
GO:0008455	alpha-1,6-mannosylglycoprotein 2-beta-N-acetylglucosaminyltransferase activity	molecular_function	0.29193	1	4	6525	10	24278	1.18214e+35
GO:0060627	regulation of vesicle-mediated transport	biological_process	0.29222	1	6	6525	17	24278	1.18227e+53
GO:0019220	regulation of phosphate metabolic process	biological_process	0.29333	1	16	6525	52	24278	1.18234e+143
GO:0051174	regulation of phosphorus metabolic process	biological_process	0.29333	1	16	6525	52	24278	1.18234e+143
GO:0000090	mitotic anaphase	biological_process	0.29338	1	7	6525	21	24278	1.18223e+62
GO:0051322	anaphase	biological_process	0.29338	1	7	6525	21	24278	1.18223e+62
GO:0043281	regulation of cysteine-type endopeptidase activity involved in apoptotic process	biological_process	0.29401	1	8	6525	24	24278	1.18208e+71
GO:2000116	regulation of cysteine-type endopeptidase activity	biological_process	0.29401	1	8	6525	24	24278	1.18208e+71
GO:0000772	mating pheromone activity	molecular_function	0.2942	1	8	6525	23	24278	1.18213e+71
GO:0030131	clathrin adaptor complex	cellular_component	0.29622	1	8	6525	22	24278	1.18227e+71
GO:0016841	ammonia-lyase activity	molecular_function	0.29626	1	2	6525	4	24278	1.18228e+17
GO:0009893	positive regulation of metabolic process	biological_process	0.29669	1	82	6525	286	24278	118223005,118220131,118209462,118216556,118213412,118208532,118216931,XLOC_265637,118210520,118229197,118237477,118211564,118230534,118235869,118213339,118210325,118218435,118206759,118237153,118231403,118227146,118226376,118211119,118233193,118228092,118221920,118233790,118233476,118236667,118236491,118224190,118217785,118208259,118230887,118212348,118221076,118221015,118217348,118237154,1182325…
GO:0004526	ribonuclease P activity	molecular_function	0.29671	1	6	6525	17	24278	1.18227e+53
GO:0009250	glucan biosynthetic process	biological_process	0.29725	1	6	6525	17	24278	1.18237e+53
GO:0016903	oxidoreductase activity, acting on the aldehyde or oxo group of donors	molecular_function	0.29726	1	17	6525	55	24278	1.18234e+152
GO:0005618	cell wall	cellular_component	0.29756	1	11	6525	31	24278	1.18222e+98
GO:0001932	regulation of protein phosphorylation	biological_process	0.29797	1	11	6525	34	24278	1.18228e+98
GO:0000922	spindle pole	cellular_component	0.29826	1	8	6525	23	24278	1.18219e+71
GO:0047869	dimethylpropiothetin dethiomethylase activity	molecular_function	0.29828	1	2	6525	4	24278	1.18221e+17
GO:0008643	carbohydrate transport	biological_process	0.29846	1	23	6525	74	24278	1.18217e+206
GO:0015556	C4-dicarboxylate transmembrane transporter activity	molecular_function	0.29932	1	2	6525	4	24278	1.18231e+17
GO:0005212	structural constituent of eye lens	molecular_function	0.29991	1	4	6525	11	24278	1.1823e+35
GO:0030001	metal ion transport	biological_process	0.30067	1	224	6525	797	24278	118212866,118214454,118211123,118218687,118219519,118216956,118209327,118212612,118226806,118206394,118214468,118207668,118214720,118234905,118214010,118233051,118229076,118233312,118233245,118217543,118206530,118227329,118229197,118222173,118227217,118222785,118213017,118223119,118223503,118210737,118206333,118213639,118232851,118219236,118226353,118221910,118207293,118234714,XLOC_090711,1182243…
GO:0005326	neurotransmitter transporter activity	molecular_function	0.30088	1	17	6525	54	24278	1.18234e+152
GO:0005328	neurotransmitter:sodium symporter activity	molecular_function	0.30088	1	17	6525	54	24278	1.1821e+152
GO:0040011	locomotion	biological_process	0.30198	1	102	6525	354	24278	118207682,118222281,118216428,118211234,118235449,118232096,118223772,118220427,118217785,118214284,118220544,118213843,118234374,118227124,118230887,118213306,118227802,118228853,118208864,118230855,118217691,118221945,XLOC_283220,118226600,118231328,118232940,118225636,118222604,118209908,118211690,118209172,118208295,118226103,XLOC_265637,118216931,118231403,118216103,118218130,118223589,11820…
GO:0007129	synapsis	biological_process	0.30234	1	5	6525	14	24278	1.18207e+44
GO:0007130	synaptonemal complex assembly	biological_process	0.30234	1	5	6525	14	24278	1.18232e+44
GO:0045143	homologous chromosome segregation	biological_process	0.30234	1	5	6525	14	24278	1.18228e+44
GO:0070192	chromosome organization involved in meiosis	biological_process	0.30234	1	5	6525	14	24278	1.18217e+44
GO:0070193	synaptonemal complex organization	biological_process	0.30234	1	5	6525	14	24278	1.18208e+44
GO:0007268	synaptic transmission	biological_process	0.3024	1	6	6525	17	24278	1.18227e+53
GO:0015969	guanosine tetraphosphate metabolic process	biological_process	0.30336	1	1	6525	1	24278	118226898
GO:0034035	purine ribonucleoside bisphosphate metabolic process	biological_process	0.30336	1	1	6525	1	24278	118226898
GO:0019838	growth factor binding	molecular_function	0.30349	1	16	6525	54	24278	1.18211e+143
GO:0002682	regulation of immune system process	biological_process	0.30374	1	20	6525	66	24278	1.18212e+179
GO:0015016	[heparan sulfate]-glucosamine N-sulfotransferase activity	molecular_function	0.30391	1	3	6525	7	24278	1.18236e+26
GO:0034483	heparan sulfate sulfotransferase activity	molecular_function	0.30391	1	3	6525	7	24278	1.18236e+26
GO:0008239	dipeptidyl-peptidase activity	molecular_function	0.30396	1	6	6525	18	24278	1.18222e+53
GO:0000014	single-stranded DNA endodeoxyribonuclease activity	molecular_function	0.30451	1	3	6525	7	24278	1.18236e+26
GO:0032957	inositol trisphosphate metabolic process	biological_process	0.30477	1	2	6525	4	24278	1.18231e+17
GO:0043647	inositol phosphate metabolic process	biological_process	0.30477	1	2	6525	4	24278	1.18229e+17
GO:0047325	inositol tetrakisphosphate 1-kinase activity	molecular_function	0.30477	1	2	6525	4	24278	1.18229e+17
GO:0051765	inositol tetrakisphosphate kinase activity	molecular_function	0.30477	1	2	6525	4	24278	1.18231e+17
GO:0052725	inositol-1,3,4-trisphosphate 6-kinase activity	molecular_function	0.30477	1	2	6525	4	24278	1.18229e+17
GO:0052726	inositol-1,3,4-trisphosphate 5-kinase activity	molecular_function	0.30477	1	2	6525	4	24278	1.18229e+17
GO:0018106	peptidyl-histidine phosphorylation	biological_process	0.30534	1	2	6525	4	24278	1.18233e+17
GO:0018202	peptidyl-histidine modification	biological_process	0.30534	1	2	6525	4	24278	1.18233e+17
GO:0003689	DNA clamp loader activity	molecular_function	0.30572	1	2	6525	4	24278	1.18229e+17
GO:0005657	replication fork	cellular_component	0.30572	1	2	6525	4	24278	1.18235e+17
GO:0005663	DNA replication factor C complex	cellular_component	0.30572	1	2	6525	4	24278	1.18235e+17
GO:0033170	protein-DNA loading ATPase activity	molecular_function	0.30572	1	2	6525	4	24278	1.18229e+17
GO:0001533	cornified envelope	cellular_component	0.30604	1	4	6525	10	24278	1.18213e+35
GO:0055065	metal ion homeostasis	biological_process	0.30674	1	23	6525	75	24278	118213439,118230135,118206425,118213029,118219691,XLOC_168682,118216225,118236393,118209433,118229820,118212577,118234636,118236711,118228062,118225768,118210737,118231508,118208360,118215390,118212855,118217214,118210315,118214144
GO:0004114	3',5'-cyclic-nucleotide phosphodiesterase activity	molecular_function	0.30684	1	19	6525	60	24278	1.18223e+170
GO:0044091	membrane biogenesis	biological_process	0.3073	1	6	6525	18	24278	1.18212e+53
GO:0071709	membrane assembly	biological_process	0.3073	1	6	6525	18	24278	1.18226e+53
GO:0016153	urocanate hydratase activity	molecular_function	0.30892	1	3	6525	7	24278	1.18217e+26
GO:0048856	anatomical structure development	biological_process	0.31005	1	112	6525	386	24278	118210965,118223730,118227733,118236021,118212161,118206579,118211251,118223589,118206641,118207304,118235170,118211897,118219519,118225636,XLOC_283220,118221326,118216735,118231328,118216422,118235743,118219816,118207029,118207750,118214940,118235354,118226103,118223175,118211907,118208315,118216228,118235428,118219841,118227124,118212446,118211389,118208869,118228853,118208864,118218664,1182302…
GO:0047487	oligogalacturonide lyase activity	molecular_function	0.31078	1	2	6525	4	24278	1.18224e+17
GO:0008837	diaminopimelate epimerase activity	molecular_function	0.31199	1	2	6525	4	24278	1.18214e+17
GO:0006919	activation of cysteine-type endopeptidase activity involved in apoptotic process	biological_process	0.31336	1	6	6525	17	24278	1.18225e+53
GO:0010950	positive regulation of endopeptidase activity	biological_process	0.31336	1	6	6525	17	24278	1.18222e+53
GO:0010952	positive regulation of peptidase activity	biological_process	0.31336	1	6	6525	17	24278	1.18222e+53
GO:0031638	zymogen activation	biological_process	0.31336	1	6	6525	17	24278	1.18221e+53
GO:0043280	positive regulation of cysteine-type endopeptidase activity involved in apoptotic process	biological_process	0.31336	1	6	6525	17	24278	1.18227e+53
GO:0045862	positive regulation of proteolysis	biological_process	0.31336	1	6	6525	17	24278	1.18229e+53
GO:0097202	activation of cysteine-type endopeptidase activity	biological_process	0.31336	1	6	6525	17	24278	1.18237e+53
GO:2001056	positive regulation of cysteine-type endopeptidase activity	biological_process	0.31336	1	6	6525	17	24278	1.18229e+53
GO:1901505	carbohydrate derivative transporter activity	molecular_function	0.31346	1	12	6525	38	24278	1.18233e+107
GO:0006633	fatty acid biosynthetic process	biological_process	0.31386	1	16	6525	52	24278	1.18227e+143
GO:0005247	voltage-gated chloride channel activity	molecular_function	0.31443	1	5	6525	13	24278	1.18208e+44
GO:0005254	chloride channel activity	molecular_function	0.31443	1	5	6525	13	24278	1.18208e+44
GO:0008308	voltage-gated anion channel activity	molecular_function	0.31443	1	5	6525	13	24278	1.18208e+44
GO:0015108	chloride transmembrane transporter activity	molecular_function	0.31443	1	5	6525	13	24278	1.18217e+44
GO:0009820	alkaloid metabolic process	biological_process	0.31478	1	1	6525	1	24278	118235328
GO:0050364	tryptophan dimethylallyltransferase activity	molecular_function	0.31478	1	1	6525	1	24278	118235328
GO:0046813	receptor-mediated virion attachment to host cell	biological_process	0.31555	1	6	6525	17	24278	1.18207e+53
GO:0007010	cytoskeleton organization	biological_process	0.3165	1	262	6525	919	24278	118216804,118216683,118225725,118227214,118225361,118206516,118235843,118207764,118209930,118226276,118221154,118216977,118215237,118218679,118207056,118217760,118232933,118223991,118235860,118223628,118211653,118211066,118206579,118225887,118219161,118217014,118233445,118209851,118216564,118219799,118228952,118213103,118222250,118207210,118214440,118234268,118212218,118234304,118217019,118206304…
GO:0030243	cellulose metabolic process	biological_process	0.31686	1	4	6525	11	24278	1.18237e+35
GO:0042537	benzene-containing compound metabolic process	biological_process	0.31707	1	4	6525	11	24278	1.18235e+35
GO:0016695	oxidoreductase activity, acting on hydrogen as donor	molecular_function	0.31709	1	2	6525	4	24278	1.18229e+17
GO:0009581	detection of external stimulus	biological_process	0.3174	1	3	6525	7	24278	1.18228e+26
GO:0009582	detection of abiotic stimulus	biological_process	0.3174	1	3	6525	7	24278	1.18229e+26
GO:0009583	detection of light stimulus	biological_process	0.3174	1	3	6525	7	24278	1.18229e+26
GO:0016855	racemase and epimerase activity, acting on amino acids and derivatives	molecular_function	0.31825	1	3	6525	7	24278	1.18222e+26
GO:0036361	racemase activity, acting on amino acids and derivatives	molecular_function	0.31825	1	3	6525	7	24278	1.18215e+26
GO:0009236	cobalamin biosynthetic process	biological_process	0.3184	1	13	6525	41	24278	118213014,118214698,XLOC_168682,118215706,118237072,118208504,118235804,118232106,118217261,118219761,118226421,118223959,118217995
GO:0003877	ATP adenylyltransferase activity	molecular_function	0.31907	1	2	6525	4	24278	1.18212e+17
GO:0042440	pigment metabolic process	biological_process	0.31926	1	29	6525	97	24278	118229407,118225983,118213071,118223032,118235440,118225185,118230427,118208956,118225420,118209823,118221380,118237154,118208295,118232883,118209514,118209194,118231315,118208628,118210027,118231418,118207005,118213061,118228296,118228043,118214939,118217667,118222637,118209143,118208955
GO:0047355	CDP-glycerol glycerophosphotransferase activity	molecular_function	0.31927	1	2	6525	4	24278	1.18227e+17
GO:0006952	defense response	biological_process	0.3193	1	125	6525	439	24278	118231609,118233042,118207452,118210697,118206610,118227925,118233767,118223499,118215957,118210045,118216637,118226414,118224279,118227228,118220534,118207955,118215521,118210970,118213805,118216682,118235505,118230093,118210556,118220782,118233201,118234358,118211168,118214031,118231076,118218017,118211995,118230275,118209706,118220356,118206716,118216850,118224956,118221407,118207040,118230613…
GO:0005283	sodium:amino acid symporter activity	molecular_function	0.31969	1	2	6525	4	24278	1.18217e+17
GO:0005416	cation:amino acid symporter activity	molecular_function	0.31969	1	2	6525	4	24278	1.18217e+17
GO:0030054	cell junction	cellular_component	0.31977	1	14	6525	43	24278	1.18213e+125
GO:0005319	lipid transporter activity	molecular_function	0.32203	1	16	6525	50	24278	1.18234e+143
GO:0042221	response to chemical	biological_process	0.32238	1	107	6525	374	24278	118215837,118229808,118223690,118225636,118206982,118218322,118208295,118208248,XLOC_265637,118235935,118235489,118231565,118233245,118236367,118232291,118207460,118206984,118228219,118230541,118236021,118220240,118208312,118211251,118218257,118235217,118225501,118207950,118221611,118229090,118223137,118218514,118234410,118222281,118229431,118235449,118232571,118228092,118232096,118226021,1182328…
GO:0004252	serine-type endopeptidase activity	molecular_function	0.32316	1	85	6525	304	24278	118217750,118216728,118229751,118225732,118229121,118208375,118222207,118221920,118235964,118219716,118230005,118219856,118208335,118224618,118222523,118208184,118208038,118219385,118216467,118218824,118221750,118217723,118216198,118218095,118214123,118233113,118219202,118210127,118221223,118237424,118226600,118237224,118216735,XLOC_090711,118210645,118214011,118216071,118209327,118230348,1182216…
GO:0003796	lysozyme activity	molecular_function	0.32346	1	2	6525	4	24278	1.18229e+17
GO:0033925	mannosyl-glycoprotein endo-beta-N-acetylglucosaminidase activity	molecular_function	0.32391	1	2	6525	4	24278	1.18231e+17
GO:0009653	anatomical structure morphogenesis	biological_process	0.32407	1	76	6525	261	24278	118212273,118226946,118210880,118211130,118221234,118207532,118216182,118210279,118211159,118223835,118216736,118226619,118219650,118236206,118210009,118218362,118222349,118235067,118235937,118208703,118221733,118219906,118232990,118211160,118235585,118233397,118235250,118231094,118208201,118221185,118230591,118212222,118209159,118224517,118222691,118212439,118208566,118234255,118207402,118216735…
GO:0031122	cytoplasmic microtubule organization	biological_process	0.32451	1	2	6525	4	24278	1.18209e+17
GO:0035058	nonmotile primary cilium assembly	biological_process	0.32451	1	2	6525	4	24278	1.18209e+17
GO:0097546	ciliary base	cellular_component	0.32451	1	2	6525	4	24278	1.18236e+17
GO:0005343	organic acid:sodium symporter activity	molecular_function	0.32463	1	8	6525	24	24278	1.18229e+71
GO:0015296	anion:cation symporter activity	molecular_function	0.32463	1	8	6525	24	24278	1.18226e+71
GO:0005665	DNA-directed RNA polymerase II, core complex	cellular_component	0.32505	1	4	6525	10	24278	1.18216e+35
GO:0004620	phospholipase activity	molecular_function	0.32925	1	15	6525	45	24278	1.18208e+134
GO:0006817	phosphate ion transport	biological_process	0.32936	1	10	6525	31	24278	1.18227e+89
GO:0006004	fucose metabolic process	biological_process	0.33018	1	2	6525	4	24278	1.18238e+17
GO:0008736	L-fucose isomerase activity	molecular_function	0.33018	1	2	6525	4	24278	1.18238e+17
GO:0003964	RNA-directed DNA polymerase activity	molecular_function	0.33061	1	4	6525	11	24278	1.18213e+35
GO:0008942	nitrite reductase [NAD(P)H] activity	molecular_function	0.33096	1	3	6525	8	24278	1.18207e+26
GO:0046857	oxidoreductase activity, acting on other nitrogenous compounds as donors, with NAD or NADP as acceptor	molecular_function	0.33096	1	3	6525	8	24278	1.18207e+26
GO:0044413	avoidance of host defenses	biological_process	0.33176	1	11	6525	35	24278	1.18214e+98
GO:0044415	evasion or tolerance of host defenses	biological_process	0.33176	1	11	6525	35	24278	1.18213e+98
GO:0051832	avoidance of defenses of other organism involved in symbiotic interaction	biological_process	0.33176	1	11	6525	35	24278	1.18213e+98
GO:0051834	evasion or tolerance of defenses of other organism involved in symbiotic interaction	biological_process	0.33176	1	11	6525	35	24278	1.18232e+98
GO:0052173	response to defenses of other organism involved in symbiotic interaction	biological_process	0.33176	1	11	6525	35	24278	1.18214e+98
GO:0052200	response to host defenses	biological_process	0.33176	1	11	6525	35	24278	1.18213e+98
GO:0075136	response to host	biological_process	0.33176	1	11	6525	35	24278	1.18213e+98
GO:0019072	viral genome packaging	biological_process	0.33187	1	7	6525	20	24278	1.18215e+62
GO:0004415	hyalurononglucosaminidase activity	molecular_function	0.33192	1	5	6525	14	24278	1.18231e+44
GO:0015929	hexosaminidase activity	molecular_function	0.33192	1	5	6525	14	24278	1.18208e+44
GO:0006351	transcription, DNA-templated	biological_process	0.33343	1	891	6525	3226	24278	118219938,118235204,118222200,118220130,118227537,118225413,118214588,118234562,118211788,118235703,118236755,118219675,118219755,118216405,118226696,118231595,118224630,118222524,118216216,118225066,118230337,118212599,118222680,118211906,118231133,118232162,118234093,118208831,118230442,118214820,118231028,118215466,118208170,118212354,118209296,118224870,118229346,118216229,118209300,118225992…
GO:0097659	nucleic acid-templated transcription	biological_process	0.33343	1	891	6525	3226	24278	118226494,118207344,118233312,118215527,118207466,118226887,118222804,118227763,118234427,118220775,118224535,118206817,118215425,118222550,118233371,118219664,118218895,118227329,118232384,118210737,118208248,118225277,118208038,118218299,118218428,XLOC_035840,118208958,118221568,118237162,118236491,118229931,118214027,118222134,118212987,118235833,118213863,118206392,118219721,118228761,1182334…
GO:0090527	actin filament reorganization	biological_process	0.33571	1	1	6525	1	24278	118220849
GO:0016137	glycoside metabolic process	biological_process	0.33685	1	1	6525	1	24278	118210970
GO:0016138	glycoside biosynthetic process	biological_process	0.33685	1	1	6525	1	24278	118210970
GO:0050504	mannosyl-3-phosphoglycerate synthase activity	molecular_function	0.33685	1	1	6525	1	24278	118210970
GO:0051478	mannosylglycerate metabolic process	biological_process	0.33685	1	1	6525	1	24278	118210970
GO:0051479	mannosylglycerate biosynthetic process	biological_process	0.33685	1	1	6525	1	24278	118210970
GO:0007219	Notch signaling pathway	biological_process	0.33704	1	13	6525	40	24278	1.1823e+116
GO:0019843	rRNA binding	molecular_function	0.33775	1	6	6525	19	24278	1.18226e+53
GO:0043158	heterocyst differentiation	biological_process	0.338	1	1	6525	1	24278	118212222
GO:0008287	protein serine/threonine phosphatase complex	cellular_component	0.33851	1	6	6525	18	24278	1.18211e+53
GO:1903293	phosphatase complex	cellular_component	0.33851	1	6	6525	18	24278	1.18234e+53
GO:0009522	photosystem I	cellular_component	0.33934	1	7	6525	21	24278	1.1821e+62
GO:0015926	glucosidase activity	molecular_function	0.33944	1	5	6525	14	24278	1.18226e+44
GO:0000165	MAPK cascade	biological_process	0.3395	1	5	6525	15	24278	1.18214e+44
GO:0023014	signal transduction by protein phosphorylation	biological_process	0.3395	1	5	6525	15	24278	1.18234e+44
GO:0043408	regulation of MAPK cascade	biological_process	0.3395	1	5	6525	15	24278	1.18234e+44
GO:0043410	positive regulation of MAPK cascade	biological_process	0.3395	1	5	6525	15	24278	1.18212e+44
GO:0030254	protein secretion by the type III secretion system	biological_process	0.34074	1	2	6525	4	24278	1.18217e+17
GO:0030257	type III protein secretion system complex	cellular_component	0.34074	1	2	6525	4	24278	1.18221e+17
GO:0010827	regulation of glucose transport	biological_process	0.34094	1	5	6525	13	24278	1.18213e+44
GO:0010829	negative regulation of glucose transport	biological_process	0.34094	1	5	6525	13	24278	1.18231e+44
GO:0015758	glucose transport	biological_process	0.34094	1	5	6525	13	24278	1.18231e+44
GO:0046323	glucose import	biological_process	0.34094	1	5	6525	13	24278	1.18236e+44
GO:0046324	regulation of glucose import	biological_process	0.34094	1	5	6525	13	24278	1.18231e+44
GO:0046325	negative regulation of glucose import	biological_process	0.34094	1	5	6525	13	24278	1.18217e+44
GO:0045158	electron transporter, transferring electrons within cytochrome b6/f complex of photosystem II activity	molecular_function	0.34147	1	5	6525	14	24278	1.18207e+44
GO:0050840	extracellular matrix binding	molecular_function	0.34162	1	8	6525	24	24278	1.18236e+71
GO:0008897	holo-[acyl-carrier-protein] synthase activity	molecular_function	0.342	1	2	6525	4	24278	1.18227e+17
GO:0008998	ribonucleoside-triphosphate reductase activity	molecular_function	0.3425	1	2	6525	4	24278	1.18222e+17
GO:0097196	Shu complex	cellular_component	0.34466	1	2	6525	4	24278	1.18225e+17
GO:1990391	DNA repair complex	cellular_component	0.34466	1	2	6525	4	24278	1.18225e+17
GO:0015850	organic hydroxy compound transport	biological_process	0.34491	1	4	6525	11	24278	1.18206e+35
GO:0032774	RNA biosynthetic process	biological_process	0.34607	1	899	6525	3257	24278	118227330,118211609,118216463,118234757,118207213,118229565,118222763,118237305,118218766,118231797,118212714,118221329,118233870,118209690,118211042,118209968,118221540,118213833,118211329,118206509,118221574,118211284,118210336,118235272,118232358,118237380,118217860,118234264,118208236,118223980,118225719,118219764,118208627,118227557,118222148,118213446,118224783,118218921,118222650,118214407…
GO:0000159	protein phosphatase type 2A complex	cellular_component	0.34648	1	4	6525	11	24278	1.18237e+35
GO:0008601	protein phosphatase type 2A regulator activity	molecular_function	0.34648	1	4	6525	11	24278	1.18237e+35
GO:0046649	lymphocyte activation	biological_process	0.34688	1	3	6525	8	24278	1.18231e+26
GO:0008792	arginine decarboxylase activity	molecular_function	0.34787	1	1	6525	1	24278	118217910
GO:0048519	negative regulation of biological process	biological_process	0.34852	1	105	6525	370	24278	118212222,118227991,118224517,118209141,118218270,118235285,118210639,118233957,118208675,118229054,118216434,118231807,118232414,118226748,118214094,118222525,118212857,118215181,118210696,118209961,118220362,118227066,118212976,118232195,118213808,118218438,118215240,118212235,118215515,118233413,118227228,118234757,118206454,118213650,118209641,118236733,118212995,118209043,118217143,118214520…
GO:0000030	mannosyltransferase activity	molecular_function	0.34859	1	5	6525	14	24278	1.18211e+44
GO:0009617	response to bacterium	biological_process	0.35015	1	33	6525	108	24278	118227925,118210697,118233767,118228040,118210045,118224279,118210970,118215521,118207955,118211026,118220868,118235505,118220782,118216682,118218425,118214031,118211168,118225067,118221407,118233377,118211649,118234257,118222691,118210280,118213673,118220805,118212194,118217201,118221416,118213854,118233210,118223579,118210784
GO:0042742	defense response to bacterium	biological_process	0.35015	1	33	6525	108	24278	118224279,118210045,118210697,118227925,118233767,118228040,118225067,118218425,118214031,118211168,118235505,118220782,118216682,118210970,118215521,118207955,118211026,118220868,118222691,118210280,118213673,118233377,118211649,118234257,118221407,118233210,118223579,118210784,118217201,118220805,118221416,118212194,118213854
GO:0009318	exodeoxyribonuclease VII complex	cellular_component	0.35163	1	4	6525	11	24278	1.18235e+35
GO:0008527	taste receptor activity	molecular_function	0.35238	1	2	6525	4	24278	1.18226e+17
GO:0009593	detection of chemical stimulus	biological_process	0.35238	1	2	6525	4	24278	1.18233e+17
GO:0050906	detection of stimulus involved in sensory perception	biological_process	0.35238	1	2	6525	4	24278	1.18226e+17
GO:0050907	detection of chemical stimulus involved in sensory perception	biological_process	0.35238	1	2	6525	4	24278	1.18226e+17
GO:0050912	detection of chemical stimulus involved in sensory perception of taste	biological_process	0.35238	1	2	6525	4	24278	1.18226e+17
GO:0033179	proton-transporting V-type ATPase, V0 domain	cellular_component	0.35462	1	25	6525	84	24278	1.18234e+224
GO:0015204	urea transmembrane transporter activity	molecular_function	0.35469	1	4	6525	11	24278	1.1822e+35
GO:0015840	urea transport	biological_process	0.35469	1	4	6525	11	24278	1.18232e+35
GO:0019755	one-carbon compound transport	biological_process	0.35469	1	4	6525	11	24278	1.18232e+35
GO:0071918	urea transmembrane transport	biological_process	0.35469	1	4	6525	11	24278	1.18232e+35
GO:0000795	synaptonemal complex	cellular_component	0.35658	1	3	6525	8	24278	1.18207e+26
GO:0008704	5-carboxymethyl-2-hydroxymuconate delta-isomerase activity	molecular_function	0.35758	1	1	6525	1	24278	118227401
GO:0032940	secretion by cell	biological_process	0.35811	1	38	6525	129	24278	118212966,118213172,118212804,118235390,XLOC_086918,118209975,118211612,118220808,118219179,118218347,118224234,118220689,118209436,118207373,118236639,118213593,118232936,118226601,118234735,118214908,118217064,118213624,118221159,118211258,118217050,118215963,118208319,118221933,118226764,118237477,118220782,118210361,118220608,118225468,118229784,118214131,118213818,118211203
GO:0016226	iron-sulfur cluster assembly	biological_process	0.35892	1	9	6525	28	24278	1.18212e+80
GO:0031163	metallo-sulfur cluster assembly	biological_process	0.35892	1	9	6525	28	24278	1.1821e+80
GO:0020012	evasion or tolerance of host immune response	biological_process	0.36019	1	7	6525	21	24278	1.18212e+62
GO:0051805	evasion or tolerance of immune response of other organism involved in symbiotic interaction	biological_process	0.36019	1	7	6525	21	24278	1.18227e+62
GO:0052564	response to immune response of other organism involved in symbiotic interaction	biological_process	0.36019	1	7	6525	21	24278	1.18227e+62
GO:0052572	response to host immune response	biological_process	0.36019	1	7	6525	21	24278	1.18212e+62
GO:0008773	[protein-PII] uridylyltransferase activity	molecular_function	0.36079	1	2	6525	4	24278	1.18227e+17
GO:0042274	ribosomal small subunit biogenesis	biological_process	0.36113	1	2	6525	4	24278	1.18207e+17
GO:0030111	regulation of Wnt signaling pathway	biological_process	0.36124	1	8	6525	26	24278	1.18216e+71
GO:0071705	nitrogen compound transport	biological_process	0.36174	1	63	6525	221	24278	118220018,118236533,118217073,118215055,118229147,118232409,118225079,118221910,118222730,118226206,118215427,118228001,118215172,118236711,118214994,118232197,118234279,118214733,118211609,118224695,118215007,118223257,118219855,118217932,118226737,118222574,118216754,118231279,118226302,118213888,118219755,118217857,118223723,118215515,118209210,118227073,118229649,118218835,118233702,118209547…
GO:0009292	genetic transfer	biological_process	0.36183	1	3	6525	7	24278	1.18228e+26
GO:0030118	clathrin coat	cellular_component	0.36222	1	11	6525	33	24278	1.18213e+98
GO:0000279	M phase	biological_process	0.36222	1	11	6525	36	24278	1.18229e+98
GO:0022403	cell cycle phase	biological_process	0.36222	1	11	6525	36	24278	1.18223e+98
GO:0044848	biological phase	biological_process	0.36222	1	11	6525	36	24278	1.18206e+98
GO:0007224	smoothened signaling pathway	biological_process	0.36241	1	13	6525	41	24278	1.18232e+116
GO:0030682	evasion or tolerance of host defense response	biological_process	0.3661	1	9	6525	29	24278	1.18212e+80
GO:0051807	evasion or tolerance of defense response of other organism involved in symbiotic interaction	biological_process	0.3661	1	9	6525	29	24278	1.18216e+80
GO:0016043	cellular component organization	biological_process	0.36798	1	741	6525	2669	24278	118210647,118210080,118217400,118219179,118218490,118227931,118213172,118223011,118228457,118227287,118235825,118218299,118225129,118229820,118213306,118228840,118216851,118217786,118234374,118223276,118210893,118234819,118208364,118208177,118223961,118215164,118215517,118237288,118232384,118229035,118215527,118223544,118229294,118236611,118227763,118209995,118234363,118212406,118219755,118214480…
GO:0016670	oxidoreductase activity, acting on a sulfur group of donors, oxygen as acceptor	molecular_function	0.36881	1	10	6525	32	24278	1.18237e+89
GO:0009095	aromatic amino acid family biosynthetic process, prephenate pathway	biological_process	0.36893	1	2	6525	5	24278	1.18231e+17
GO:0048731	system development	biological_process	0.36999	1	34	6525	116	24278	118222531,118223730,118216598,118236206,118225636,118211130,118216422,118221326,118216182,118221234,118214940,118235354,118223175,118214994,118219841,118231094,118212446,118227124,118224517,118225851,118208864,118209159,118212222,118230210,118207402,118218995,118217608,118211590,118214966,118231430,118224654,118217196,118230877,118232096
GO:0051705	multi-organism behavior	biological_process	0.37018	1	11	6525	34	24278	118222231,118226824,118220424,118213371,118214531,118211930,118232297,118206297,XLOC_283220,118217558,118218115
GO:0051028	mRNA transport	biological_process	0.37097	1	18	6525	61	24278	1.18234e+161
GO:0010024	phytochromobilin biosynthetic process	biological_process	0.3743	1	2	6525	4	24278	1.18207e+17
GO:0016636	oxidoreductase activity, acting on the CH-CH group of donors, iron-sulfur protein as acceptor	molecular_function	0.3743	1	2	6525	4	24278	1.18207e+17
GO:0050897	cobalt ion binding	molecular_function	0.3743	1	2	6525	4	24278	1.18207e+17
GO:0051202	phytochromobilin metabolic process	biological_process	0.3743	1	2	6525	4	24278	1.18208e+17
GO:0000175	3'-5'-exoribonuclease activity	molecular_function	0.37435	1	10	6525	32	24278	1.18227e+89
GO:0009251	glucan catabolic process	biological_process	0.37471	1	2	6525	5	24278	1.1821e+17
GO:0030245	cellulose catabolic process	biological_process	0.37471	1	2	6525	5	24278	1.18233e+17
GO:0044247	cellular polysaccharide catabolic process	biological_process	0.37471	1	2	6525	5	24278	1.18233e+17
GO:0051275	beta-glucan catabolic process	biological_process	0.37471	1	2	6525	5	24278	1.18233e+17
GO:0042720	mitochondrial inner membrane peptidase complex	cellular_component	0.37564	1	3	6525	8	24278	1.18221e+26
GO:0031342	negative regulation of cell killing	biological_process	0.3766	1	2	6525	5	24278	1.18232e+17
GO:0001933	negative regulation of protein phosphorylation	biological_process	0.37832	1	4	6525	11	24278	1.18209e+35
GO:0004862	cAMP-dependent protein kinase inhibitor activity	molecular_function	0.37832	1	4	6525	11	24278	1.18209e+35
GO:0006469	negative regulation of protein kinase activity	biological_process	0.37832	1	4	6525	11	24278	1.18225e+35
GO:0033673	negative regulation of kinase activity	biological_process	0.37832	1	4	6525	11	24278	1.18225e+35
GO:0042326	negative regulation of phosphorylation	biological_process	0.37832	1	4	6525	11	24278	1.18225e+35
GO:0003953	NAD+ nucleosidase activity	molecular_function	0.37863	1	2	6525	5	24278	1.18226e+17
GO:0006766	vitamin metabolic process	biological_process	0.37865	1	20	6525	68	24278	118215706,XLOC_168682,118213014,118214698,118237072,118217261,118212081,118232106,118217995,118222937,118233054,118224129,118208504,118235804,118226421,118223959,118216416,118235386,118232490,118219761
GO:0006767	water-soluble vitamin metabolic process	biological_process	0.37865	1	20	6525	68	24278	118232490,118219761,118226421,118223959,118216416,118235386,118208504,118235804,118224129,118233054,118222937,118217995,118212081,118232106,118217261,118237072,118213014,118214698,XLOC_168682,118215706
GO:0034227	tRNA thio-modification	biological_process	0.37877	1	2	6525	5	24278	1.1822e+17
GO:0031386	protein tag	molecular_function	0.37922	1	4	6525	11	24278	1.18235e+35
GO:0000052	citrulline metabolic process	biological_process	0.38022	1	3	6525	8	24278	1.18227e+26
GO:0018101	protein citrullination	biological_process	0.38022	1	3	6525	8	24278	1.18211e+26
GO:0018195	peptidyl-arginine modification	biological_process	0.38022	1	3	6525	8	24278	1.18228e+26
GO:0019240	citrulline biosynthetic process	biological_process	0.38022	1	3	6525	8	24278	1.18228e+26
GO:0006112	energy reserve metabolic process	biological_process	0.38025	1	3	6525	8	24278	1.18236e+26
GO:0030119	AP-type membrane coat adaptor complex	cellular_component	0.38203	1	10	6525	31	24278	1.18227e+89
GO:0007052	mitotic spindle organization	biological_process	0.38209	1	3	6525	8	24278	1.18236e+26
GO:0007128	meiotic prophase I	biological_process	0.3826	1	2	6525	5	24278	1.18207e+17
GO:0051324	prophase	biological_process	0.3826	1	2	6525	5	24278	1.18207e+17
GO:0098762	meiotic cell cycle phase	biological_process	0.3826	1	2	6525	5	24278	1.18207e+17
GO:0098764	meiosis I cell cycle phase	biological_process	0.3826	1	2	6525	5	24278	1.18228e+17
GO:0046660	female sex differentiation	biological_process	0.38408	1	9	6525	28	24278	1.18215e+80
GO:0032182	ubiquitin-like protein binding	molecular_function	0.38446	1	17	6525	56	24278	1.18207e+152
GO:0009229	thiamine diphosphate biosynthetic process	biological_process	0.38507	1	4	6525	11	24278	1.18223e+35
GO:0042357	thiamine diphosphate metabolic process	biological_process	0.38507	1	4	6525	11	24278	1.18206e+35
GO:0016972	thiol oxidase activity	molecular_function	0.3857	1	9	6525	29	24278	1.18237e+80
GO:0008134	transcription factor binding	molecular_function	0.38588	1	72	6525	256	24278	118219787,118207489,118222134,118215078,118234295,118212572,118230887,118213172,118216933,118217042,118233853,118226544,118211941,118218466,118225561,118207313,118214637,118235869,118232993,118217258,118206759,118220131,118209322,118210583,XLOC_265637,118235779,118237477,118232878,118225705,118228301,118224491,118235794,118223905,118211690,118210449,118219041,118213722,118230337,118237072,1182112…
GO:0034220	ion transmembrane transport	biological_process	0.38623	1	128	6525	454	24278	118210636,118235894,118232197,118234318,118223257,118215007,118225515,118218443,118234358,118219293,118224820,118211196,118224666,118229275,118209560,118234483,118235572,118221385,118232566,118231947,118229944,118217403,118215598,118207271,118215559,118231272,118216387,118226832,118211916,118207440,118225118,118206545,118209286,118233796,118231795,118224780,118231833,118209908,118226778,118225924…
GO:0030269	tetrahydromethanopterin S-methyltransferase activity	molecular_function	0.38707	1	7	6525	22	24278	1.18226e+62
GO:0042086	5-methyl-5,6,7,8-tetrahydromethanopterin-dependent methyltransferase activity	molecular_function	0.38707	1	7	6525	22	24278	1.18222e+62
GO:0015994	chlorophyll metabolic process	biological_process	0.38759	1	9	6525	28	24278	1.18209e+80
GO:0015288	porin activity	molecular_function	0.38939	1	3	6525	8	24278	1.18235e+26
GO:0022829	wide pore channel activity	molecular_function	0.38939	1	3	6525	8	24278	1.18235e+26
GO:0006897	endocytosis	biological_process	0.38943	1	26	6525	92	24278	118216564,118219217,118221152,118217625,118211203,118228952,118227079,118229527,118220418,118221156,118225998,118228880,118228882,118217884,118228889,118220419,118229992,118209975,118228956,118220808,118214651,118214440,118216818,118225489,118221154,118217050
GO:0005173	stem cell factor receptor binding	molecular_function	0.38988	1	3	6525	8	24278	1.1821e+26
GO:0050776	regulation of immune response	biological_process	0.39012	1	11	6525	37	24278	1.18223e+98
GO:0000280	nuclear division	biological_process	0.39037	1	42	6525	150	24278	118213014,118225234,118229265,118236446,118235328,118216851,118207956,118213756,118212857,118217693,118225128,118217959,118231681,118217219,118226760,118207721,118223723,118227931,118215775,118209329,118206350,118224805,118233172,118220608,118208585,118206931,118222786,118225058,118229242,118222785,118226103,118233125,118211930,118214066,XLOC_265637,118206726,118223840,118211564,118216505,1182128…
GO:0022890	inorganic cation transmembrane transporter activity	molecular_function	0.39121	1	330	6525	1200	24278	118237470,118213440,118230536,118216856,118212979,118222763,118219855,118234757,118214371,118224860,118217316,118224212,118234636,118231671,118213833,118209634,118218827,118207195,118222891,118211646,118206425,118208964,118210964,118215209,118225084,118237140,118219709,118232936,118229818,118220765,118232274,118232781,118221569,118236326,118236502,118222218,118232990,118228254,118212201,118228062…
GO:0010033	response to organic substance	biological_process	0.39208	1	41	6525	143	24278	118213135,118215837,118228462,118229808,118214820,118218322,118206982,118208248,118206509,118215658,118207460,118206929,118206984,118228219,118229879,118230409,118231565,118233245,118225501,118208306,118220240,118236021,118227365,118211251,118208312,118218257,118215146,118234410,118229090,118211928,118212746,118229431,118235449,118214757,118235572,118231156,118210338,118229931,118227071,118209622…
GO:0000725	recombinational repair	biological_process	0.39232	1	4	6525	11	24278	1.18225e+35
GO:0016558	protein import into peroxisome matrix	biological_process	0.39368	1	2	6525	5	24278	1.18213e+17
GO:0016560	protein import into peroxisome matrix, docking	biological_process	0.39368	1	2	6525	5	24278	1.18233e+17
GO:0022615	protein to membrane docking	biological_process	0.39368	1	2	6525	5	24278	1.18213e+17
GO:0003688	DNA replication origin binding	molecular_function	0.39405	1	5	6525	14	24278	1.1823e+44
GO:0006284	base-excision repair	biological_process	0.3948	1	4	6525	12	24278	1.18218e+35
GO:0008158	hedgehog receptor activity	molecular_function	0.39613	1	9	6525	28	24278	1.18207e+80
GO:0018958	phenol-containing compound metabolic process	biological_process	0.39676	1	4	6525	12	24278	1.18209e+35
GO:0015718	monocarboxylic acid transport	biological_process	0.39778	1	8	6525	25	24278	1.18227e+71
GO:0006954	inflammatory response	biological_process	0.39947	1	7	6525	23	24278	1.18224e+62
GO:0009317	acetyl-CoA carboxylase complex	cellular_component	0.40084	1	2	6525	5	24278	1.18221e+17
GO:0000160	phosphorelay signal transduction system	biological_process	0.40203	1	15	6525	49	24278	1.18224e+134
GO:0071826	ribonucleoprotein complex subunit organization	biological_process	0.40285	1	10	6525	32	24278	1.18229e+89
GO:0046903	secretion	biological_process	0.4029	1	38	6525	131	24278	118212966,118213172,118235390,118212804,118211612,118219179,118220808,XLOC_086918,118209975,118218347,118224234,118209436,118207373,118220689,118232936,118236639,118213593,118234735,118226601,118214908,118217064,118217050,118215963,118213624,118211258,118221159,118208319,118226764,118237477,118220782,118221933,118225468,118220608,118210361,118229784,118214131,118211203,118213818
GO:0030493	bacteriochlorophyll metabolic process	biological_process	0.40335	1	4	6525	11	24278	1.18226e+35
GO:0030494	bacteriochlorophyll biosynthetic process	biological_process	0.40335	1	4	6525	11	24278	1.18233e+35
GO:0006063	uronic acid metabolic process	biological_process	0.40439	1	2	6525	5	24278	1.18214e+17
GO:0006064	glucuronate catabolic process	biological_process	0.40439	1	2	6525	5	24278	1.18214e+17
GO:0019585	glucuronate metabolic process	biological_process	0.40439	1	2	6525	5	24278	1.1821e+17
GO:0031854	orexigenic neuropeptide QRFP receptor binding	molecular_function	0.40662	1	2	6525	5	24278	1.18226e+17
GO:0051119	sugar transmembrane transporter activity	molecular_function	0.41051	1	4	6525	12	24278	1.18226e+35
GO:0004197	cysteine-type endopeptidase activity	molecular_function	0.41174	1	62	6525	220	24278	118216125,118217304,118209329,118230016,118237179,118221155,118233653,118207689,118216071,118226257,118233652,118220574,118221773,118209637,118218739,118212312,118220341,118227951,118210415,118220959,118234341,118209070,118237524,118219277,118210645,118223333,118206488,118216797,118223223,118222940,118233660,118223762,118230708,118222523,118221156,118221866,118226824,118235905,118232307,118233658…
GO:0032102	negative regulation of response to external stimulus	biological_process	0.41248	1	9	6525	30	24278	1.18212e+80
GO:0075733	intracellular transport of virus	biological_process	0.4137	1	3	6525	8	24278	1.18226e+26
GO:1902583	multi-organism intracellular transport	biological_process	0.4137	1	3	6525	8	24278	1.18235e+26
GO:0019075	virus maturation	biological_process	0.41411	1	1	6525	2	24278	118223961
GO:0046797	viral procapsid maturation	biological_process	0.41411	1	1	6525	2	24278	118223961
GO:0004506	squalene monooxygenase activity	molecular_function	0.41435	1	3	6525	8	24278	1.18214e+26
GO:0004532	exoribonuclease activity	molecular_function	0.41492	1	10	6525	33	24278	1.18221e+89
GO:0016896	exoribonuclease activity, producing 5'-phosphomonoesters	molecular_function	0.41492	1	10	6525	33	24278	1.18232e+89
GO:0032270	positive regulation of cellular protein metabolic process	biological_process	0.41686	1	14	6525	48	24278	1.18234e+125
GO:0051247	positive regulation of protein metabolic process	biological_process	0.41686	1	14	6525	48	24278	1.18228e+125
GO:0006032	chitin catabolic process	biological_process	0.41705	1	5	6525	15	24278	1.18222e+44
GO:0046348	amino sugar catabolic process	biological_process	0.41705	1	5	6525	15	24278	1.18212e+44
GO:1901072	glucosamine-containing compound catabolic process	biological_process	0.41705	1	5	6525	15	24278	1.18221e+44
GO:0019902	phosphatase binding	molecular_function	0.4185	1	2	6525	5	24278	1.18213e+17
GO:0009539	photosystem II reaction center	cellular_component	0.41875	1	20	6525	67	24278	1.18221e+179
GO:0009719	response to endogenous stimulus	biological_process	0.41933	1	37	6525	130	24278	118234410,118215146,118229090,118211928,118235449,118229431,118210338,118231156,118235572,118229931,118216433,118209622,118227071,118213135,118229808,118228462,118215837,118214820,118206509,118208248,118218322,118206982,118230409,118228219,118206984,118206929,118207460,118215658,118233245,118231565,118225501,118218257,118208312,118211251,118220240,118208306,118227365
GO:0001816	cytokine production	biological_process	0.4203	1	10	6525	32	24278	1.18222e+89
GO:0001817	regulation of cytokine production	biological_process	0.4203	1	10	6525	32	24278	1.18229e+89
GO:0001819	positive regulation of cytokine production	biological_process	0.4203	1	10	6525	32	24278	1.18223e+89
GO:0003941	L-serine ammonia-lyase activity	molecular_function	0.42034	1	1	6525	2	24278	118228125
GO:0030430	host cell cytoplasm	cellular_component	0.42048	1	9	6525	29	24278	1.18226e+80
GO:0003810	protein-glutamine gamma-glutamyltransferase activity	molecular_function	0.4209	1	9	6525	29	24278	1.18214e+80
GO:0009110	vitamin biosynthetic process	biological_process	0.42117	1	19	6525	66	24278	118237072,118215706,XLOC_168682,118213014,118214698,118217995,118222937,118217261,118212081,118232106,118208504,118235804,118233054,118224129,118226421,118223959,118235386,118232490,118219761
GO:0042364	water-soluble vitamin biosynthetic process	biological_process	0.42117	1	19	6525	66	24278	118217995,118222937,118217261,118212081,118232106,118237072,118215706,XLOC_168682,118213014,118214698,118223959,118226421,118235386,118232490,118219761,118208504,118235804,118233054,118224129
GO:0060478	acrosomal vesicle exocytosis	biological_process	0.42255	1	4	6525	11	24278	1.18211e+35
GO:0019888	protein phosphatase regulator activity	molecular_function	0.42256	1	7	6525	22	24278	1.18224e+62
GO:0047661	amino-acid racemase activity	molecular_function	0.42309	1	2	6525	5	24278	1.18215e+17
GO:0006568	tryptophan metabolic process	biological_process	0.42386	1	4	6525	12	24278	1.18232e+35
GO:0006586	indolalkylamine metabolic process	biological_process	0.42386	1	4	6525	12	24278	1.18232e+35
GO:0042430	indole-containing compound metabolic process	biological_process	0.42386	1	4	6525	12	24278	1.18232e+35
GO:0007131	reciprocal meiotic recombination	biological_process	0.42398	1	6	6525	20	24278	1.18209e+53
GO:0035825	reciprocal DNA recombination	biological_process	0.42398	1	6	6525	20	24278	1.18221e+53
GO:0016860	intramolecular oxidoreductase activity	molecular_function	0.42398	1	13	6525	44	24278	1.18208e+116
GO:0044275	cellular carbohydrate catabolic process	biological_process	0.42573	1	3	6525	9	24278	1.18233e+26
GO:0031965	nuclear membrane	cellular_component	0.42585	1	6	6525	20	24278	1.18211e+53
GO:0007283	spermatogenesis	biological_process	0.42752	1	19	6525	65	24278	1.1822e+170
GO:0048232	male gamete generation	biological_process	0.42752	1	19	6525	65	24278	1.18231e+170
GO:0070469	respiratory chain	cellular_component	0.42754	1	15	6525	53	24278	1.18224e+134
GO:0004113	2',3'-cyclic-nucleotide 3'-phosphodiesterase activity	molecular_function	0.42851	1	2	6525	5	24278	1.18236e+17
GO:0009214	cyclic nucleotide catabolic process	biological_process	0.42851	1	2	6525	5	24278	1.1823e+17
GO:0010927	cellular component assembly involved in morphogenesis	biological_process	0.42942	1	4	6525	12	24278	1.18236e+35
GO:0042384	cilium assembly	biological_process	0.42942	1	4	6525	12	24278	1.18236e+35
GO:0060271	cilium morphogenesis	biological_process	0.42942	1	4	6525	12	24278	1.18236e+35
GO:0050661	NADP binding	molecular_function	0.43019	1	13	6525	45	24278	1.18207e+116
GO:0045444	fat cell differentiation	biological_process	0.43137	1	10	6525	34	24278	1.18237e+89
GO:0005801	cis-Golgi network	cellular_component	0.43179	1	13	6525	45	24278	1.18219e+116
GO:0010562	positive regulation of phosphorus metabolic process	biological_process	0.43333	1	7	6525	24	24278	1.18234e+62
GO:0031401	positive regulation of protein modification process	biological_process	0.43333	1	7	6525	24	24278	1.18211e+62
GO:0045937	positive regulation of phosphate metabolic process	biological_process	0.43333	1	7	6525	24	24278	1.18234e+62
GO:0005136	interleukin-4 receptor binding	molecular_function	0.43351	1	2	6525	5	24278	1.18221e+17
GO:1901700	response to oxygen-containing compound	biological_process	0.43352	1	17	6525	57	24278	1.18232e+152
GO:0001669	acrosomal vesicle	cellular_component	0.43394	1	2	6525	5	24278	1.18221e+17
GO:0005388	calcium-transporting ATPase activity	molecular_function	0.43402	1	3	6525	8	24278	1.18219e+26
GO:0004318	enoyl-[acyl-carrier-protein] reductase (NADH) activity	molecular_function	0.43513	1	1	6525	2	24278	118210724
GO:0007342	fusion of sperm to egg plasma membrane	biological_process	0.43517	1	6	6525	18	24278	1.18221e+53
GO:0045026	plasma membrane fusion	biological_process	0.43517	1	6	6525	18	24278	1.18221e+53
GO:0006569	tryptophan catabolic process	biological_process	0.43601	1	3	6525	9	24278	1.18232e+26
GO:0009310	amine catabolic process	biological_process	0.43601	1	3	6525	9	24278	1.18232e+26
GO:0019441	tryptophan catabolic process to kynurenine	biological_process	0.43601	1	3	6525	9	24278	1.18219e+26
GO:0042402	cellular biogenic amine catabolic process	biological_process	0.43601	1	3	6525	9	24278	1.18219e+26
GO:0042436	indole-containing compound catabolic process	biological_process	0.43601	1	3	6525	9	24278	1.18232e+26
GO:0046218	indolalkylamine catabolic process	biological_process	0.43601	1	3	6525	9	24278	1.18219e+26
GO:0070189	kynurenine metabolic process	biological_process	0.43601	1	3	6525	9	24278	1.18235e+26
GO:0051336	regulation of hydrolase activity	biological_process	0.43604	1	22	6525	74	24278	1.1823e+197
GO:0010833	telomere maintenance via telomere lengthening	biological_process	0.43642	1	1	6525	2	24278	118214480
GO:0005310	dicarboxylic acid transmembrane transporter activity	molecular_function	0.43646	1	9	6525	30	24278	1.18216e+80
GO:0000790	nuclear chromatin	cellular_component	0.43696	1	1	6525	2	24278	118223941
GO:0031011	Ino80 complex	cellular_component	0.43696	1	1	6525	2	24278	118223941
GO:0097346	INO80-type complex	cellular_component	0.43696	1	1	6525	2	24278	118223941
GO:0034655	nucleobase-containing compound catabolic process	biological_process	0.43709	1	25	6525	87	24278	1.18232e+224
GO:0006805	xenobiotic metabolic process	biological_process	0.43881	1	1	6525	2	24278	118230376
GO:0009410	response to xenobiotic stimulus	biological_process	0.43881	1	1	6525	2	24278	118230376
GO:0010124	phenylacetate catabolic process	biological_process	0.43881	1	1	6525	2	24278	118230376
GO:0042178	xenobiotic catabolic process	biological_process	0.43881	1	1	6525	2	24278	118230376
GO:0071466	cellular response to xenobiotic stimulus	biological_process	0.43881	1	1	6525	2	24278	118230376
GO:0051338	regulation of transferase activity	biological_process	0.43951	1	17	6525	60	24278	118222738,118234827,118233957,118212348,118214094,118210147,118207956,118234305,118209043,118224997,118217140,118212857,118225128,118211930,118214066,XLOC_265637,118228092
GO:0032403	protein complex binding	molecular_function	0.43974	1	104	6525	376	24278	118215298,118208504,118210491,118218679,118206358,118210868,118217214,118226266,118225285,118229594,118221492,118225406,118225839,118216804,118236446,118233743,118229265,118228841,118210613,118215393,118213181,118209279,118236333,118223545,118234871,118235804,118216538,118225567,118219486,118224275,118226025,118218065,118216422,118232940,118207689,118211129,118230534,118219645,118221665,118214269…
GO:0043085	positive regulation of catalytic activity	biological_process	0.43992	1	13	6525	45	24278	1.18237e+116
GO:0051274	beta-glucan biosynthetic process	biological_process	0.44009	1	3	6525	9	24278	1.18236e+26
GO:0034618	arginine binding	molecular_function	0.44048	1	2	6525	5	24278	1.18207e+17
GO:0048285	organelle fission	biological_process	0.44098	1	44	6525	160	24278	118224805,118206350,118215775,118209329,118224860,118220608,118233172,118206931,118208585,118225058,118229242,118222786,118226103,118222785,XLOC_265637,118214066,118211930,118233125,118216505,118211564,118223840,118206726,118231316,118234329,118212869,118236446,118229265,118225234,118213014,118235328,118231014,118207956,118216851,118212857,118213756,118217219,118225128,118231681,118217959,1182176…
GO:0043066	negative regulation of apoptotic process	biological_process	0.44123	1	10	6525	34	24278	1.18216e+89
GO:0043069	negative regulation of programmed cell death	biological_process	0.44123	1	10	6525	34	24278	1.18212e+89
GO:0060548	negative regulation of cell death	biological_process	0.44123	1	10	6525	34	24278	1.18215e+89
GO:0007160	cell-matrix adhesion	biological_process	0.44233	1	4	6525	12	24278	1.18236e+35
GO:0009664	plant-type cell wall organization	biological_process	0.44312	1	3	6525	8	24278	1.18211e+26
GO:0071669	plant-type cell wall organization or biogenesis	biological_process	0.44312	1	3	6525	8	24278	1.18235e+26
GO:0008880	glucuronate isomerase activity	molecular_function	0.44343	1	1	6525	2	24278	118210270
GO:0010629	negative regulation of gene expression	biological_process	0.44362	1	34	6525	118	24278	118222525,118215181,118207242,118213808,118227991,118210155,118209141,118218270,118235285,118210639,118219128,118229054,118231807,118226748,118229106,118232599,118209440,118218675,118207269,118211823,118210970,118234757,118213650,118210154,118209641,118218788,118212995,118236733,118235521,118210624,118222349,118217178,118215069,118209794
GO:0034464	BBSome	cellular_component	0.44428	1	3	6525	9	24278	1.18222e+26
GO:0008373	sialyltransferase activity	molecular_function	0.44523	1	10	6525	34	24278	1.18215e+89
GO:0008519	ammonium transmembrane transporter activity	molecular_function	0.44641	1	5	6525	16	24278	1.18219e+44
GO:0004853	uroporphyrinogen decarboxylase activity	molecular_function	0.44653	1	1	6525	2	24278	118234419
GO:0004784	superoxide dismutase activity	molecular_function	0.44737	1	4	6525	12	24278	1.18235e+35
GO:0016721	oxidoreductase activity, acting on superoxide radicals as acceptor	molecular_function	0.44737	1	4	6525	12	24278	1.18212e+35
GO:0006308	DNA catabolic process	biological_process	0.4476	1	5	6525	16	24278	1.18229e+44
GO:0045300	acyl-[acyl-carrier-protein] desaturase activity	molecular_function	0.44811	1	1	6525	2	24278	118223626
GO:0004826	phenylalanine-tRNA ligase activity	molecular_function	0.4484	1	3	6525	9	24278	1.18209e+26
GO:0012507	ER to Golgi transport vesicle membrane	cellular_component	0.44886	1	15	6525	51	24278	1.18227e+134
GO:0030127	COPII vesicle coat	cellular_component	0.44886	1	15	6525	51	24278	1.18208e+134
GO:0030134	ER to Golgi transport vesicle	cellular_component	0.44886	1	15	6525	51	24278	1.18227e+134
GO:0051049	regulation of transport	biological_process	0.45053	1	14	6525	47	24278	1.18211e+125
GO:0009254	peptidoglycan turnover	biological_process	0.45077	1	1	6525	2	24278	118228415
GO:0003697	single-stranded DNA binding	molecular_function	0.45124	1	7	6525	24	24278	1.18215e+62
GO:0020002	host cell plasma membrane	cellular_component	0.45152	1	1	6525	2	24278	118213843
GO:0044156	host cell junction	cellular_component	0.45152	1	1	6525	2	24278	118213843
GO:0005086	ARF guanyl-nucleotide exchange factor activity	molecular_function	0.45198	1	9	6525	28	24278	1.18209e+80
GO:0032011	ARF protein signal transduction	biological_process	0.45198	1	9	6525	28	24278	1.18209e+80
GO:0032012	regulation of ARF protein signal transduction	biological_process	0.45198	1	9	6525	28	24278	1.18213e+80
GO:0031304	intrinsic component of mitochondrial inner membrane	cellular_component	0.45315	1	5	6525	15	24278	1.18215e+44
GO:0031305	integral component of mitochondrial inner membrane	cellular_component	0.45315	1	5	6525	15	24278	1.18215e+44
GO:0032592	integral component of mitochondrial membrane	cellular_component	0.45315	1	5	6525	15	24278	1.1821e+44
GO:0098573	intrinsic component of mitochondrial membrane	cellular_component	0.45315	1	5	6525	15	24278	1.18222e+44
GO:0046917	triphosphoribosyl-dephospho-CoA synthase activity	molecular_function	0.454	1	1	6525	2	24278	118230664
GO:0006077	(1->6)-beta-D-glucan metabolic process	biological_process	0.45432	1	1	6525	2	24278	118236293
GO:0006078	(1->6)-beta-D-glucan biosynthetic process	biological_process	0.45432	1	1	6525	2	24278	118236293
GO:0000813	ESCRT I complex	cellular_component	0.45534	1	1	6525	2	24278	118224900
GO:0032509	endosome transport via multivesicular body sorting pathway	biological_process	0.45534	1	1	6525	2	24278	118224900
GO:0036452	ESCRT complex	cellular_component	0.45534	1	1	6525	2	24278	118224900
GO:0004609	phosphatidylserine decarboxylase activity	molecular_function	0.45554	1	2	6525	5	24278	1.18216e+17
GO:0008817	cob(I)yrinic acid a,c-diamide adenosyltransferase activity	molecular_function	0.45587	1	1	6525	2	24278	118215706
GO:0004788	thiamine diphosphokinase activity	molecular_function	0.45602	1	1	6525	2	24278	118206335
GO:0005313	L-glutamate transmembrane transporter activity	molecular_function	0.45716	1	1	6525	2	24278	118216754
GO:0015172	acidic amino acid transmembrane transporter activity	molecular_function	0.45716	1	1	6525	2	24278	118216754
GO:0015501	glutamate:sodium symporter activity	molecular_function	0.45716	1	1	6525	2	24278	118216754
GO:0015800	acidic amino acid transport	biological_process	0.45716	1	1	6525	2	24278	118216754
GO:0015807	L-amino acid transport	biological_process	0.45716	1	1	6525	2	24278	118216754
GO:0015813	L-glutamate transport	biological_process	0.45716	1	1	6525	2	24278	118216754
GO:0016433	rRNA (adenine) methyltransferase activity	molecular_function	0.45775	1	1	6525	2	24278	118223989
GO:0006743	ubiquinone metabolic process	biological_process	0.45794	1	3	6525	9	24278	1.18232e+26
GO:0006744	ubiquinone biosynthetic process	biological_process	0.45794	1	3	6525	9	24278	1.18223e+26
GO:0004427	inorganic diphosphatase activity	molecular_function	0.45912	1	3	6525	9	24278	1.18228e+26
GO:0030674	protein binding, bridging	molecular_function	0.45913	1	55	6525	205	24278	118214143,118225995,118221491,118229465,118229081,118220673,118237385,118216038,118210579,118217697,118234361,118228248,118213966,118217901,118219217,118223545,118218466,118215483,118221154,118225128,118237233,118213172,118225293,118221415,118226011,118217214,118226760,118225984,118212376,118234363,118227450,118219905,118231795,118217330,118206211,118221155,118216376,118226952,118207182,118237269…
GO:0060090	binding, bridging	molecular_function	0.45913	1	55	6525	205	24278	118226760,118217214,118226011,118212376,118225984,118234363,118237233,118221415,118213172,118225293,118215483,118218466,118225128,118221154,118234361,118228248,118219217,118223545,118213966,118217901,118237385,118220673,118229081,118217697,118216038,118210579,118229465,118221491,118214143,118225995,118208177,118225983,118225953,118221538,118220131,118234358,118236711,118211930,118216564,118210697…
GO:0042173	regulation of sporulation resulting in formation of a cellular spore	biological_process	0.45935	1	1	6525	2	24278	118211897
GO:0043937	regulation of sporulation	biological_process	0.45935	1	1	6525	2	24278	118211897
GO:0043938	positive regulation of sporulation	biological_process	0.45935	1	1	6525	2	24278	118211897
GO:0045597	positive regulation of cell differentiation	biological_process	0.45935	1	1	6525	2	24278	118211897
GO:0045881	positive regulation of sporulation resulting in formation of a cellular spore	biological_process	0.45935	1	1	6525	2	24278	118211897
GO:0019915	lipid storage	biological_process	0.45962	1	10	6525	33	24278	1.18224e+89
GO:0017003	protein-heme linkage	biological_process	0.46055	1	1	6525	2	24278	118231256
GO:0016569	covalent chromatin modification	biological_process	0.46056	1	16	6525	54	24278	118215149,118230005,118233871,118214620,118229252,118232106,118234483,118222287,118217995,118233950,118213014,118223483,XLOC_168682,118208326,118236512,118223458
GO:0016570	histone modification	biological_process	0.46056	1	16	6525	54	24278	118217995,118222287,118234483,118229252,118232106,118223458,118208326,118236512,XLOC_168682,118233950,118223483,118213014,118230005,118215149,118233871,118214620
GO:0050830	defense response to Gram-positive bacterium	biological_process	0.46075	1	7	6525	22	24278	1.18221e+62
GO:0000446	nucleoplasmic THO complex	cellular_component	0.46093	1	1	6525	2	24278	118234279
GO:0021537	telencephalon development	biological_process	0.46119	1	1	6525	2	24278	118222531
GO:0021543	pallium development	biological_process	0.46119	1	1	6525	2	24278	118222531
GO:0021987	cerebral cortex development	biological_process	0.46119	1	1	6525	2	24278	118222531
GO:0030900	forebrain development	biological_process	0.46119	1	1	6525	2	24278	118222531
GO:0009966	regulation of signal transduction	biological_process	0.46123	1	95	6525	328	24278	118230275,118221823,118207483,118207422,118231891,118230380,118221234,118209063,118225868,118233650,118214520,118217143,118210610,118206454,118231067,118233645,118208041,118212770,118206655,118210147,118208401,118216826,118226289,118216012,118215697,118211383,118235426,118220362,118227066,118217981,118217672,118212542,118213264,118222230,118224747,118231779,118210651,118235263,118224751,118218086…
GO:0003883	CTP synthase activity	molecular_function	0.46141	1	1	6525	2	24278	118210009
GO:0000087	mitotic M phase	biological_process	0.46254	1	9	6525	31	24278	1.18236e+80
GO:0098763	mitotic cell cycle phase	biological_process	0.46254	1	9	6525	31	24278	1.18224e+80
GO:0001934	positive regulation of protein phosphorylation	biological_process	0.46396	1	5	6525	17	24278	1.18234e+44
GO:0042327	positive regulation of phosphorylation	biological_process	0.46396	1	5	6525	17	24278	1.18234e+44
GO:0006106	fumarate metabolic process	biological_process	0.46396	1	3	6525	9	24278	1.18218e+26
GO:0006486	protein glycosylation	biological_process	0.46403	1	40	6525	144	24278	118232322,118217352,118233668,118229477,118213361,118224285,118230247,118214726,118237498,118220433,118230472,118219081,118216489,118209113,118237443,118215032,118219803,118224570,118234825,118222861,118231096,118213007,118231201,118222571,118225686,118220399,118225078,118237179,118213700,118217939,118237263,118207563,118219982,118235058,118214790,118222370,118210074,118226264,118229040,118210577
GO:0043413	macromolecule glycosylation	biological_process	0.46403	1	40	6525	144	24278	118214790,118235058,118207563,118219982,118237263,118217939,118213700,118226264,118229040,118210577,118210074,118222370,118231201,118213007,118231096,118225078,118237179,118220399,118225686,118222571,118237443,118209113,118216489,118222861,118234825,118224570,118219803,118215032,118213361,118229477,118233668,118217352,118232322,118230472,118220433,118219081,118214726,118237498,118230247,118224285
GO:0070085	glycosylation	biological_process	0.46403	1	40	6525	144	24278	118234825,118222861,118215032,118219803,118224570,118209113,118237443,118216489,118220433,118230472,118219081,118224285,118230247,118237498,118214726,118233668,118217352,118229477,118213361,118232322,118210577,118229040,118226264,118222370,118210074,118214790,118213700,118217939,118237263,118207563,118219982,118235058,118225686,118220399,118225078,118237179,118222571,118231201,118231096,118213007
GO:0007267	cell-cell signaling	biological_process	0.46419	1	6	6525	20	24278	1.18226e+53
GO:0051168	nuclear export	biological_process	0.46541	1	9	6525	32	24278	1.18216e+80
GO:0006783	heme biosynthetic process	biological_process	0.46574	1	7	6525	23	24278	1.18208e+62
GO:0008811	chloramphenicol O-acetyltransferase activity	molecular_function	0.46644	1	1	6525	2	24278	118228941
GO:0022611	dormancy process	biological_process	0.46664	1	1	6525	2	24278	118213778
GO:0016641	oxidoreductase activity, acting on the CH-NH2 group of donors, oxygen as acceptor	molecular_function	0.46845	1	7	6525	22	24278	1.18234e+62
GO:0018149	peptide cross-linking	biological_process	0.4686	1	9	6525	30	24278	1.1821e+80
GO:0050750	low-density lipoprotein particle receptor binding	molecular_function	0.46861	1	2	6525	6	24278	1.18235e+17
GO:0070325	lipoprotein particle receptor binding	molecular_function	0.46861	1	2	6525	6	24278	1.18215e+17
GO:0004308	exo-alpha-sialidase activity	molecular_function	0.4688	1	3	6525	9	24278	1.18214e+26
GO:0016997	alpha-sialidase activity	molecular_function	0.4688	1	3	6525	9	24278	1.18229e+26
GO:0005335	serotonin:sodium symporter activity	molecular_function	0.46912	1	1	6525	2	24278	118219023
GO:0008504	monoamine transmembrane transporter activity	molecular_function	0.46912	1	1	6525	2	24278	118219023
GO:0015222	serotonin transmembrane transporter activity	molecular_function	0.46912	1	1	6525	2	24278	118219023
GO:0019784	NEDD8-specific protease activity	molecular_function	0.46961	1	1	6525	2	24278	118215497
GO:0039693	viral DNA genome replication	biological_process	0.46961	1	1	6525	2	24278	118215497
GO:0044034	multi-organism biosynthetic process	biological_process	0.46961	1	1	6525	2	24278	118215497
GO:0052547	regulation of peptidase activity	biological_process	0.47063	1	9	6525	31	24278	1.18229e+80
GO:0052548	regulation of endopeptidase activity	biological_process	0.47063	1	9	6525	31	24278	1.18219e+80
GO:0017153	sodium:dicarboxylate symporter activity	molecular_function	0.47078	1	6	6525	20	24278	1.18228e+53
GO:0046812	host cell surface binding	molecular_function	0.4709	1	6	6525	20	24278	1.18236e+53
GO:0009249	protein lipoylation	biological_process	0.47159	1	1	6525	2	24278	118235161
GO:0018065	protein-cofactor linkage	biological_process	0.47159	1	1	6525	2	24278	118235161
GO:0015298	solute:cation antiporter activity	molecular_function	0.47248	1	8	6525	26	24278	1.18235e+71
GO:0015299	solute:proton antiporter activity	molecular_function	0.47248	1	8	6525	26	24278	1.18235e+71
GO:0004325	ferrochelatase activity	molecular_function	0.47252	1	1	6525	2	24278	118213071
GO:0051499	D-aminoacyl-tRNA deacylase activity	molecular_function	0.47346	1	1	6525	2	24278	118209323
GO:0009415	response to water	biological_process	0.47388	1	9	6525	29	24278	1.18215e+80
GO:0051239	regulation of multicellular organismal process	biological_process	0.47404	1	38	6525	133	24278	118231293,118228853,118212222,118236719,118219274,118232898,118213788,118235572,118222610,118212446,118211697,118229021,118228984,118210979,118230701,118230877,118222218,118207245,118231073,118219368,118226765,118213787,118223589,118210697,118223730,118209690,118210799,118223851,118211762,118226103,118221954,118223175,118234599,118229453,118231328,XLOC_283220,118214653,118221234
GO:0023051	regulation of signaling	biological_process	0.47477	1	97	6525	336	24278	118219365,118210532,118211106,118207440,118237156,118224653,118211301,118223730,118209999,118215735,118231065,118223175,118226261,118223119,118216205,118212589,118210566,118230331,118225857,118218895,118226292,118235453,118231588,118219089,118217660,118207956,118233709,118211197,118212137,118212348,118236620,118228092,118223772,118211360,118235718,118235449,118208562,118221113,118208358,118211777…
GO:0006471	protein ADP-ribosylation	biological_process	0.47477	1	3	6525	9	24278	1.1822e+26
GO:0008289	lipid binding	molecular_function	0.47566	1	127	6525	462	24278	118229992,118209063,118210283,118228462,118211635,118237534,118208473,118211823,118228956,118221081,118230442,118209467,118208118,118206980,118212943,118234358,118225489,118212215,118210086,118223431,118235411,118207403,118232260,118207182,118229527,118234320,118219931,118228882,118221437,118223472,118220937,118212518,118217151,118229565,118228880,118237290,118234363,118225996,118216852,118209461…
GO:0019310	inositol catabolic process	biological_process	0.47635	1	1	6525	2	24278	118225466
GO:0046164	alcohol catabolic process	biological_process	0.47635	1	1	6525	2	24278	118225466
GO:0046174	polyol catabolic process	biological_process	0.47635	1	1	6525	2	24278	118225466
GO:0050113	inositol oxygenase activity	molecular_function	0.47635	1	1	6525	2	24278	118225466
GO:1901616	organic hydroxy compound catabolic process	biological_process	0.47635	1	1	6525	2	24278	118225466
GO:0005815	microtubule organizing center	cellular_component	0.47643	1	24	6525	87	24278	118223335,118218729,118217743,118230085,XLOC_265637,118225567,118214249,118208976,118229533,118226760,118237477,118234736,118229402,118207830,118218115,118224160,118208647,118215775,118211856,118225468,118231156,118215779,118235585,118219227
GO:0030472	mitotic spindle organization in nucleus	biological_process	0.47713	1	1	6525	2	24278	118214836
GO:0004198	calcium-dependent cysteine-type endopeptidase activity	molecular_function	0.47724	1	9	6525	31	24278	1.18236e+80
GO:0046688	response to copper ion	biological_process	0.47767	1	1	6525	2	24278	118222896
GO:0000977	RNA polymerase II regulatory region sequence-specific DNA binding	molecular_function	0.47769	1	1	6525	2	24278	118210504
GO:0000978	RNA polymerase II core promoter proximal region sequence-specific DNA binding	molecular_function	0.47769	1	1	6525	2	24278	118210504
GO:0000982	transcription factor activity, RNA polymerase II core promoter proximal region sequence-specific binding	molecular_function	0.47769	1	1	6525	2	24278	118210504
GO:0000987	core promoter proximal region sequence-specific DNA binding	molecular_function	0.47769	1	1	6525	2	24278	118210504
GO:0001012	RNA polymerase II regulatory region DNA binding	molecular_function	0.47769	1	1	6525	2	24278	118210504
GO:0001159	core promoter proximal region DNA binding	molecular_function	0.47769	1	1	6525	2	24278	118210504
GO:0072330	monocarboxylic acid biosynthetic process	biological_process	0.47821	1	16	6525	57	24278	1.18232e+143
GO:0008238	exopeptidase activity	molecular_function	0.47869	1	37	6525	136	24278	118219716,118230005,118219856,118222207,118228457,118232990,118230228,118217750,118231315,118221750,118215535,118218095,118217723,118234361,118228308,118226489,118224015,118216467,118228789,118219160,118222523,118207724,118217678,118209714,118206469,118217844,118224650,118214850,118212609,118237424,118210127,118223199,118220424,118212648,118208412,118221540,118228070
GO:0010646	regulation of cell communication	biological_process	0.47901	1	95	6525	329	24278	118231065,118223175,118226261,118223119,118212589,118216205,118230331,118210566,118225857,118235453,118226292,118218895,118219365,118207440,118237156,118224653,118211106,118210532,118211301,118223730,118215735,118209999,118228092,118223772,118235449,118235718,118211360,118208358,118221113,118208562,118211777,118228082,118213841,118221328,118231588,118219089,118217660,118211197,118207956,118233709…
GO:0030658	transport vesicle membrane	cellular_component	0.4799	1	18	6525	62	24278	1.18216e+161
GO:0034069	aminoglycoside N-acetyltransferase activity	molecular_function	0.48026	1	1	6525	2	24278	118233422
GO:0046353	aminoglycoside 3-N-acetyltransferase activity	molecular_function	0.48026	1	1	6525	2	24278	118233422
GO:0004181	metallocarboxypeptidase activity	molecular_function	0.48094	1	7	6525	24	24278	1.18228e+62
GO:0001525	angiogenesis	biological_process	0.48121	1	5	6525	16	24278	1.18224e+44
GO:0001568	blood vessel development	biological_process	0.48121	1	5	6525	16	24278	1.18221e+44
GO:0001944	vasculature development	biological_process	0.48121	1	5	6525	16	24278	1.18212e+44
GO:0045765	regulation of angiogenesis	biological_process	0.48121	1	5	6525	16	24278	1.18223e+44
GO:0048514	blood vessel morphogenesis	biological_process	0.48121	1	5	6525	16	24278	1.18221e+44
GO:0072358	cardiovascular system development	biological_process	0.48121	1	5	6525	16	24278	1.18212e+44
GO:0072359	circulatory system development	biological_process	0.48121	1	5	6525	16	24278	1.18223e+44
GO:1901342	regulation of vasculature development	biological_process	0.48121	1	5	6525	16	24278	1.18221e+44
GO:0004097	catechol oxidase activity	molecular_function	0.48204	1	2	6525	6	24278	1.18235e+17
GO:0007157	heterophilic cell-cell adhesion via plasma membrane cell adhesion molecules	biological_process	0.4821	1	4	6525	13	24278	1.18228e+35
GO:0046789	host cell surface receptor binding	molecular_function	0.48266	1	5	6525	17	24278	1.18236e+44
GO:0010212	response to ionizing radiation	biological_process	0.48293	1	1	6525	2	24278	118214659
GO:0071214	cellular response to abiotic stimulus	biological_process	0.48293	1	1	6525	2	24278	118214659
GO:0071478	cellular response to radiation	biological_process	0.48293	1	1	6525	2	24278	118214659
GO:0071479	cellular response to ionizing radiation	biological_process	0.48293	1	1	6525	2	24278	118214659
GO:0005516	calmodulin binding	molecular_function	0.48298	1	16	6525	54	24278	1.18222e+143
GO:0016108	tetraterpenoid metabolic process	biological_process	0.48318	1	8	6525	28	24278	1.18231e+71
GO:0016109	tetraterpenoid biosynthetic process	biological_process	0.48318	1	8	6525	28	24278	1.1821e+71
GO:0016116	carotenoid metabolic process	biological_process	0.48318	1	8	6525	28	24278	1.1821e+71
GO:0016117	carotenoid biosynthetic process	biological_process	0.48318	1	8	6525	28	24278	1.18235e+71
GO:0031418	L-ascorbic acid binding	molecular_function	0.48434	1	1	6525	2	24278	118215720
GO:0051341	regulation of oxidoreductase activity	biological_process	0.4846	1	1	6525	2	24278	118212976
GO:0051354	negative regulation of oxidoreductase activity	biological_process	0.4846	1	1	6525	2	24278	118212976
GO:1900757	regulation of D-amino-acid oxidase activity	biological_process	0.4846	1	1	6525	2	24278	118212976
GO:1900758	negative regulation of D-amino-acid oxidase activity	biological_process	0.4846	1	1	6525	2	24278	118212976
GO:0016657	oxidoreductase activity, acting on NAD(P)H, nitrogenous group as acceptor	molecular_function	0.48487	1	2	6525	6	24278	1.18222e+17
GO:0033739	preQ1 synthase activity	molecular_function	0.48487	1	2	6525	6	24278	1.18218e+17
GO:0005942	phosphatidylinositol 3-kinase complex	cellular_component	0.48624	1	5	6525	16	24278	1.18216e+44
GO:0005944	phosphatidylinositol 3-kinase complex, class IB	cellular_component	0.48624	1	5	6525	16	24278	1.18224e+44
GO:0035014	phosphatidylinositol 3-kinase regulator activity	molecular_function	0.48624	1	5	6525	16	24278	1.18216e+44
GO:0046935	1-phosphatidylinositol-3-kinase regulator activity	molecular_function	0.48624	1	5	6525	16	24278	1.18216e+44
GO:0097651	phosphatidylinositol 3-kinase complex, class I	cellular_component	0.48624	1	5	6525	16	24278	1.18224e+44
GO:0004022	alcohol dehydrogenase (NAD) activity	molecular_function	0.48653	1	1	6525	2	24278	118207034
GO:0015945	methanol metabolic process	biological_process	0.48653	1	1	6525	2	24278	118207034
GO:0015946	methanol oxidation	biological_process	0.48653	1	1	6525	2	24278	118207034
GO:0034308	primary alcohol metabolic process	biological_process	0.48653	1	1	6525	2	24278	118207034
GO:0008384	IkappaB kinase activity	molecular_function	0.48782	1	3	6525	9	24278	1.18226e+26
GO:0034599	cellular response to oxidative stress	biological_process	0.48837	1	2	6525	5	24278	1.1823e+17
GO:0019060	intracellular transport of viral protein in host cell	biological_process	0.4885	1	1	6525	2	24278	118233668
GO:0030581	symbiont intracellular protein transport in host	biological_process	0.4885	1	1	6525	2	24278	118233668
GO:0046719	regulation by virus of viral protein levels in host cell	biological_process	0.4885	1	1	6525	2	24278	118233668
GO:0051708	intracellular protein transport in other organism involved in symbiotic interaction	biological_process	0.4885	1	1	6525	2	24278	118233668
GO:0044093	positive regulation of molecular function	biological_process	0.4886	1	13	6525	46	24278	1.18222e+116
GO:0043461	proton-transporting ATP synthase complex assembly	biological_process	0.48881	1	1	6525	2	24278	118221864
GO:0070272	proton-transporting ATP synthase complex biogenesis	biological_process	0.48881	1	1	6525	2	24278	118221864
GO:0004489	methylenetetrahydrofolate reductase (NAD(P)H) activity	molecular_function	0.49003	1	1	6525	2	24278	118213699
GO:0004064	arylesterase activity	molecular_function	0.49049	1	4	6525	12	24278	1.1823e+35
GO:0019207	kinase regulator activity	molecular_function	0.49126	1	22	6525	78	24278	1.18216e+197
GO:0030133	transport vesicle	cellular_component	0.4921	1	23	6525	82	24278	1.18214e+206
GO:0030695	GTPase regulator activity	molecular_function	0.49259	1	41	6525	143	24278	118230887,118222287,118211315,118210635,118213843,118225836,118210861,118218174,118207311,118206513,118235713,118212712,118218356,118232558,118212966,118211593,118212542,118217981,118210192,118217672,118230548,118212770,118211106,118232614,118234701,118208605,118235452,118233814,118216666,118217162,118224174,XLOC_283220,118228115,118208071,118230275,118227455,118216931,118210520,118225489,1182074…
GO:0006066	alcohol metabolic process	biological_process	0.49407	1	12	6525	43	24278	1.18231e+107
GO:0012506	vesicle membrane	cellular_component	0.49438	1	23	6525	81	24278	1.18208e+206
GO:0051345	positive regulation of hydrolase activity	biological_process	0.49491	1	6	6525	20	24278	1.18227e+53
GO:0010821	regulation of mitochondrion organization	biological_process	0.49517	1	3	6525	9	24278	1.18237e+26
GO:0010822	positive regulation of mitochondrion organization	biological_process	0.49517	1	3	6525	9	24278	1.18237e+26
GO:0090199	regulation of release of cytochrome c from mitochondria	biological_process	0.49517	1	3	6525	9	24278	1.18216e+26
GO:0090200	positive regulation of release of cytochrome c from mitochondria	biological_process	0.49517	1	3	6525	9	24278	1.18216e+26
GO:0097193	intrinsic apoptotic signaling pathway	biological_process	0.49517	1	3	6525	9	24278	1.18216e+26
GO:2001233	regulation of apoptotic signaling pathway	biological_process	0.49517	1	3	6525	9	24278	1.18216e+26
GO:2001235	positive regulation of apoptotic signaling pathway	biological_process	0.49517	1	3	6525	9	24278	1.18216e+26
GO:0016881	acid-amino acid ligase activity	molecular_function	0.49597	1	14	6525	47	24278	1.18236e+125
GO:0019478	D-amino acid catabolic process	biological_process	0.49608	1	2	6525	6	24278	1.1823e+17
GO:0046416	D-amino acid metabolic process	biological_process	0.49608	1	2	6525	6	24278	1.18224e+17
GO:0006493	protein O-linked glycosylation	biological_process	0.49664	1	3	6525	9	24278	1.18215e+26
GO:0019748	secondary metabolic process	biological_process	0.49692	1	16	6525	57	24278	1.18209e+143
GO:0002685	regulation of leukocyte migration	biological_process	0.4975	1	2	6525	6	24278	1.18224e+17
GO:0050854	regulation of antigen receptor-mediated signaling pathway	biological_process	0.4975	1	2	6525	6	24278	1.18224e+17
GO:0050855	regulation of B cell receptor signaling pathway	biological_process	0.4975	1	2	6525	6	24278	1.18235e+17
GO:0050900	leukocyte migration	biological_process	0.4975	1	2	6525	6	24278	1.18235e+17
GO:0072676	lymphocyte migration	biological_process	0.4975	1	2	6525	6	24278	1.18224e+17
GO:2000401	regulation of lymphocyte migration	biological_process	0.4975	1	2	6525	6	24278	1.18224e+17
GO:0030474	spindle pole body duplication	biological_process	0.49815	1	10	6525	36	24278	1.18219e+89
GO:0051300	spindle pole body organization	biological_process	0.49815	1	10	6525	36	24278	1.1823e+89
GO:0009225	nucleotide-sugar metabolic process	biological_process	0.49952	1	2	6525	6	24278	1.18231e+17
GO:0015074	DNA integration	biological_process	0.5016	1	42	6525	152	24278	118231362,118233879,118233575,118220139,118206818,118209186,118210039,118230394,118223032,XLOC_283220,118219761,118209203,118220534,118210178,118209570,118227420,118218924,118232849,118231011,118221110,118233934,118228864,118231294,118206694,118228162,118225886,118219502,118227375,118235053,118217726,118235474,118219823,118211275,118216292,118231921,118233430,118234392,118209016,118219919,1182233…
GO:1901615	organic hydroxy compound metabolic process	biological_process	0.50188	1	17	6525	62	24278	1.18236e+152
GO:0045735	nutrient reservoir activity	molecular_function	0.50271	1	6	6525	21	24278	1.18237e+53
GO:0007417	central nervous system development	biological_process	0.50273	1	2	6525	6	24278	1.18223e+17
GO:0007420	brain development	biological_process	0.50273	1	2	6525	6	24278	1.18223e+17
GO:0060322	head development	biological_process	0.50273	1	2	6525	6	24278	1.18223e+17
GO:0004655	porphobilinogen synthase activity	molecular_function	0.50289	1	1	6525	2	24278	118227287
GO:0044781	bacterial-type flagellum organization	biological_process	0.50298	1	6	6525	20	24278	1.18213e+53
GO:0004057	arginyltransferase activity	molecular_function	0.50329	1	3	6525	9	24278	1.18214e+26
GO:0016598	protein arginylation	biological_process	0.50329	1	3	6525	9	24278	1.18214e+26
GO:0006888	ER to Golgi vesicle-mediated transport	biological_process	0.50355	1	16	6525	57	24278	1.18235e+143
GO:0071771	aldehyde decarbonylase activity	molecular_function	0.50367	1	1	6525	2	24278	118216079
GO:0046365	monosaccharide catabolic process	biological_process	0.5039	1	2	6525	6	24278	1.1821e+17
GO:0004061	arylformamidase activity	molecular_function	0.50533	1	2	6525	6	24278	1.18235e+17
GO:0016052	carbohydrate catabolic process	biological_process	0.50543	1	19	6525	70	24278	1.18209e+170
GO:0030244	cellulose biosynthetic process	biological_process	0.50548	1	2	6525	6	24278	1.18228e+17
GO:0019083	viral transcription	biological_process	0.50569	1	8	6525	27	24278	1.18223e+71
GO:0030659	cytoplasmic vesicle membrane	cellular_component	0.50587	1	22	6525	78	24278	1.18222e+197
GO:0071203	WASH complex	cellular_component	0.50592	1	9	6525	31	24278	1.18209e+80
GO:0016662	oxidoreductase activity, acting on other nitrogenous compounds as donors, cytochrome as acceptor	molecular_function	0.50611	1	2	6525	6	24278	1.18225e+17
GO:0042279	nitrite reductase (cytochrome, ammonia-forming) activity	molecular_function	0.50611	1	2	6525	6	24278	1.18223e+17
GO:0032990	cell part morphogenesis	biological_process	0.50612	1	15	6525	54	24278	1.18226e+134
GO:0048858	cell projection morphogenesis	biological_process	0.50612	1	15	6525	54	24278	1.18225e+134
GO:0006778	porphyrin-containing compound metabolic process	biological_process	0.50731	1	24	6525	86	24278	1.18234e+215
GO:0019438	aromatic compound biosynthetic process	biological_process	0.50745	1	1010	6525	3705	24278	118211632,118215400,118207950,118231061,118236547,118225299,118229550,118227205,118235385,118229553,118206914,118210090,118222779,118214918,118232763,118220565,118216187,118229252,118226564,118209433,118229360,118209044,118237204,118216267,118209281,118232357,118224081,118223802,118215006,118216433,118213014,118232937,118217691,118215693,118225179,118222237,118221748,118232297,118228301,118213071…
GO:0016854	racemase and epimerase activity	molecular_function	0.50759	1	6	6525	20	24278	1.18215e+53
GO:0008201	heparin binding	molecular_function	0.50846	1	7	6525	24	24278	1.18215e+62
GO:0034654	nucleobase-containing compound biosynthetic process	biological_process	0.50871	1	961	6525	3525	24278	118209856,118214264,118225097,118222525,118228377,118222594,118211265,118218995,118217019,118224947,118217556,118211615,118236654,118232299,118235389,118227879,118215746,118214066,118220984,118219748,118234358,118223880,118228188,118228313,118231974,118231362,118211823,118235890,118209418,118210963,118213415,118223032,118206726,118234405,118236733,118233561,118213061,118215775,118234318,118212085…
GO:0009063	cellular amino acid catabolic process	biological_process	0.50873	1	10	6525	35	24278	1.18232e+89
GO:1901606	alpha-amino acid catabolic process	biological_process	0.50887	1	8	6525	28	24278	1.18226e+71
GO:0008948	oxaloacetate decarboxylase activity	molecular_function	0.50996	1	15	6525	52	24278	118224820,118228254,118216956,118232096,118231027,118214454,118227329,118220143,XLOC_090711,118235894,118226778,118227069,118216851,118221910,118222458
GO:0035725	sodium ion transmembrane transport	biological_process	0.50996	1	15	6525	52	24278	118224820,118216956,118228254,118232096,118231027,118214454,118227329,118220143,118235894,XLOC_090711,118226778,118227069,118216851,118221910,118222458
GO:0071436	sodium ion export	biological_process	0.50996	1	15	6525	52	24278	118228254,118232096,118231027,118216956,118220143,118227329,118214454,118224820,118221910,118216851,118222458,118226778,XLOC_090711,118235894,118227069
GO:0017176	phosphatidylinositol N-acetylglucosaminyltransferase activity	molecular_function	0.5102	1	5	6525	17	24278	1.18228e+44
GO:0006900	membrane budding	biological_process	0.51057	1	4	6525	13	24278	1.18224e+35
GO:0006901	vesicle coating	biological_process	0.51057	1	4	6525	13	24278	1.18224e+35
GO:0007212	dopamine receptor signaling pathway	biological_process	0.51057	1	4	6525	13	24278	1.18224e+35
GO:0030276	clathrin binding	molecular_function	0.51057	1	4	6525	13	24278	1.18224e+35
GO:0032051	clathrin light chain binding	molecular_function	0.51057	1	4	6525	13	24278	1.18235e+35
GO:0048268	clathrin coat assembly	biological_process	0.51057	1	4	6525	13	24278	1.18224e+35
GO:0008851	ethanolamine ammonia-lyase activity	molecular_function	0.51071	1	1	6525	2	24278	118210516
GO:0006119	oxidative phosphorylation	biological_process	0.51151	1	14	6525	51	24278	1.18231e+125
GO:0042773	ATP synthesis coupled electron transport	biological_process	0.51151	1	14	6525	51	24278	1.18211e+125
GO:0070011	peptidase activity, acting on L-amino acid peptides	molecular_function	0.51204	1	325	6525	1204	24278	118234709,118210285,118212216,118216125,118228815,118218318,118227951,118231079,118225134,118212312,118235511,118227085,118220424,118223851,118216736,118223027,118221100,118232064,118217844,118213402,118234219,118211390,118223762,118217678,118235905,118234490,118221156,118221866,118207117,118232566,118233658,118234483,118229213,118224015,118226489,118231898,118231315,118212152,118215535,118212924…
GO:0008408	3'-5' exonuclease activity	molecular_function	0.51222	1	16	6525	57	24278	1.18227e+143
GO:0005198	structural molecule activity	molecular_function	0.5123	1	356	6525	1312	24278	118219179,118217766,118218327,118214008,118225984,118215298,118217291,118218466,118235515,118221789,118223977,118213172,118216511,118234968,118230887,118210579,118225628,118222562,118237257,118218299,118220555,118217906,118211588,118222134,118206817,118212080,118221326,118229501,118216735,118222800,XLOC_090711,118210895,118206578,118215164,118214568,118210801,118214884,118235170,118211587,1182164…
GO:0048584	positive regulation of response to stimulus	biological_process	0.51232	1	25	6525	92	24278	1.18212e+224
GO:0016149	translation release factor activity, codon specific	molecular_function	0.51285	1	5	6525	18	24278	1.18221e+44
GO:0044282	small molecule catabolic process	biological_process	0.51287	1	15	6525	54	24278	1.18222e+134
GO:0005784	Sec61 translocon complex	cellular_component	0.51343	1	4	6525	12	24278	1.18215e+35
GO:0071256	translocon complex	cellular_component	0.51343	1	4	6525	12	24278	1.18215e+35
GO:0017119	Golgi transport complex	cellular_component	0.5135	1	11	6525	40	24278	1.18232e+98
GO:0005294	neutral L-amino acid secondary active transmembrane transporter activity	molecular_function	0.51508	1	1	6525	2	24278	118226206
GO:0015175	neutral amino acid transmembrane transporter activity	molecular_function	0.51508	1	1	6525	2	24278	118226206
GO:0015655	alanine:sodium symporter activity	molecular_function	0.51508	1	1	6525	2	24278	118226206
GO:0015804	neutral amino acid transport	biological_process	0.51508	1	1	6525	2	24278	118226206
GO:0022858	alanine transmembrane transporter activity	molecular_function	0.51508	1	1	6525	2	24278	118226206
GO:0032328	alanine transport	biological_process	0.51508	1	1	6525	2	24278	118226206
GO:0019208	phosphatase regulator activity	molecular_function	0.51526	1	7	6525	24	24278	1.18237e+62
GO:0031347	regulation of defense response	biological_process	0.51605	1	8	6525	28	24278	1.18223e+71
GO:0005802	trans-Golgi network	cellular_component	0.5161	1	4	6525	14	24278	1.18227e+35
GO:0006893	Golgi to plasma membrane transport	biological_process	0.5161	1	4	6525	14	24278	1.18211e+35
GO:0032386	regulation of intracellular transport	biological_process	0.5161	1	4	6525	14	24278	1.18227e+35
GO:0032388	positive regulation of intracellular transport	biological_process	0.5161	1	4	6525	14	24278	1.18211e+35
GO:0033157	regulation of intracellular protein transport	biological_process	0.5161	1	4	6525	14	24278	1.18211e+35
GO:0042996	regulation of Golgi to plasma membrane protein transport	biological_process	0.5161	1	4	6525	14	24278	1.18211e+35
GO:0042998	positive regulation of Golgi to plasma membrane protein transport	biological_process	0.5161	1	4	6525	14	24278	1.18211e+35
GO:0043001	Golgi to plasma membrane protein transport	biological_process	0.5161	1	4	6525	14	24278	1.18211e+35
GO:0051222	positive regulation of protein transport	biological_process	0.5161	1	4	6525	14	24278	1.18208e+35
GO:0071253	connexin binding	molecular_function	0.5161	1	4	6525	14	24278	1.18235e+35
GO:0072659	protein localization to plasma membrane	biological_process	0.5161	1	4	6525	14	24278	1.18211e+35
GO:0090002	establishment of protein localization to plasma membrane	biological_process	0.5161	1	4	6525	14	24278	1.18227e+35
GO:0090003	regulation of establishment of protein localization to plasma membrane	biological_process	0.5161	1	4	6525	14	24278	1.18211e+35
GO:0090004	positive regulation of establishment of protein localization to plasma membrane	biological_process	0.5161	1	4	6525	14	24278	1.18227e+35
GO:0090316	positive regulation of intracellular protein transport	biological_process	0.5161	1	4	6525	14	24278	1.18211e+35
GO:1903076	regulation of protein localization to plasma membrane	biological_process	0.5161	1	4	6525	14	24278	1.18227e+35
GO:1903078	positive regulation of protein localization to plasma membrane	biological_process	0.5161	1	4	6525	14	24278	1.18208e+35
GO:1903649	regulation of cytoplasmic transport	biological_process	0.5161	1	4	6525	14	24278	1.18227e+35
GO:1903651	positive regulation of cytoplasmic transport	biological_process	0.5161	1	4	6525	14	24278	1.18227e+35
GO:1903729	regulation of plasma membrane organization	biological_process	0.5161	1	4	6525	14	24278	1.18227e+35
GO:1903827	regulation of cellular protein localization	biological_process	0.5161	1	4	6525	14	24278	1.18211e+35
GO:1903829	positive regulation of cellular protein localization	biological_process	0.5161	1	4	6525	14	24278	1.18211e+35
GO:1904375	regulation of protein localization to cell periphery	biological_process	0.5161	1	4	6525	14	24278	1.18227e+35
GO:1904377	positive regulation of protein localization to cell periphery	biological_process	0.5161	1	4	6525	14	24278	1.18211e+35
GO:1990778	protein localization to cell periphery	biological_process	0.5161	1	4	6525	14	24278	1.18235e+35
GO:0030089	phycobilisome	cellular_component	0.51696	1	2	6525	6	24278	1.18215e+17
GO:0042132	fructose 1,6-bisphosphate 1-phosphatase activity	molecular_function	0.51741	1	2	6525	6	24278	1.18207e+17
GO:0006935	chemotaxis	biological_process	0.51744	1	22	6525	81	24278	118214284,118227124,118234374,118236206,118231094,118214574,118213306,118209159,118208864,118224517,118222295,118217691,118207402,118223333,118211130,118225636,118237514,118216182,118222281,118208295,118232096,XLOC_265637
GO:0005199	structural constituent of cell wall	molecular_function	0.5177	1	3	6525	9	24278	1.18211e+26
GO:0008849	enterochelin esterase activity	molecular_function	0.51817	1	1	6525	2	24278	118217733
GO:0009892	negative regulation of metabolic process	biological_process	0.51884	1	54	6525	196	24278	118209794,118223945,118215069,118217178,118233168,118234827,118222349,118210624,118209043,118235521,118236733,118212995,118218788,118209641,118210154,118213650,118234757,118234305,118231347,118219163,118210970,118210658,118211823,118234637,118207269,118206979,118224997,118218675,118211930,118232599,118209440,XLOC_265637,118214066,118229106,118207956,118226748,118231807,118229054,118219128,1182106…
GO:0003746	translation elongation factor activity	molecular_function	0.51896	1	7	6525	25	24278	1.18208e+62
GO:0004601	peroxidase activity	molecular_function	0.52011	1	8	6525	28	24278	1.18236e+71
GO:0004789	thiamine-phosphate diphosphorylase activity	molecular_function	0.52088	1	2	6525	6	24278	1.18235e+17
GO:0071107	response to parathyroid hormone	biological_process	0.52135	1	3	6525	10	24278	1.1823e+26
GO:0042974	retinoic acid receptor binding	molecular_function	0.52205	1	2	6525	6	24278	1.18229e+17
GO:0006406	mRNA export from nucleus	biological_process	0.52279	1	7	6525	26	24278	1.1822e+62
GO:0071166	ribonucleoprotein complex localization	biological_process	0.52279	1	7	6525	26	24278	1.18234e+62
GO:0071426	ribonucleoprotein complex export from nucleus	biological_process	0.52279	1	7	6525	26	24278	1.1822e+62
GO:0071427	mRNA-containing ribonucleoprotein complex export from nucleus	biological_process	0.52279	1	7	6525	26	24278	1.1822e+62
GO:0045766	positive regulation of angiogenesis	biological_process	0.52317	1	4	6525	13	24278	1.18212e+35
GO:1904018	positive regulation of vasculature development	biological_process	0.52317	1	4	6525	13	24278	1.18221e+35
GO:0006527	arginine catabolic process	biological_process	0.52528	1	1	6525	2	24278	118217910
GO:0046131	pyrimidine ribonucleoside metabolic process	biological_process	0.52625	1	4	6525	15	24278	1.18214e+35
GO:0004340	glucokinase activity	molecular_function	0.52667	1	1	6525	2	24278	118224234
GO:0004396	hexokinase activity	molecular_function	0.52667	1	1	6525	2	24278	118224234
GO:0000079	regulation of cyclin-dependent protein serine/threonine kinase activity	biological_process	0.52739	1	2	6525	6	24278	1.18223e+17
GO:0071900	regulation of protein serine/threonine kinase activity	biological_process	0.52739	1	2	6525	6	24278	1.18217e+17
GO:1904029	regulation of cyclin-dependent protein kinase activity	biological_process	0.52739	1	2	6525	6	24278	1.18223e+17
GO:0030031	cell projection assembly	biological_process	0.52752	1	13	6525	46	24278	1.18211e+116
GO:0008235	metalloexopeptidase activity	molecular_function	0.52814	1	7	6525	25	24278	1.18222e+62
GO:0044003	modification by symbiont of host morphology or physiology	biological_process	0.52825	1	38	6525	137	24278	118227365,118227228,118206423,118222757,118208327,118232311,118236611,118225193,118232642,118215534,118233113,118224011,118224403,118223784,118234294,118211995,118216487,118234858,118221661,118235763,118232361,118207704,118234490,118235285,118219767,118216434,118219385,118216267,118214493,118233054,118206253,118213341,118230508,118223723,118231010,118235703,118212235,118215240
GO:0004180	carboxypeptidase activity	molecular_function	0.52864	1	10	6525	37	24278	1.18225e+89
GO:0042752	regulation of circadian rhythm	biological_process	0.52985	1	2	6525	6	24278	1.1821e+17
GO:0042754	negative regulation of circadian rhythm	biological_process	0.52985	1	2	6525	6	24278	1.18235e+17
GO:0009065	glutamine family amino acid catabolic process	biological_process	0.53023	1	2	6525	6	24278	1.18218e+17
GO:0009755	hormone-mediated signaling pathway	biological_process	0.53097	1	29	6525	105	24278	118233245,118231565,118231156,118206929,118207460,118215658,118228219,118230409,118208312,118211251,118227365,118208306,118216433,118209622,118225501,118229808,118215837,118228462,118229090,118215146,118213135,118234410,118235449,118229431,118218322,118206509,118208248,118214820,118211928
GO:0032870	cellular response to hormone stimulus	biological_process	0.53097	1	29	6525	105	24278	118229090,118229808,118215837,118228462,118234410,118213135,118215146,118206509,118208248,118235449,118229431,118218322,118211928,118214820,118231156,118233245,118231565,118228219,118230409,118206929,118215658,118207460,118216433,118209622,118211251,118208312,118227365,118208306,118225501
GO:0004074	biliverdin reductase activity	molecular_function	0.53161	1	2	6525	6	24278	1.18223e+17
GO:0042167	heme catabolic process	biological_process	0.53161	1	2	6525	6	24278	1.18223e+17
GO:1901361	organic cyclic compound catabolic process	biological_process	0.53186	1	37	6525	136	24278	118223032,118231500,118215428,118207104,118229407,118209462,118219923,118226103,118230025,118236475,118235050,118230338,118221358,118212922,118208628,118216189,118219121,118209194,118227382,118226494,118233705,118229374,118213061,118223499,118211590,118230376,118234107,118215219,118228817,118210390,118232480,118206924,118226857,118217667,118207501,118234592,118221140
GO:0019058	viral life cycle	biological_process	0.53228	1	126	6525	455	24278	118225604,118207931,118213172,118217760,118214643,118217750,118216952,118209923,118217088,118217291,118213841,118230499,118229649,118214637,118222281,118226421,118208583,118219787,118207489,118207292,118219089,118222618,118214635,118214636,118231588,118216399,118236394,118211776,118225845,118220427,118217289,118228308,118208527,118208038,118216641,118208348,118211910,118223119,XLOC_227793,1182239…
GO:0006625	protein targeting to peroxisome	biological_process	0.53237	1	3	6525	10	24278	1.18213e+26
GO:0043574	peroxisomal transport	biological_process	0.53237	1	3	6525	10	24278	1.18213e+26
GO:0072662	protein localization to peroxisome	biological_process	0.53237	1	3	6525	10	24278	1.18213e+26
GO:0072663	establishment of protein localization to peroxisome	biological_process	0.53237	1	3	6525	10	24278	1.18213e+26
GO:0006397	mRNA processing	biological_process	0.53265	1	78	6525	284	24278	118216387,118218356,118217219,118211998,118210784,118236022,118218161,118227444,118226760,118219642,118214005,118227991,118229394,118226145,118212599,118221747,118222680,118213038,118208190,118217184,118233358,118235763,118206249,118228781,118233172,118212979,118214520,118213439,118211856,118220418,118226971,118233645,118215775,118223945,118206313,118210147,118223071,118212714,118215650,118216933…
GO:0009401	phosphoenolpyruvate-dependent sugar phosphotransferase system	biological_process	0.53334	1	9	6525	32	24278	1.18224e+80
GO:0097223	sperm part	cellular_component	0.53365	1	2	6525	6	24278	1.18235e+17
GO:0044463	cell projection part	cellular_component	0.53381	1	6	6525	22	24278	1.18233e+53
GO:0031532	actin cytoskeleton reorganization	biological_process	0.53509	1	1	6525	2	24278	118220849
GO:0007423	sensory organ development	biological_process	0.53579	1	1	6525	2	24278	118230210
GO:0008233	peptidase activity	molecular_function	0.53734	1	351	6525	1301	24278	118229222,XLOC_090711,118216735,118224650,118227329,118221223,118220959,118210737,118210127,118233766,118225193,118226520,118219654,118221773,118234065,118226737,118211123,118228397,118216225,118234305,118237179,118214873,118235964,118219716,118233011,118236416,118214632,118212746,118228457,118233659,118216728,118227029,118210579,118230887,118221750,118208038,118217906,118219160,118224359,1182081…
GO:0005746	mitochondrial respiratory chain	cellular_component	0.53759	1	13	6525	49	24278	1.18224e+116
GO:0019236	response to pheromone	biological_process	0.53798	1	2	6525	6	24278	1.18213e+17
GO:0044270	cellular nitrogen compound catabolic process	biological_process	0.53916	1	35	6525	129	24278	118219923,118209462,118230025,118226103,118235050,118236475,118230338,118231500,118223032,118229407,118215428,118207104,118213061,118233705,118229374,118223499,118221358,118216189,118212922,118208628,118227382,118226494,118219121,118209194,118210390,118228817,118232480,118211590,118234107,118207501,118217667,118234592,118221140,118206924,118226857
GO:0046700	heterocycle catabolic process	biological_process	0.53916	1	35	6525	129	24278	118211590,118234107,118210390,118228817,118232480,118206924,118226857,118207501,118217667,118234592,118221140,118231500,118223032,118229407,118215428,118207104,118219923,118209462,118226103,118230025,118235050,118236475,118230338,118221358,118216189,118212922,118208628,118226494,118227382,118209194,118219121,118213061,118229374,118233705,118223499
GO:0003910	DNA ligase (ATP) activity	molecular_function	0.53921	1	3	6525	10	24278	1.18228e+26
GO:0004649	poly(ADP-ribose) glycohydrolase activity	molecular_function	0.53924	1	2	6525	6	24278	1.1821e+17
GO:0004407	histone deacetylase activity	molecular_function	0.53962	1	1	6525	2	24278	118236733
GO:0006342	chromatin silencing	biological_process	0.53962	1	1	6525	2	24278	118236733
GO:0006476	protein deacetylation	biological_process	0.53962	1	1	6525	2	24278	118236733
GO:0017136	NAD-dependent histone deacetylase activity	molecular_function	0.53962	1	1	6525	2	24278	118236733
GO:0033558	protein deacetylase activity	molecular_function	0.53962	1	1	6525	2	24278	118236733
GO:0034979	NAD-dependent protein deacetylase activity	molecular_function	0.53962	1	1	6525	2	24278	118236733
GO:0035601	protein deacylation	biological_process	0.53962	1	1	6525	2	24278	118236733
GO:0045814	negative regulation of gene expression, epigenetic	biological_process	0.53962	1	1	6525	2	24278	118236733
GO:0098732	macromolecule deacylation	biological_process	0.53962	1	1	6525	2	24278	118236733
GO:0008202	steroid metabolic process	biological_process	0.54006	1	15	6525	57	24278	1.18208e+134
GO:0004834	tryptophan synthase activity	molecular_function	0.54077	1	1	6525	2	24278	118223319
GO:0031399	regulation of protein modification process	biological_process	0.54108	1	20	6525	75	24278	118209043,118234305,118233902,118210147,118207956,118212348,118214094,118233168,118233957,118234827,118222738,XLOC_265637,118228092,118214066,118211930,118225128,118212857,118210970,118217140,118224997
GO:0006405	RNA export from nucleus	biological_process	0.54284	1	8	6525	30	24278	1.18225e+71
GO:0043154	negative regulation of cysteine-type endopeptidase activity involved in apoptotic process	biological_process	0.54335	1	2	6525	7	24278	1.18208e+17
GO:2000117	negative regulation of cysteine-type endopeptidase activity	biological_process	0.54335	1	2	6525	7	24278	1.18208e+17
GO:0016728	oxidoreductase activity, acting on CH or CH2 groups, disulfide as acceptor	molecular_function	0.54442	1	2	6525	6	24278	1.18217e+17
GO:0004536	deoxyribonuclease activity	molecular_function	0.54444	1	79	6525	296	24278	118207764,118225128,118221154,118227846,118222711,118223926,118225959,118229550,118219053,118208375,118225984,118214143,118225995,118229793,118231104,118207707,118225968,118208371,118231902,118210579,118214145,118217901,118213624,118226103,118207804,118219850,118227449,118217217,118217884,118208177,118237477,118234229,118231795,118210108,118212922,118214249,118218944,118234730,118236281,118228817…
GO:0019887	protein kinase regulator activity	molecular_function	0.54539	1	17	6525	62	24278	1.18219e+152
GO:0019439	aromatic compound catabolic process	biological_process	0.54666	1	39	6525	143	24278	118211590,118230376,118234107,118215219,118228817,118210390,118230877,118232480,118206924,118226857,118217667,118207501,118234592,118221140,118223032,118231500,118215428,118207104,118229407,118209462,118230025,118226103,118235050,118236475,118227401,118230338,118221358,118212922,118208628,118216189,118211106,118209194,118219121,118227382,118226494,118229374,118233705,118213061,118223499
GO:0009607	response to biotic stimulus	biological_process	0.54715	1	86	6525	313	24278	118207764,118220805,118209229,118216047,118214804,118219507,118217621,118214400,118215693,118214143,118229306,118213673,118221684,118229964,118210280,118214493,118234257,118233377,118211649,XLOC_035840,118233805,118224403,118223784,118210583,118218425,118225067,118220925,118220868,118211026,118214922,118226681,118217932,118226933,118210624,118220856,118212471,118237298,118228040,118235711,1182138…
GO:0009832	plant-type cell wall biogenesis	biological_process	0.54783	1	1	6525	2	24278	118235272
GO:0010215	cellulose microfibril organization	biological_process	0.54783	1	1	6525	2	24278	118235272
GO:0070726	cell wall assembly	biological_process	0.54783	1	1	6525	2	24278	118235272
GO:0071668	plant-type cell wall assembly	biological_process	0.54783	1	1	6525	2	24278	118235272
GO:0019855	calcium channel inhibitor activity	molecular_function	0.5487	1	8	6525	28	24278	1.18227e+71
GO:0006816	calcium ion transport	biological_process	0.54882	1	17	6525	57	24278	1.1823e+152
GO:0009074	aromatic amino acid family catabolic process	biological_process	0.549	1	4	6525	14	24278	1.18215e+35
GO:0004013	adenosylhomocysteinase activity	molecular_function	0.54912	1	2	6525	6	24278	1.18219e+17
GO:0016801	hydrolase activity, acting on ether bonds	molecular_function	0.54912	1	2	6525	6	24278	1.18219e+17
GO:0016802	trialkylsulfonium hydrolase activity	molecular_function	0.54912	1	2	6525	6	24278	1.18219e+17
GO:0009056	catabolic process	biological_process	0.54942	1	239	6525	894	24278	118209194,118209728,118232002,118212714,118219375,118216826,118231797,118220608,118223499,118219622,118206747,118233413,118216376,118226210,118207182,118236034,118237514,118229593,118235763,118228916,118214322,118210658,118233598,118223098,118232510,118236711,118236475,118235050,118237154,118230025,118217910,118233483,118221015,118221538,118226857,118228069,118220738,118229604,118209859,118221140…
GO:0030255	protein secretion by the type IV secretion system	biological_process	0.54982	1	1	6525	2	24278	118210361
GO:0044097	secretion by the type IV secretion system	biological_process	0.54982	1	1	6525	2	24278	118210361
GO:0017038	protein import	biological_process	0.55046	1	50	6525	186	24278	118213186,118234730,118217042,118216601,118211126,118213172,118218466,118220913,118233408,118218356,118210553,118223994,118222230,118221087,118211234,118208647,118213722,118237140,118213014,118218069,118211265,118208621,118222869,118217786,118230887,118215164,118211930,118214922,118220871,118212689,118237477,118232940,118218443,118228804,118237514,118235794,118223989,118216376,118220534,118226971…
GO:0005768	endosome	cellular_component	0.55093	1	3	6525	11	24278	1.18208e+26
GO:0010008	endosome membrane	cellular_component	0.55093	1	3	6525	11	24278	1.18208e+26
GO:0044440	endosomal part	cellular_component	0.55093	1	3	6525	11	24278	1.1823e+26
GO:0048583	regulation of response to stimulus	biological_process	0.55123	1	112	6525	397	24278	118235263,118224751,118216888,118236719,118218086,118212222,118210651,118224747,118231779,118233957,118228069,118224909,118214986,118224015,118219974,118216326,118220673,118214094,118222287,118217981,118217672,118212542,118210696,118235426,118220362,118227066,118222218,118216012,118215697,118211383,118222230,118213264,118212235,118227228,118206454,118210610,118231067,118233645,118217143,118214520…
GO:0044163	host cytoskeleton	cellular_component	0.55131	1	2	6525	6	24278	1.18226e+17
GO:0075519	microtubule-dependent intracellular transport of viral material	biological_process	0.55131	1	2	6525	6	24278	1.18226e+17
GO:0075521	microtubule-dependent intracellular transport of viral material towards nucleus	biological_process	0.55131	1	2	6525	6	24278	1.18235e+17
GO:0075606	transport of viral material towards nucleus	biological_process	0.55131	1	2	6525	6	24278	1.18226e+17
GO:0051321	meiotic cell cycle	biological_process	0.55139	1	15	6525	56	24278	1.18225e+134
GO:0015696	ammonium transport	biological_process	0.55147	1	4	6525	14	24278	1.18218e+35
GO:0031023	microtubule organizing center organization	biological_process	0.55185	1	12	6525	45	24278	118214249,118225567,XLOC_265637,118217743,118235354,118230085,118219227,118229533,118229402,118237477,118232940,118231272
GO:0004185	serine-type carboxypeptidase activity	molecular_function	0.55277	1	3	6525	11	24278	1.18208e+26
GO:0005845	mRNA cap binding complex	cellular_component	0.5531	1	4	6525	14	24278	1.18219e+35
GO:0034518	RNA cap binding complex	cellular_component	0.5531	1	4	6525	14	24278	1.18219e+35
GO:0044461	bacterial-type flagellum part	cellular_component	0.55386	1	4	6525	15	24278	1.18207e+35
GO:0022406	membrane docking	biological_process	0.55402	1	13	6525	48	24278	1.18233e+116
GO:0051801	cytolysis in other organism involved in symbiotic interaction	biological_process	0.55409	1	5	6525	18	24278	1.18213e+44
GO:0052331	hemolysis in other organism involved in symbiotic interaction	biological_process	0.55409	1	5	6525	18	24278	1.18216e+44
GO:0009584	detection of visible light	biological_process	0.55424	1	2	6525	6	24278	1.18229e+17
GO:0018298	protein-chromophore linkage	biological_process	0.55424	1	2	6525	6	24278	1.18228e+17
GO:0022804	active transmembrane transporter activity	molecular_function	0.55465	1	78	6525	282	24278	118232585,118219051,118218514,118229472,118219704,118214144,118209633,118209639,118215926,118212580,118235488,118208355,118209635,118224251,118233685,118214908,118225369,118235935,118235489,118209643,118216556,118233766,118227629,118221910,118233381,118226778,118225924,118210930,118226460,118225686,118226890,118214011,118224003,118228864,118219107,118213589,118223388,118211203,118226520,118215332…
GO:0008810	cellulase activity	molecular_function	0.5554	1	2	6525	6	24278	1.1821e+17
GO:0042330	taxis	biological_process	0.55715	1	23	6525	86	24278	118209159,118208864,118213426,118224517,118222295,118217691,118207402,118214284,118236206,118234374,118227124,118214574,118213306,118231094,118208295,118232096,XLOC_265637,118211130,118225636,118223333,118237514,118222281,118216182
GO:0006213	pyrimidine nucleoside metabolic process	biological_process	0.55724	1	5	6525	19	24278	1.1823e+44
GO:0070009	serine-type aminopeptidase activity	molecular_function	0.55773	1	4	6525	15	24278	1.1823e+35
GO:0005126	cytokine receptor binding	molecular_function	0.55925	1	43	6525	171	24278	118229324,118230635,118218421,118222248,118227297,118217223,118224955,118235038,118213681,118235140,118226276,118207682,118212263,118222230,118216231,118223668,118219179,118222167,118234497,118218838,118209937,118217247,118218108,118227298,118219691,118216336,118233140,118230623,118212463,118235447,118213699,118227146,118234251,118225334,118210147,118210158,118220356,118216337,118231219,118221387…
GO:0006230	TMP biosynthetic process	biological_process	0.55929	1	1	6525	2	24278	118218675
GO:0009173	pyrimidine ribonucleoside monophosphate metabolic process	biological_process	0.55929	1	1	6525	2	24278	118218675
GO:0009174	pyrimidine ribonucleoside monophosphate biosynthetic process	biological_process	0.55929	1	1	6525	2	24278	118218675
GO:0046044	TMP metabolic process	biological_process	0.55929	1	1	6525	2	24278	118218675
GO:2000026	regulation of multicellular organismal development	biological_process	0.55955	1	16	6525	56	24278	118223730,118210697,118212446,118209690,118228853,118212222,118223589,118219368,118231328,XLOC_283220,118207245,118231073,118221234,118226103,118223175,118230877
GO:0005875	microtubule associated complex	cellular_component	0.55961	1	13	6525	42	24278	1.18225e+116
GO:0030117	membrane coat	cellular_component	0.56042	1	50	6525	180	24278	118208212,118206445,118225820,118223875,118213675,118218403,118218280,118224780,118212919,118227092,118223073,118216280,118230990,118211674,118227401,118210619,118215477,118221644,118216850,118224666,118211284,118227786,118227621,118224807,118221956,118226778,118210359,118235388,118208184,118214331,118226979,118226824,118211648,118225377,118226489,118220544,118223834,118215697,118224348,118209407…
GO:0048475	coated membrane	cellular_component	0.56042	1	50	6525	180	24278	118218280,118224780,118212919,118227092,118206445,118225820,118213675,118223875,118218403,118208212,118216280,118230990,118223073,118211284,118227786,118216850,118221644,118224666,118215477,118210619,118211674,118227401,118226778,118210359,118224807,118221956,118227621,118226824,118211648,118214331,118208184,118226979,118235388,118226489,118220544,118225377,118209407,118223834,118224348,118215697…
GO:0006542	glutamine biosynthetic process	biological_process	0.56046	1	2	6525	7	24278	1.1821e+17
GO:0030570	pectate lyase activity	molecular_function	0.56059	1	1	6525	2	24278	118211647
GO:0005829	cytosol	cellular_component	0.56097	1	12	6525	46	24278	1.18214e+107
GO:0016071	mRNA metabolic process	biological_process	0.56212	1	94	6525	344	24278	118236022,118210784,118210390,118211998,118232480,118217219,118218356,118216387,118219642,118226760,118227444,118218161,118234107,118212599,118226145,118229394,118227991,118214005,118226857,118222680,118221747,118233358,118217184,118208190,118213038,118206249,118235763,118215775,118226971,118233645,118220418,118211856,118213439,118214520,118223499,118212979,118233172,118233705,118228781,118216189…
GO:0005544	calcium-dependent phospholipid binding	molecular_function	0.56268	1	5	6525	19	24278	1.18212e+44
GO:0010851	cyclase regulator activity	molecular_function	0.56315	1	2	6525	7	24278	1.18208e+17
GO:0010853	cyclase activator activity	molecular_function	0.56315	1	2	6525	7	24278	1.18208e+17
GO:0030249	guanylate cyclase regulator activity	molecular_function	0.56315	1	2	6525	7	24278	1.18212e+17
GO:0030250	guanylate cyclase activator activity	molecular_function	0.56315	1	2	6525	7	24278	1.18208e+17
GO:0006784	heme a biosynthetic process	biological_process	0.56505	1	1	6525	3	24278	118221380
GO:0046160	heme a metabolic process	biological_process	0.56505	1	1	6525	3	24278	118221380
GO:0009166	nucleotide catabolic process	biological_process	0.56518	1	4	6525	14	24278	1.1823e+35
GO:0009605	response to external stimulus	biological_process	0.56604	1	116	6525	429	24278	118215693,118217691,118214143,118213673,118208864,118210280,118214493,118227124,118234374,118213306,118212348,118214284,118234257,118211649,118233377,118233805,XLOC_035840,118207764,118232096,118228092,118220805,118228196,118216047,118226421,118222281,118209327,118226681,118226933,118217932,118231795,118220856,118237298,118228040,XLOC_265637,118223784,118224403,118218425,118210583,118213778,11820…
GO:0008324	cation transmembrane transporter activity	molecular_function	0.56668	1	349	6525	1295	24278	118218443,118225515,118207724,118211196,118217132,118224048,118234358,118219023,118210086,118208037,118227104,118234318,118224805,118221542,118213439,118231272,118231630,118207271,118235007,118233322,118234056,118226832,118219054,118236181,118235572,118209560,118231678,118229275,118211426,118208201,118213219,118219714,118235638,118217019,118208360,118224921,118231508,118210425,118211203,118228772…
GO:0008284	positive regulation of cell proliferation	biological_process	0.56792	1	10	6525	36	24278	1.18209e+89
GO:0003871	5-methyltetrahydropteroyltriglutamate-homocysteine S-methyltransferase activity	molecular_function	0.56861	1	1	6525	3	24278	118236574
GO:0042085	5-methyltetrahydropteroyltri-L-glutamate-dependent methyltransferase activity	molecular_function	0.56861	1	1	6525	3	24278	118236574
GO:0016054	organic acid catabolic process	biological_process	0.56866	1	14	6525	52	24278	1.18219e+125
GO:0046395	carboxylic acid catabolic process	biological_process	0.56866	1	14	6525	52	24278	1.18226e+125
GO:0035303	regulation of dephosphorylation	biological_process	0.56876	1	3	6525	11	24278	1.18211e+26
GO:0035304	regulation of protein dephosphorylation	biological_process	0.56876	1	3	6525	11	24278	1.18233e+26
GO:0000428	DNA-directed RNA polymerase complex	cellular_component	0.56951	1	44	6525	164	24278	118215149,118212937,118210737,118215466,118235992,118233565,118232358,118232106,118232350,118226494,118228003,118228436,118220428,118225135,118233950,118216225,118223483,118222763,118213061,118235219,118236512,118233705,118214144,118230005,118225768,118228377,118215650,118210270,118233871,118214620,118207336,118216117,118208958,118210490,118229252,118232546,118217995,118210872,118222287,118233723…
GO:0030880	RNA polymerase complex	cellular_component	0.56951	1	44	6525	164	24278	118215149,118212937,118235992,118215466,118210737,118232358,118233565,118232350,118232106,118225135,118220428,118228003,118228436,118226494,118223483,118216225,118233950,118236512,118235219,118233705,118213061,118222763,118214144,118230005,118228377,118225768,118214620,118233871,118210270,118215650,118232546,118210490,118208958,118229252,118216117,118207336,118233723,118222287,118210872,118217995…
GO:0055029	nuclear DNA-directed RNA polymerase complex	cellular_component	0.56951	1	44	6525	164	24278	118235219,118236512,118233705,118213061,118222763,118223483,118216225,118233950,118225135,118220428,118228003,118228436,118226494,118232106,118232350,118232358,118233565,118235992,118215466,118210737,118212937,118215149,118207751,118213014,118232937,XLOC_168682,118233723,118222287,118210872,118217995,118232546,118210490,118229252,118208958,118216117,118207336,118214620,118233871,118210270,1182156…
GO:0051648	vesicle localization	biological_process	0.56962	1	2	6525	7	24278	1.1822e+17
GO:0051650	establishment of vesicle localization	biological_process	0.56962	1	2	6525	7	24278	1.18234e+17
GO:0009405	pathogenesis	biological_process	0.57026	1	158	6525	569	24278	118207631,118229875,118213018,118223499,118211033,118207182,118220376,118223989,118224902,118224552,118225868,118223223,118225718,118221368,118210792,118214994,118208012,118231671,118234341,118232153,118206335,118228090,118226207,118217064,118234361,118232162,118223269,118225925,118225066,118227557,118219783,118209558,118212599,118213770,118233592,118223994,118223834,118225000,118234480,118213113…
GO:0016893	endonuclease activity, active with either ribo- or deoxyribonucleic acids and producing 5'-phosphomonoesters	molecular_function	0.57073	1	27	6525	100	24278	118213878,118229458,118214145,118207452,118206610,118229793,118214027,118214836,118210108,118227991,118229593,118219850,118214713,118225570,118226563,118222843,118230731,118222711,118233575,118215290,118225886,118216850,118221644,118227694,118223926,118217132,118234415
GO:0008172	S-methyltransferase activity	molecular_function	0.57132	1	8	6525	30	24278	1.18235e+71
GO:0000015	phosphopyruvate hydratase complex	cellular_component	0.57148	1	3	6525	11	24278	1.18234e+26
GO:0004634	phosphopyruvate hydratase activity	molecular_function	0.57148	1	3	6525	11	24278	1.18234e+26
GO:0022603	regulation of anatomical structure morphogenesis	biological_process	0.57178	1	10	6525	36	24278	1.18208e+89
GO:0031225	anchored component of membrane	cellular_component	0.57247	1	5	6525	17	24278	1.18235e+44
GO:0042126	nitrate metabolic process	biological_process	0.57249	1	3	6525	11	24278	1.18207e+26
GO:0042128	nitrate assimilation	biological_process	0.57249	1	3	6525	11	24278	1.18207e+26
GO:0035306	positive regulation of dephosphorylation	biological_process	0.57296	1	2	6525	7	24278	1.18211e+17
GO:0035307	positive regulation of protein dephosphorylation	biological_process	0.57296	1	2	6525	7	24278	1.18211e+17
GO:0071595	Nem1-Spo7 phosphatase complex	cellular_component	0.57296	1	2	6525	7	24278	1.18234e+17
GO:0040029	regulation of gene expression, epigenetic	biological_process	0.57581	1	5	6525	18	24278	1.18219e+44
GO:0009425	bacterial-type flagellum basal body	cellular_component	0.57585	1	1	6525	3	24278	118233219
GO:0006672	ceramide metabolic process	biological_process	0.57588	1	3	6525	11	24278	1.18226e+26
GO:0030030	cell projection organization	biological_process	0.57598	1	30	6525	110	24278	118231318,118207402,118210639,118208864,118209159,118224517,118225851,118227124,118234374,118236206,118211119,118231094,118212984,118212714,118219650,118235585,118232096,118208976,118220702,118217196,118212517,118221733,118211234,118216182,118222281,118221326,118216422,118225636,118211130,118230279
GO:0071495	cellular response to endogenous stimulus	biological_process	0.5763	1	29	6525	107	24278	118215146,118234410,118213135,118215837,118228462,118229808,118229090,118214820,118211928,118218322,118229431,118235449,118208248,118206509,118207460,118215658,118206929,118230409,118228219,118231565,118233245,118231156,118225501,118227365,118208306,118208312,118211251,118209622,118216433
GO:0009101	glycoprotein biosynthetic process	biological_process	0.57644	1	41	6525	153	24278	118234825,118222861,118215032,118224570,118219803,118237443,118209113,118216489,118219081,118220433,118230472,118230247,118224285,118237498,118214726,118213361,118230580,118217352,118233668,118229477,118232322,118229040,118226264,118210577,118222370,118210074,118214790,118237263,118213700,118217939,118235058,118219982,118207563,118220399,118225686,118225078,118237179,118222571,118231201,118213007…
GO:0000782	telomere cap complex	cellular_component	0.57746	1	1	6525	3	24278	118214480
GO:0000783	nuclear telomere cap complex	cellular_component	0.57746	1	1	6525	3	24278	118214480
GO:0070188	Stn1-Ten1 complex	cellular_component	0.57746	1	1	6525	3	24278	118214480
GO:0003919	FMN adenylyltransferase activity	molecular_function	0.57764	1	1	6525	3	24278	118222937
GO:0016620	oxidoreductase activity, acting on the aldehyde or oxo group of donors, NAD or NADP as acceptor	molecular_function	0.57784	1	9	6525	34	24278	1.18234e+80
GO:0005787	signal peptidase complex	cellular_component	0.5783	1	9	6525	34	24278	1.18224e+80
GO:0006465	signal peptide processing	biological_process	0.5783	1	9	6525	34	24278	1.18214e+80
GO:0042168	heme metabolic process	biological_process	0.57959	1	10	6525	37	24278	1.18223e+89
GO:0006904	vesicle docking involved in exocytosis	biological_process	0.58036	1	11	6525	41	24278	1.18214e+98
GO:0030975	thiamine binding	molecular_function	0.58109	1	3	6525	10	24278	1.18223e+26
GO:0098803	respiratory chain complex	cellular_component	0.58159	1	11	6525	43	24278	1.18231e+98
GO:0030686	90S preribosome	cellular_component	0.58231	1	7	6525	24	24278	XLOC_168682,118212746,118214375,118207213,118214620,118222763,118217995
GO:0009297	pilus assembly	biological_process	0.58294	1	5	6525	18	24278	1.1823e+44
GO:0043711	pilus organization	biological_process	0.58294	1	5	6525	18	24278	1.1823e+44
GO:0006403	RNA localization	biological_process	0.58392	1	22	6525	83	24278	1.18216e+197
GO:0050657	nucleic acid transport	biological_process	0.58392	1	22	6525	83	24278	1.18234e+197
GO:0050658	RNA transport	biological_process	0.58392	1	22	6525	83	24278	1.18219e+197
GO:0051236	establishment of RNA localization	biological_process	0.58392	1	22	6525	83	24278	1.18228e+197
GO:0001514	selenocysteine incorporation	biological_process	0.58543	1	2	6525	7	24278	1.18214e+17
GO:0006451	translational readthrough	biological_process	0.58543	1	2	6525	7	24278	1.18225e+17
GO:0015931	nucleobase-containing compound transport	biological_process	0.58657	1	23	6525	87	24278	1.18216e+206
GO:0033176	proton-transporting V-type ATPase complex	cellular_component	0.5873	1	30	6525	112	24278	118209908,118236754,118237477,118231272,118218443,118219755,118207271,118229280,118219293,118216387,118216538,118222218,118224666,118211284,118234467,118225377,118223881,118230613,118212572,118229275,118231795,118219927,118236667,118214143,118212979,118221432,118214654,118233476,118224780,118228853
GO:0004833	tryptophan 2,3-dioxygenase activity	molecular_function	0.5878	1	1	6525	3	24278	118219121
GO:0000213	tRNA-intron endonuclease activity	molecular_function	0.58795	1	1	6525	3	24278	118218787
GO:0098655	cation transmembrane transport	biological_process	0.58835	1	107	6525	395	24278	118231795,118212117,118214454,118216956,118231833,118224780,118225118,118206984,118206545,118207440,118209286,118233312,118206530,118212922,118227329,118222173,118216538,118223119,118206982,118208407,118221910,118236754,118209908,118210947,118207293,118237477,118216208,118229641,118225924,118226778,118221748,XLOC_090711,118219927,118222237,118236667,118214143,118231027,118216775,118216698,1182214…
GO:1902495	transmembrane transporter complex	cellular_component	0.58893	1	26	6525	97	24278	118213219,118215338,118211426,118209194,118237156,118207440,118229076,118214624,118207143,118216775,118214564,118225515,118219236,118234329,118234714,118212406,118221569,118222173,118212454,118211196,118216728,118223119,118213017,118210595,118214156,118223503
GO:1990351	transporter complex	cellular_component	0.58893	1	26	6525	97	24278	118223503,118210595,118214156,118223119,118216728,118213017,118212454,118211196,118222173,118221569,118234714,118212406,118234329,118219236,118214564,118225515,118216775,118207143,118214624,118229076,118207440,118209194,118237156,118211426,118215338,118213219
GO:0006887	exocytosis	biological_process	0.58907	1	21	6525	78	24278	1.18214e+188
GO:0070887	cellular response to chemical stimulus	biological_process	0.58933	1	33	6525	122	24278	118235449,118229431,118211928,118230376,118229090,118215146,118234410,118216433,118209622,118231156,118218322,118206509,118208248,118214820,118234358,118229808,118215837,118228462,118230380,118213135,118208312,118211251,118227365,118236021,118208306,118225501,118233245,118231565,118206929,118215658,118207460,118228219,118230409
GO:0009725	response to hormone	biological_process	0.58965	1	32	6525	119	24278	118215837,118228462,118229808,118213135,118218322,118208248,118206509,118214820,118231565,118233245,118215658,118207460,118206929,118228219,118230409,118220240,118227365,118208306,118211251,118208312,118218257,118225501,118229090,118215146,118234410,118235449,118229431,118211928,118231156,118209622,118216433,118229931
GO:0016163	nitrogenase activity	molecular_function	0.59069	1	1	6525	3	24278	118216237
GO:0016732	oxidoreductase activity, acting on iron-sulfur proteins as donors, dinitrogen as acceptor	molecular_function	0.59069	1	1	6525	3	24278	118216237
GO:0007016	cytoskeletal anchoring at plasma membrane	biological_process	0.59103	1	7	6525	25	24278	1.18226e+62
GO:0008762	UDP-N-acetylmuramate dehydrogenase activity	molecular_function	0.59111	1	1	6525	2	24278	118217155
GO:0010605	negative regulation of macromolecule metabolic process	biological_process	0.59119	1	48	6525	178	24278	118209794,118217178,118215069,118233168,118234827,118210624,118222349,118209043,118235521,118236733,118212995,118218788,118209641,118210154,118213650,118234757,118234305,118219163,118210970,118211823,118207269,118224997,118218675,118211930,118232599,XLOC_265637,118209440,118214066,118229106,118207956,118226748,118231807,118229054,118219128,118210639,118235285,118218270,118209141,118210155,1182279…
GO:0043207	response to external biotic stimulus	biological_process	0.5913	1	71	6525	260	24278	118220805,118207764,118216047,118214493,118233805,XLOC_035840,118233377,118211649,118234257,118214143,118215693,118210280,118213673,118211026,118220868,118214922,118218425,118210583,118224403,118223784,118220925,118225067,118237298,118228040,118226933,118217932,118226681,118220856,118212235,118222594,118227921,118222873,118226760,118237294,118223994,118221416,118212194,118217201,118213854,1182192…
GO:0051707	response to other organism	biological_process	0.5913	1	71	6525	260	24278	118226681,118226933,118217932,118220856,118228040,118237298,118224403,118223784,118210583,118218425,118225067,118220925,118220868,118211026,118214922,118215693,118214143,118210280,118213673,118214493,118233377,118211649,XLOC_035840,118233805,118234257,118220805,118207764,118216047,118210045,118220534,118227228,118224279,118208098,118233767,118227925,118210697,118230275,118211995,118211168,1182140…
GO:0044431	Golgi apparatus part	cellular_component	0.59133	1	34	6525	127	24278	118213624,118236711,118221538,118226348,118223989,118232075,118228416,118211564,118206747,118211856,118230422,118215602,118216376,118214010,118223073,118212367,118230990,118212966,118215697,118226826,118226277,118235161,118225995,118211389,118219764,118207707,118217044,118213722,118226818,118229181,118213361,118229105,118207519,118231854
GO:0071941	nitrogen cycle metabolic process	biological_process	0.5917	1	6	6525	23	24278	1.18207e+53
GO:0051704	multi-organism process	biological_process	0.59183	1	533	6525	1924	24278	118214720,118212854,118216679,118236512,118227435,118211984,118209873,118222967,118232297,118235743,118227548,118237424,118211907,118215990,118216487,118206714,118233113,118225660,118213715,118220925,118215534,118216267,118208348,118225845,118228308,118213843,118211776,118215693,118214143,118213673,118209975,118214637,118207950,118226801,118216952,118207631,118236452,118232311,118231603,118207083…
GO:0007265	Ras protein signal transduction	biological_process	0.59253	1	42	6525	141	24278	118210610,118219365,118208041,118211301,118224653,118206655,118210532,118212770,118208401,118215735,118216826,118209999,118231065,118207483,118226261,118212589,118230380,118226292,118233650,118230331,118210566,118210651,118231588,118224751,118219089,118212137,118207956,118220673,118233709,118224909,118219974,118228069,118215697,118208358,118221113,118208562,118211360,118217672,118235718,118213264…
GO:0046578	regulation of Ras protein signal transduction	biological_process	0.59253	1	42	6525	141	24278	118217672,118235718,118211360,118208562,118208358,118221113,118215697,118213841,118228082,118213264,118219089,118224751,118231588,118210651,118228069,118219974,118224909,118207956,118220673,118233709,118212137,118226261,118207483,118231065,118210566,118230331,118233650,118226292,118230380,118212589,118219365,118210610,118216826,118208401,118215735,118209999,118206655,118210532,118212770,118224653…
GO:0005811	lipid particle	cellular_component	0.59351	1	4	6525	14	24278	1.18234e+35
GO:0012511	monolayer-surrounded lipid storage body	cellular_component	0.59351	1	4	6525	14	24278	1.18223e+35
GO:0019627	urea metabolic process	biological_process	0.59365	1	1	6525	3	24278	118225836
GO:0007399	nervous system development	biological_process	0.59401	1	17	6525	63	24278	1.18216e+152
GO:0005788	endoplasmic reticulum lumen	cellular_component	0.59478	1	1	6525	3	24278	118234735
GO:0009100	glycoprotein metabolic process	biological_process	0.59524	1	41	6525	154	24278	118230247,118224285,118237498,118214726,118219081,118220433,118230472,118232322,118230580,118213361,118233668,118217352,118229477,118215032,118224570,118219803,118234825,118222861,118216489,118237443,118209113,118222571,118220399,118225686,118225078,118237179,118213007,118231096,118231201,118222370,118210074,118226264,118229040,118210577,118237263,118217939,118213700,118235058,118219982,118207563…
GO:0005744	mitochondrial inner membrane presequence translocase complex	cellular_component	0.59532	1	1	6525	3	24278	118226289
GO:0007586	digestion	biological_process	0.59546	1	6	6525	22	24278	1.18217e+53
GO:0009002	serine-type D-Ala-D-Ala carboxypeptidase activity	molecular_function	0.59558	1	1	6525	3	24278	118208412
GO:0016597	amino acid binding	molecular_function	0.59623	1	7	6525	26	24278	1.18215e+62
GO:0034593	phosphatidylinositol bisphosphate phosphatase activity	molecular_function	0.59646	1	4	6525	15	24278	1.18212e+35
GO:0034596	phosphatidylinositol phosphate 4-phosphatase activity	molecular_function	0.59646	1	4	6525	15	24278	1.18223e+35
GO:0034597	phosphatidylinositol-4,5-bisphosphate 4-phosphatase activity	molecular_function	0.59646	1	4	6525	15	24278	1.18212e+35
GO:0046839	phospholipid dephosphorylation	biological_process	0.59646	1	4	6525	15	24278	1.18212e+35
GO:0046856	phosphatidylinositol dephosphorylation	biological_process	0.59646	1	4	6525	15	24278	1.18212e+35
GO:0052866	phosphatidylinositol phosphate phosphatase activity	molecular_function	0.59646	1	4	6525	15	24278	1.18223e+35
GO:0030414	peptidase inhibitor activity	molecular_function	0.59649	1	50	6525	185	24278	118232162,118216375,118223754,118225783,118214387,118231859,118228330,118223665,118222295,118229840,118213779,118234269,118222850,118219675,118230215,118225265,118206513,118235168,118221640,118215768,118218719,118219571,118224216,118210190,118220362,118225609,118225553,118223011,118226140,118219562,118207177,118234248,118229791,118207914,118208391,118219163,118206983,118229228,118217779,118207472…
GO:0061134	peptidase regulator activity	molecular_function	0.59649	1	50	6525	185	24278	118209063,118207472,118211651,118233852,118215141,118224543,118230454,118212523,118208234,118229634,118232187,118219562,118229791,118234248,118207177,118207914,118219163,118208391,118206983,118229228,118217779,118222850,118235168,118206513,118230215,118219675,118225265,118215768,118221640,118219571,118218719,118224216,118210190,118220362,118225553,118225609,118223011,118226140,118232162,118216375…
GO:0009274	peptidoglycan-based cell wall	cellular_component	0.59716	1	2	6525	7	24278	1.18211e+17
GO:0009276	Gram-negative-bacterium-type cell wall	cellular_component	0.59716	1	2	6525	7	24278	1.18219e+17
GO:0051297	centrosome organization	biological_process	0.5973	1	2	6525	7	24278	XLOC_265637,118217743
GO:0000012	single strand break repair	biological_process	0.59768	1	2	6525	7	24278	1.18236e+17
GO:0019605	butyrate metabolic process	biological_process	0.59836	1	1	6525	3	24278	118213928
GO:0046459	short-chain fatty acid metabolic process	biological_process	0.59836	1	1	6525	3	24278	118213928
GO:0047989	hydroxybutyrate-dimer hydrolase activity	molecular_function	0.59836	1	1	6525	3	24278	118213928
GO:0051056	regulation of small GTPase mediated signal transduction	biological_process	0.59862	1	48	6525	161	24278	118228082,118213264,118213841,118215697,118212542,118217672,118217981,118235718,118211360,118208562,118208358,118221113,118220673,118207956,118233709,118222287,118212137,118228069,118219974,118224909,118231588,118210651,118219089,118224751,118230380,118212589,118210566,118230331,118233650,118226292,118207483,118231065,118230275,118226261,118207422,118210532,118212770,118206655,118211106,118224653…
GO:0000774	adenyl-nucleotide exchange factor activity	molecular_function	0.59875	1	7	6525	27	24278	1.18227e+62
GO:0006721	terpenoid metabolic process	biological_process	0.59899	1	12	6525	45	24278	1.18207e+107
GO:0016114	terpenoid biosynthetic process	biological_process	0.59899	1	12	6525	45	24278	1.18235e+107
GO:0009015	N-succinylarginine dihydrolase activity	molecular_function	0.59987	1	1	6525	3	24278	118216621
GO:0004615	phosphomannomutase activity	molecular_function	0.6	1	1	6525	3	24278	118220184
GO:0009226	nucleotide-sugar biosynthetic process	biological_process	0.6	1	1	6525	3	24278	118220184
GO:0009298	GDP-mannose biosynthetic process	biological_process	0.6	1	1	6525	3	24278	118220184
GO:0019673	GDP-mannose metabolic process	biological_process	0.6	1	1	6525	3	24278	118220184
GO:0008191	metalloendopeptidase inhibitor activity	molecular_function	0.60055	1	4	6525	15	24278	1.18218e+35
GO:0010576	metalloenzyme regulator activity	molecular_function	0.60055	1	4	6525	15	24278	1.18225e+35
GO:0048551	metalloenzyme inhibitor activity	molecular_function	0.60055	1	4	6525	15	24278	1.18218e+35
GO:0051050	positive regulation of transport	biological_process	0.60087	1	4	6525	15	24278	1.18227e+35
GO:0030599	pectinesterase activity	molecular_function	0.60101	1	2	6525	6	24278	1.1823e+17
GO:0042545	cell wall modification	biological_process	0.60101	1	2	6525	6	24278	1.1823e+17
GO:0000155	phosphorelay sensor kinase activity	molecular_function	0.60107	1	12	6525	44	24278	1.18236e+107
GO:0000049	tRNA binding	molecular_function	0.60173	1	7	6525	27	24278	1.1822e+62
GO:0031400	negative regulation of protein modification process	biological_process	0.60178	1	11	6525	42	24278	118207956,118233168,118234827,118224997,118214066,118209043,XLOC_265637,118225128,118211930,118212857,118234305
GO:0006047	UDP-N-acetylglucosamine metabolic process	biological_process	0.60342	1	1	6525	3	24278	118231256
GO:0007409	axonogenesis	biological_process	0.60344	1	11	6525	42	24278	1.18231e+98
GO:0007411	axon guidance	biological_process	0.60344	1	11	6525	42	24278	1.18232e+98
GO:0048667	cell morphogenesis involved in neuron differentiation	biological_process	0.60344	1	11	6525	42	24278	1.18211e+98
GO:0048812	neuron projection morphogenesis	biological_process	0.60344	1	11	6525	42	24278	1.18209e+98
GO:0061564	axon development	biological_process	0.60344	1	11	6525	42	24278	1.18227e+98
GO:0097485	neuron projection guidance	biological_process	0.60344	1	11	6525	42	24278	1.18232e+98
GO:0008203	cholesterol metabolic process	biological_process	0.60353	1	3	6525	11	24278	1.18236e+26
GO:1902652	secondary alcohol metabolic process	biological_process	0.60353	1	3	6525	11	24278	1.18236e+26
GO:1901618	organic hydroxy compound transmembrane transporter activity	molecular_function	0.60384	1	1	6525	3	24278	118219023
GO:0034457	Mpp10 complex	cellular_component	0.60424	1	6	6525	21	24278	118222763,118217995,118214375,118212746,118214620,XLOC_168682
GO:0006414	translational elongation	biological_process	0.6043	1	7	6525	27	24278	1.18225e+62
GO:0018130	heterocycle biosynthetic process	biological_process	0.6057	1	1013	6525	3738	24278	118206714,118216799,118232581,118213715,118233775,118217787,118236371,118228301,118232297,118221748,118228386,118213071,118232878,118207527,118211351,118222967,118211251,118218064,118223597,118234973,118216679,118236512,118212117,118216615,118233245,118225215,118213238,118213339,118210325,118234331,118228003,118225596,118217178,118224733,118235385,118227205,118229553,118210090,118206914,118222779…
GO:0044179	hemolysis in other organism	biological_process	0.606	1	5	6525	19	24278	1.18213e+44
GO:0051715	cytolysis in other organism	biological_process	0.606	1	5	6525	19	24278	1.18216e+44
GO:0006979	response to oxidative stress	biological_process	0.6063	1	11	6525	41	24278	1.18217e+98
GO:0071840	cellular component organization or biogenesis	biological_process	0.60677	1	761	6525	2792	24278	118215927,118220849,118217309,118215332,118210965,118226729,118221690,118214010,118221635,118220399,118235362,118224491,118213601,118232472,118221910,118226025,118231789,118227773,118223503,118222173,118210871,118206265,118219217,118233039,118207114,118219390,118223884,118224251,118218069,118232177,118222487,118206523,118233577,118225536,118221346,118207355,118226765,118235533,118225604,118216933…
GO:0004161	dimethylallyltranstransferase activity	molecular_function	0.6068	1	2	6525	7	24278	1.18233e+17
GO:0009772	photosynthetic electron transport in photosystem II	biological_process	0.60702	1	3	6525	10	24278	1.18236e+26
GO:0033646	host intracellular part	cellular_component	0.60843	1	47	6525	171	24278	118236711,118223784,118211995,118221727,118236371,118226944,118215534,118235890,118222289,118224221,118214021,118208657,118215029,118211880,118234817,118232163,118227672,118207482,118210433,118221690,118225584,118227878,118235385,118224216,118229179,118210769,118235336,118213172,118231414,118237063,118216416,118214637,118219051,118231588,118235285,118212900,118226431,118219089,118227991,118207489…
GO:0043656	intracellular region of host	cellular_component	0.60843	1	47	6525	171	24278	118211880,118208657,118215029,118235890,118222289,118214021,118224221,118226944,118215534,118236711,118236371,118211995,118223784,118221727,118225584,118221690,118227878,118227672,118207482,118210433,118234817,118232163,118216416,118237063,118219051,118214637,118224216,118235385,118210769,118235336,118213172,118231414,118229179,118208621,118236425,118219555,118229961,118235389,118232357,118216641…
GO:0016796	exonuclease activity, active with either ribo- or deoxyribonucleic acids and producing 5'-phosphomonoesters	molecular_function	0.6086	1	68	6525	260	24278	118234730,118210390,118225477,118228817,118214249,118232480,118234363,118226756,118221156,118219041,118227991,118225482,118234304,118234592,118226857,118229481,118234358,118211258,118234294,118232064,118219150,118229992,118237514,118228956,118223989,118220697,118216376,118226044,118220608,118212979,118233705,118216189,118219375,118234669,118237149,118225475,118207764,118227846,118221154,118225128…
GO:0016514	SWI/SNF complex	cellular_component	0.60895	1	1	6525	3	24278	118232177
GO:0016586	RSC complex	cellular_component	0.60895	1	1	6525	3	24278	118232177
GO:0043015	gamma-tubulin binding	molecular_function	0.60896	1	2	6525	7	24278	1.18227e+17
GO:0045321	leukocyte activation	biological_process	0.60935	1	3	6525	11	24278	1.18222e+26
GO:0004356	glutamate-ammonia ligase activity	molecular_function	0.60943	1	4	6525	15	24278	1.1821e+35
GO:0016211	ammonia ligase activity	molecular_function	0.60943	1	4	6525	15	24278	1.18218e+35
GO:0016880	acid-ammonia (or amide) ligase activity	molecular_function	0.60943	1	4	6525	15	24278	1.18213e+35
GO:0030337	DNA polymerase processivity factor activity	molecular_function	0.6098	1	10	6525	37	24278	1.18236e+89
GO:0015662	ATPase activity, coupled to transmembrane movement of ions, phosphorylative mechanism	molecular_function	0.61098	1	3	6525	10	24278	1.18208e+26
GO:0006282	regulation of DNA repair	biological_process	0.61117	1	1	6525	3	24278	118217586
GO:0080135	regulation of cellular response to stress	biological_process	0.61117	1	1	6525	3	24278	118217586
GO:2001020	regulation of response to DNA damage stimulus	biological_process	0.61117	1	1	6525	3	24278	118217586
GO:0019354	siroheme biosynthetic process	biological_process	0.61165	1	5	6525	18	24278	1.18228e+44
GO:0043115	precorrin-2 dehydrogenase activity	molecular_function	0.61165	1	5	6525	18	24278	1.18215e+44
GO:0046156	siroheme metabolic process	biological_process	0.61165	1	5	6525	18	24278	1.18208e+44
GO:0004140	dephospho-CoA kinase activity	molecular_function	0.61178	1	3	6525	11	24278	1.18211e+26
GO:0016624	oxidoreductase activity, acting on the aldehyde or oxo group of donors, disulfide as acceptor	molecular_function	0.61241	1	3	6525	11	24278	1.18207e+26
GO:0004190	aspartic-type endopeptidase activity	molecular_function	0.61442	1	48	6525	180	24278	118219654,118210532,118235877,118228397,118216225,118228815,118213439,118222763,118210187,118206211,118211123,118222912,118230348,118218924,118207472,118231744,118231508,118210737,118222785,118236355,118219839,118234358,118227329,118226248,118236449,118234483,118210527,118237161,118225767,118228841,118230887,118212984,XLOC_168682,118232937,118219157,118212382,118210762,118232566,118231506,1182103…
GO:0070001	aspartic-type peptidase activity	molecular_function	0.61442	1	48	6525	180	24278	118228397,118216225,118222763,118213439,118210187,118228815,118230348,118222912,118218924,118211123,118206211,118219654,118210532,118235877,118210737,118231508,118231744,118236355,118222785,118234358,118219839,118226248,118227329,118207472,XLOC_168682,118232937,118219157,118212382,118232566,118210762,118234483,118237161,118210527,118236449,118225767,118228841,118230887,118212984,118234467,1182361…
GO:0003747	translation release factor activity	molecular_function	0.61463	1	6	6525	24	24278	1.18233e+53
GO:0008079	translation termination factor activity	molecular_function	0.61463	1	6	6525	24	24278	1.18207e+53
GO:0019015	viral genome	cellular_component	0.6148	1	2	6525	7	24278	1.18228e+17
GO:0019203	carbohydrate phosphatase activity	molecular_function	0.61563	1	2	6525	7	24278	1.18221e+17
GO:0050308	sugar-phosphatase activity	molecular_function	0.61563	1	2	6525	7	24278	1.18221e+17
GO:0098542	defense response to other organism	biological_process	0.61569	1	56	6525	206	24278	118213673,118210280,118222691,118214143,118234257,118230613,118233805,118211649,118233377,118221407,118223579,118210784,118233210,118213854,118219233,118207764,118223994,118221416,118220805,118217201,118212194,118226760,118227921,118222873,118212235,118224279,118227228,118220856,118220534,118210045,118217932,118226681,118237298,118228040,118227925,118210697,118233767,118220925,118224956,118225067…
GO:0042393	histone binding	molecular_function	0.61577	1	6	6525	23	24278	1.18223e+53
GO:0017006	protein-tetrapyrrole linkage	biological_process	0.61626	1	1	6525	3	24278	118231256
GO:0016556	mRNA modification	biological_process	0.61678	1	1	6525	3	24278	118229875
GO:0080009	mRNA methylation	biological_process	0.61678	1	1	6525	3	24278	118229875
GO:1901362	organic cyclic compound biosynthetic process	biological_process	0.61723	1	1024	6525	3784	24278	118233705,118223472,118229249,118234504,118233645,118227365,118214306,118208098,118234885,118226411,118211268,118229106,118233894,118209622,118218340,118225797,118226748,118222869,118235572,118221380,118212668,118211269,118229977,118216255,118215146,118211653,118221282,118228050,118207970,118233258,118217258,118237552,118210583,118209917,118233214,118218931,118222555,118218675,118228043,118207544…
GO:0031175	neuron projection development	biological_process	0.61745	1	15	6525	56	24278	1.18207e+134
GO:0048666	neuron development	biological_process	0.61745	1	15	6525	56	24278	1.18216e+134
GO:0006555	methionine metabolic process	biological_process	0.61751	1	3	6525	11	24278	1.18214e+26
GO:0007289	spermatid nucleus differentiation	biological_process	0.61777	1	2	6525	7	24278	1.18217e+17
GO:0035092	sperm chromatin condensation	biological_process	0.61777	1	2	6525	7	24278	1.18217e+17
GO:0044445	cytosolic part	cellular_component	0.61869	1	11	6525	44	24278	1.18214e+98
GO:0019089	transmission of virus	biological_process	0.61898	1	5	6525	19	24278	1.18212e+44
GO:0044007	dissemination or transmission of symbiont from host	biological_process	0.61898	1	5	6525	19	24278	1.18221e+44
GO:0051821	dissemination or transmission of organism from other organism involved in symbiotic interaction	biological_process	0.61898	1	5	6525	19	24278	1.18206e+44
GO:0016073	snRNA metabolic process	biological_process	0.61992	1	1	6525	3	24278	118232922
GO:0016180	snRNA processing	biological_process	0.61992	1	1	6525	3	24278	118232922
GO:0034472	snRNA 3'-end processing	biological_process	0.61992	1	1	6525	3	24278	118232922
GO:0034477	U6 snRNA 3'-end processing	biological_process	0.61992	1	1	6525	3	24278	118232922
GO:0043628	ncRNA 3'-end processing	biological_process	0.61992	1	1	6525	3	24278	118232922
GO:0000124	SAGA complex	cellular_component	0.61992	1	1	6525	3	24278	118232280
GO:0051656	establishment of organelle localization	biological_process	0.62028	1	4	6525	15	24278	1.1821e+35
GO:0030182	neuron differentiation	biological_process	0.62057	1	16	6525	60	24278	1.18236e+143
GO:0048699	generation of neurons	biological_process	0.62057	1	16	6525	60	24278	1.18236e+143
GO:0044441	ciliary part	cellular_component	0.62063	1	2	6525	7	24278	1.18236e+17
GO:0051817	modification of morphology or physiology of other organism involved in symbiotic interaction	biological_process	0.62068	1	38	6525	142	24278	118221661,118232361,118235763,118207704,118215534,118224011,118233113,118211995,118223784,118224403,118234294,118216487,118234858,118222757,118208327,118232311,118236611,118225193,118232642,118227365,118227228,118206423,118230508,118223723,118235703,118231010,118212235,118215240,118206253,118233054,118213341,118219767,118216434,118219385,118214493,118216267,118234490,118235285
GO:0016625	oxidoreductase activity, acting on the aldehyde or oxo group of donors, iron-sulfur protein as acceptor	molecular_function	0.62077	1	1	6525	3	24278	118236021
GO:0009288	bacterial-type flagellum	cellular_component	0.62123	1	16	6525	63	24278	118217032,118221152,118206759,118213306,118226971,118225992,118217691,118233219,118223333,118228406,118237514,118219179,118213036,118210784,XLOC_265637,118221154
GO:0008927	mannonate dehydratase activity	molecular_function	0.62153	1	1	6525	3	24278	118214470
GO:0005727	extrachromosomal circular DNA	cellular_component	0.62247	1	3	6525	11	24278	1.18214e+26
GO:0046821	extrachromosomal DNA	cellular_component	0.62247	1	3	6525	11	24278	1.18214e+26
GO:1901292	nucleoside phosphate catabolic process	biological_process	0.62273	1	4	6525	15	24278	1.18207e+35
GO:0034505	tooth mineralization	biological_process	0.62462	1	1	6525	3	24278	118212446
GO:0042481	regulation of odontogenesis	biological_process	0.62462	1	1	6525	3	24278	118212446
GO:0042482	positive regulation of odontogenesis	biological_process	0.62462	1	1	6525	3	24278	118212446
GO:0042487	regulation of odontogenesis of dentin-containing tooth	biological_process	0.62462	1	1	6525	3	24278	118212446
GO:0042488	positive regulation of odontogenesis of dentin-containing tooth	biological_process	0.62462	1	1	6525	3	24278	118212446
GO:0070166	enamel mineralization	biological_process	0.62462	1	1	6525	3	24278	118212446
GO:0070169	positive regulation of biomineral tissue development	biological_process	0.62462	1	1	6525	3	24278	118212446
GO:0070170	regulation of tooth mineralization	biological_process	0.62462	1	1	6525	3	24278	118212446
GO:0070172	positive regulation of tooth mineralization	biological_process	0.62462	1	1	6525	3	24278	118212446
GO:0070173	regulation of enamel mineralization	biological_process	0.62462	1	1	6525	3	24278	118212446
GO:0070175	positive regulation of enamel mineralization	biological_process	0.62462	1	1	6525	3	24278	118212446
GO:0097186	amelogenesis	biological_process	0.62462	1	1	6525	3	24278	118212446
GO:2000027	regulation of organ morphogenesis	biological_process	0.62462	1	1	6525	3	24278	118212446
GO:0009890	negative regulation of biosynthetic process	biological_process	0.6252	1	30	6525	112	24278	118206979,118207269,118218675,118210658,118210970,118211823,118215181,118229106,118222525,118232599,118231807,118229054,118215069,118217178,118226748,118210155,118227991,118213650,118210154,118218788,118209141,118209641,118231347,118234757,118219128,118210639,118222349,118212995,118236733,118235521
GO:1902533	positive regulation of intracellular signal transduction	biological_process	0.62542	1	11	6525	43	24278	1.18212e+98
GO:0035435	phosphate ion transmembrane transport	biological_process	0.62543	1	1	6525	3	24278	118225288
GO:0098661	inorganic anion transmembrane transport	biological_process	0.62543	1	1	6525	3	24278	118225288
GO:0009424	bacterial-type flagellum hook	cellular_component	0.62653	1	3	6525	12	24278	1.18226e+26
GO:0004519	endonuclease activity	molecular_function	0.62698	1	48	6525	181	24278	118222711,118236281,118218787,118225886,118227694,118214643,118223926,118230731,118232528,118218944,118214713,118227944,118225570,118222522,118225959,118236574,118235533,118237459,118218816,118221214,118218789,118227991,118214078,118214027,118229793,118214836,118214145,118233575,118215290,118216850,118221644,118214568,118217132,118234415,118226563,118222843,118229593,118219850,118232472,118206305…
GO:0006848	pyruvate transport	biological_process	0.62776	1	3	6525	11	24278	1.18222e+26
GO:0006850	mitochondrial pyruvate transport	biological_process	0.62776	1	3	6525	11	24278	1.18207e+26
GO:0071310	cellular response to organic substance	biological_process	0.62798	1	30	6525	113	24278	118229090,118215837,118228462,118229808,118234410,118213135,118215146,118208248,118206509,118218322,118229431,118235449,118211928,118214820,118231156,118231565,118233245,118230409,118228219,118207460,118215658,118206929,118209622,118216433,118227365,118208306,118236021,118208312,118211251,118225501
GO:0019050	suppression by virus of host apoptotic process	biological_process	0.62814	1	3	6525	11	24278	1.18215e+26
GO:0033668	negative regulation by symbiont of host apoptotic process	biological_process	0.62814	1	3	6525	11	24278	1.18215e+26
GO:0052041	negative regulation by symbiont of host programmed cell death	biological_process	0.62814	1	3	6525	11	24278	1.18216e+26
GO:0052490	negative regulation by organism of programmed cell death in other organism involved in symbiotic interaction	biological_process	0.62814	1	3	6525	11	24278	1.18216e+26
GO:0000724	double-strand break repair via homologous recombination	biological_process	0.62819	1	2	6525	7	24278	1.18209e+17
GO:0004714	transmembrane receptor protein tyrosine kinase activity	molecular_function	0.62825	1	6	6525	21	24278	1.18207e+53
GO:0016824	hydrolase activity, acting on acid halide bonds	molecular_function	0.6286	1	1	6525	3	24278	118231395
GO:0019120	hydrolase activity, acting on acid halide bonds, in C-halide compounds	molecular_function	0.6286	1	1	6525	3	24278	118231395
GO:0031589	cell-substrate adhesion	biological_process	0.62864	1	4	6525	15	24278	1.18218e+35
GO:0042158	lipoprotein biosynthetic process	biological_process	0.62984	1	18	6525	68	24278	1.18208e+161
GO:0019201	nucleotide kinase activity	molecular_function	0.63039	1	24	6525	91	24278	1.18227e+215
GO:0004363	glutathione synthase activity	molecular_function	0.63105	1	2	6525	7	24278	1.18216e+17
GO:0042887	amide transmembrane transporter activity	molecular_function	0.63138	1	4	6525	15	24278	1.18232e+35
GO:0000229	cytoplasmic chromosome	cellular_component	0.63151	1	1	6525	3	24278	118232097
GO:0000262	mitochondrial chromosome	cellular_component	0.63151	1	1	6525	3	24278	118232097
GO:0042645	mitochondrial nucleoid	cellular_component	0.63151	1	1	6525	3	24278	118232097
GO:0000098	sulfur amino acid catabolic process	biological_process	0.63152	1	1	6525	3	24278	118234952
GO:0030328	prenylcysteine catabolic process	biological_process	0.63152	1	1	6525	3	24278	118234952
GO:0030329	prenylcysteine metabolic process	biological_process	0.63152	1	1	6525	3	24278	118234952
GO:0042219	cellular modified amino acid catabolic process	biological_process	0.63152	1	1	6525	3	24278	118234952
GO:0044273	sulfur compound catabolic process	biological_process	0.63152	1	1	6525	3	24278	118234952
GO:0060966	regulation of gene silencing by RNA	biological_process	0.63186	1	1	6525	3	24278	118235285
GO:0060967	negative regulation of gene silencing by RNA	biological_process	0.63186	1	1	6525	3	24278	118235285
GO:0060968	regulation of gene silencing	biological_process	0.63186	1	1	6525	3	24278	118235285
GO:0060969	negative regulation of gene silencing	biological_process	0.63186	1	1	6525	3	24278	118235285
GO:0046834	lipid phosphorylation	biological_process	0.63257	1	4	6525	16	24278	1.18213e+35
GO:0046854	phosphatidylinositol phosphorylation	biological_process	0.63257	1	4	6525	16	24278	1.18213e+35
GO:0002200	somatic diversification of immune receptors	biological_process	0.63257	1	1	6525	3	24278	118214994
GO:0002562	somatic diversification of immune receptors via germline recombination within a single locus	biological_process	0.63257	1	1	6525	3	24278	118214994
GO:0016444	somatic cell DNA recombination	biological_process	0.63257	1	1	6525	3	24278	118214994
GO:0033151	V(D)J recombination	biological_process	0.63257	1	1	6525	3	24278	118214994
GO:0042886	amide transport	biological_process	0.63265	1	6	6525	23	24278	1.18219e+53
GO:0051607	defense response to virus	biological_process	0.63315	1	18	6525	70	24278	1.18227e+161
GO:0000070	mitotic sister chromatid segregation	biological_process	0.63454	1	11	6525	44	24278	118207956,118225058,118212857,118222785,118213014,118213756,XLOC_265637,118214066,118211930,118233172,118225128
GO:0000819	sister chromatid segregation	biological_process	0.63454	1	11	6525	44	24278	118213014,118222785,118213756,118212857,118233172,118211930,118225128,XLOC_265637,118214066,118207956,118225058
GO:0003852	2-isopropylmalate synthase activity	molecular_function	0.63551	1	1	6525	3	24278	118232948
GO:0006274	DNA replication termination	biological_process	0.63563	1	1	6525	3	24278	118217217
GO:0046149	pigment catabolic process	biological_process	0.63576	1	5	6525	19	24278	1.18229e+44
GO:0005685	U1 snRNP	cellular_component	0.63601	1	4	6525	15	24278	1.18228e+35
GO:0006376	mRNA splice site selection	biological_process	0.63601	1	4	6525	15	24278	1.18216e+35
GO:0030532	small nuclear ribonucleoprotein complex	cellular_component	0.63601	1	4	6525	15	24278	1.18231e+35
GO:0097525	spliceosomal snRNP complex	cellular_component	0.63601	1	4	6525	15	24278	1.18216e+35
GO:0006401	RNA catabolic process	biological_process	0.6365	1	14	6525	53	24278	1.18221e+125
GO:0006402	mRNA catabolic process	biological_process	0.6365	1	14	6525	53	24278	1.18216e+125
GO:0051262	protein tetramerization	biological_process	0.63663	1	9	6525	32	24278	1.18207e+80
GO:0006276	plasmid maintenance	biological_process	0.63672	1	3	6525	11	24278	1.18209e+26
GO:0016604	nuclear body	cellular_component	0.63754	1	2	6525	7	24278	1.18223e+17
GO:0016607	nuclear speck	cellular_component	0.63754	1	2	6525	7	24278	1.1821e+17
GO:0017025	TBP-class protein binding	molecular_function	0.63908	1	3	6525	12	24278	1.18209e+26
GO:0016568	chromatin modification	biological_process	0.63989	1	23	6525	85	24278	118215149,118224841,118207206,118230005,118234467,118233871,118214620,118234483,118229252,118232106,118229127,118217995,118222287,XLOC_168682,118233950,118223483,118213014,118206947,118216722,118223458,118232177,118208326,118236512
GO:0010393	galacturonan metabolic process	biological_process	0.63994	1	2	6525	7	24278	1.18229e+17
GO:0045488	pectin metabolic process	biological_process	0.63994	1	2	6525	7	24278	1.18229e+17
GO:0045490	pectin catabolic process	biological_process	0.63994	1	2	6525	7	24278	1.18224e+17
GO:0048598	embryonic morphogenesis	biological_process	0.64005	1	1	6525	3	24278	118230591
GO:0072669	tRNA-splicing ligase complex	cellular_component	0.64005	1	1	6525	3	24278	118230591
GO:0007249	I-kappaB kinase/NF-kappaB signaling	biological_process	0.64026	1	4	6525	15	24278	1.18221e+35
GO:0043122	regulation of I-kappaB kinase/NF-kappaB signaling	biological_process	0.64026	1	4	6525	15	24278	1.18224e+35
GO:0043123	positive regulation of I-kappaB kinase/NF-kappaB signaling	biological_process	0.64026	1	4	6525	15	24278	1.18223e+35
GO:0004174	electron-transferring-flavoprotein dehydrogenase activity	molecular_function	0.64052	1	2	6525	7	24278	1.18226e+17
GO:0016649	oxidoreductase activity, acting on the CH-NH group of donors, quinone or similar compound as acceptor	molecular_function	0.64052	1	2	6525	7	24278	1.18226e+17
GO:0003917	DNA topoisomerase type I activity	molecular_function	0.64058	1	3	6525	12	24278	1.18227e+26
GO:0014070	response to organic cyclic compound	biological_process	0.64071	1	27	6525	102	24278	118206929,118215658,118230409,118206984,118233245,118231565,118210338,118235572,118211251,118208312,118208306,118227365,118227071,118216433,118209622,118215146,118234410,118213135,118229808,118228462,118229090,118214820,118211928,118218322,118206982,118206509,118208248
GO:0009579	thylakoid	cellular_component	0.64085	1	52	6525	191	24278	118226557,118210779,118217999,118216050,118206572,118237444,118222287,118214493,118229021,118230406,118216086,118226004,118230533,118210347,118220431,118233430,118219755,118234423,118233969,118206174,118220888,118215683,118221650,118214258,118215943,118210491,118234689,118222174,118213854,118207215,118214700,118230060,118220979,118217722,118216225,118225740,118209059,118230592,118218444,118222986…
GO:0044436	thylakoid part	cellular_component	0.64085	1	52	6525	191	24278	118214700,118207215,118213854,118222174,118215943,118210491,118234689,118214258,118221650,118215683,118220888,118206174,118233969,118219755,118234423,118233430,118220431,118210347,118230533,118226004,118216086,118230406,118214493,118229021,118222287,118237444,118206572,118216050,118217999,118210779,118226557,118208842,118220845,118213022,118234867,118208359,118209706,118208900,118220877,118228098…
GO:0006384	transcription initiation from RNA polymerase III promoter	biological_process	0.64096	1	1	6525	3	24278	118226887
GO:0019048	modulation by virus of host morphology or physiology	biological_process	0.64129	1	33	6525	124	24278	118206253,118233054,118223723,118231010,118235703,118212235,118215240,118234490,118235285,118219767,118219385,118216434,118214493,118215534,118233113,118224011,118234294,118223784,118211995,118224403,118234858,118221661,118235763,118232361,118207704,118227365,118227228,118206423,118222757,118208327,118232311,118236611,118225193
GO:0003989	acetyl-CoA carboxylase activity	molecular_function	0.64186	1	2	6525	7	24278	1.18221e+17
GO:0016421	CoA carboxylase activity	molecular_function	0.64186	1	2	6525	7	24278	1.18221e+17
GO:0016885	ligase activity, forming carbon-carbon bonds	molecular_function	0.64186	1	2	6525	7	24278	1.18221e+17
GO:0009073	aromatic amino acid family biosynthetic process	biological_process	0.64204	1	2	6525	8	24278	1.18231e+17
GO:0018537	coenzyme F420-dependent N5,N10-methenyltetrahydromethanopterin reductase activity	molecular_function	0.64213	1	1	6525	3	24278	118209804
GO:0046995	oxidoreductase activity, acting on hydrogen as donor, with other known acceptors	molecular_function	0.64213	1	1	6525	3	24278	118209804
GO:0047068	N5,N10-methenyltetrahydromethanopterin hydrogenase activity	molecular_function	0.64213	1	1	6525	3	24278	118209804
GO:0008855	exodeoxyribonuclease VII activity	molecular_function	0.64228	1	58	6525	225	24278	118237477,118229992,118208177,118232064,118219150,118217884,118223989,118220697,118217217,118227449,118228956,118237514,118229481,118226103,118207804,118234294,118234358,118213624,118211258,118219375,118212922,118225475,118237149,118234669,118226044,118216376,118231795,118212979,118220608,118234363,118225984,118208375,118219053,118229550,118225477,118228817,118234730,118227846,118221154,118225128…
GO:0006515	misfolded or incompletely synthesized protein catabolic process	biological_process	0.64403	1	1	6525	3	24278	118236021
GO:0031144	proteasome localization	biological_process	0.64403	1	1	6525	3	24278	118236021
GO:0031503	protein complex localization	biological_process	0.64403	1	1	6525	3	24278	118236021
GO:0034629	cellular protein complex localization	biological_process	0.64403	1	1	6525	3	24278	118236021
GO:0035966	response to topologically incorrect protein	biological_process	0.64403	1	1	6525	3	24278	118236021
GO:0035967	cellular response to topologically incorrect protein	biological_process	0.64403	1	1	6525	3	24278	118236021
GO:0051788	response to misfolded protein	biological_process	0.64403	1	1	6525	3	24278	118236021
GO:0071218	cellular response to misfolded protein	biological_process	0.64403	1	1	6525	3	24278	118236021
GO:0071630	nucleus-associated proteasomal ubiquitin-dependent protein catabolic process	biological_process	0.64403	1	1	6525	3	24278	118236021
GO:0010883	regulation of lipid storage	biological_process	0.64446	1	7	6525	26	24278	1.18229e+62
GO:0010884	positive regulation of lipid storage	biological_process	0.64446	1	7	6525	26	24278	1.18211e+62
GO:0015630	microtubule cytoskeleton	cellular_component	0.64517	1	67	6525	248	24278	118209851,118224973,118212922,118225468,118225887,118223905,118237477,118208557,118225567,XLOC_265637,118213355,118213624,118226103,118209172,118211499,118216851,118220544,118218299,118235843,118235328,118223276,118229265,118236446,118224160,118207830,118225561,118210647,118234232,118213725,118208976,118209930,118213211,118230085,118222786,118209690,118219227,118236186,118211817,118236733,1182118…
GO:0019049	evasion or tolerance of host defenses by virus	biological_process	0.64521	1	6	6525	23	24278	1.18227e+53
GO:0044433	cytoplasmic vesicle part	cellular_component	0.64523	1	28	6525	105	24278	118235447,118229862,118206820,118230990,118216280,118223073,118230202,118236639,118227092,118208184,118223875,118235388,118210359,118226778,118221933,118211947,118208847,118224234,118215146,118235866,118208238,118226277,118223525,118221644,118215477,118210619,118224348,118215697
GO:0022008	neurogenesis	biological_process	0.6471	1	16	6525	61	24278	1.18227e+143
GO:0048278	vesicle docking	biological_process	0.64885	1	11	6525	43	24278	1.18219e+98
GO:0006553	lysine metabolic process	biological_process	0.6493	1	3	6525	11	24278	1.18215e+26
GO:0006259	DNA metabolic process	biological_process	0.65076	1	384	6525	1435	24278	118207313,118210315,118208375,118226011,118223137,118233853,118224240,118206328,118216292,118235024,118233699,118226086,118211342,118230055,118210872,118225076,118218789,118219089,XLOC_168682,118224388,118230855,118229793,118236696,118229150,118209565,118212689,118218065,118213827,118219850,118233344,118214744,118224921,118230986,118229107,118210583,118221159,118234701,118220241,118216564,1182172…
GO:0006879	cellular iron ion homeostasis	biological_process	0.65129	1	3	6525	13	24278	1.1822e+26
GO:0055072	iron ion homeostasis	biological_process	0.65129	1	3	6525	13	24278	1.1822e+26
GO:0007205	protein kinase C-activating G-protein coupled receptor signaling pathway	biological_process	0.65212	1	4	6525	14	24278	1.18223e+35
GO:0030507	spectrin binding	molecular_function	0.65237	1	4	6525	14	24278	1.18221e+35
GO:0046999	regulation of conjugation	biological_process	0.65374	1	2	6525	7	24278	1.18211e+17
GO:0004143	diacylglycerol kinase activity	molecular_function	0.65376	1	5	6525	18	24278	1.18214e+44
GO:0008443	phosphofructokinase activity	molecular_function	0.65427	1	10	6525	40	24278	1.18214e+89
GO:0032879	regulation of localization	biological_process	0.65501	1	32	6525	118	24278	118207519,118229021,118226818,118228853,118211389,118213788,118235161,118207245,118215515,118235860,118235449,118210979,118230701,118228984,118231112,118214531,118223772,118216977,118217625,118210697,118209690,118223589,XLOC_283220,118209996,118231328,118211690,118214651,118226103,118230865,118223851,118234599,118212609
GO:0032880	regulation of protein localization	biological_process	0.65546	1	4	6525	16	24278	1.18227e+35
GO:0051223	regulation of protein transport	biological_process	0.65546	1	4	6525	16	24278	1.18211e+35
GO:0060341	regulation of cellular localization	biological_process	0.65546	1	4	6525	16	24278	1.18227e+35
GO:0070201	regulation of establishment of protein localization	biological_process	0.65546	1	4	6525	16	24278	1.18227e+35
GO:0017148	negative regulation of translation	biological_process	0.65615	1	6	6525	24	24278	1.18219e+53
GO:0034249	negative regulation of cellular amide metabolic process	biological_process	0.65615	1	6	6525	24	24278	1.18236e+53
GO:0044815	DNA packaging complex	cellular_component	0.65658	1	16	6525	63	24278	1.18213e+143
GO:0008320	protein transmembrane transporter activity	molecular_function	0.65666	1	1	6525	3	24278	118214908
GO:0015450	P-P-bond-hydrolysis-driven protein transmembrane transporter activity	molecular_function	0.65666	1	1	6525	3	24278	118214908
GO:0004864	protein phosphatase inhibitor activity	molecular_function	0.65751	1	3	6525	11	24278	1.18222e+26
GO:0019212	phosphatase inhibitor activity	molecular_function	0.65751	1	3	6525	11	24278	1.18222e+26
GO:0008833	deoxyribonuclease IV (phage-T4-induced) activity	molecular_function	0.65796	1	1	6525	3	24278	118233575
GO:0006305	DNA alkylation	biological_process	0.65816	1	4	6525	16	24278	1.18235e+35
GO:0006306	DNA methylation	biological_process	0.65816	1	4	6525	16	24278	1.18219e+35
GO:0044728	DNA methylation or demethylation	biological_process	0.65816	1	4	6525	16	24278	1.18235e+35
GO:0007266	Rho protein signal transduction	biological_process	0.6591	1	33	6525	113	24278	118215697,118208358,118235718,118217672,118228082,118213841,118210651,118224751,118212137,118207956,118220673,118233709,118224909,118219974,118228069,118231065,118207483,118226261,118230380,118226292,118233650,118210566,118230331,118210610,118219365,118211301,118224653,118212770,118206655,118210532,118209999,118215735,118208401
GO:0035023	regulation of Rho protein signal transduction	biological_process	0.6591	1	33	6525	113	24278	118226261,118207483,118231065,118230331,118210566,118233650,118226292,118230380,118219365,118210610,118209999,118208401,118215735,118206655,118210532,118212770,118224653,118211301,118235718,118217672,118208358,118215697,118213841,118228082,118224751,118210651,118228069,118219974,118224909,118207956,118233709,118220673,118212137
GO:0031082	BLOC complex	cellular_component	0.65977	1	8	6525	33	24278	1.18223e+71
GO:0031083	BLOC-1 complex	cellular_component	0.65977	1	8	6525	33	24278	1.18223e+71
GO:0003855	3-dehydroquinate dehydratase activity	molecular_function	0.65982	1	1	6525	3	24278	118214865
GO:0042025	host cell nucleus	cellular_component	0.66019	1	40	6525	148	24278	118208657,118215029,118211880,118224221,118214021,118222289,118235890,118215534,118226944,118221727,118236371,118236711,118227878,118225584,118210433,118207482,118227672,118234817,118214637,118219051,118237063,118216416,118229179,118210769,118231414,118213172,118235385,118219555,118236425,118208621,118216641,118235389,118232357,118229961,118227991,118207489,118226431,118219089,118212900,118231588
GO:0004672	protein kinase activity	molecular_function	0.66132	1	282	6525	1016	24278	118210566,118209565,118225122,118211112,118227276,118212660,118229758,118207429,118214040,118226327,118235842,118230801,118219163,118220071,118206947,118225328,118211992,118231010,118220808,118211655,118222871,118212767,118216228,118226917,118214387,118223902,118208395,118214654,118209118,118236696,118219228,118225724,118228536,118229106,118211762,118224956,118210582,118218601,118208234,118227667…
GO:0005853	eukaryotic translation elongation factor 1 complex	cellular_component	0.66135	1	1	6525	4	24278	118234337
GO:0009072	aromatic amino acid family metabolic process	biological_process	0.66149	1	7	6525	28	24278	1.18232e+62
GO:0005200	structural constituent of cytoskeleton	molecular_function	0.66183	1	8	6525	31	24278	1.18219e+71
GO:0015948	methanogenesis	biological_process	0.66185	1	12	6525	48	24278	1.18237e+107
GO:0015975	energy derivation by oxidation of reduced inorganic compounds	biological_process	0.66185	1	12	6525	48	24278	1.18237e+107
GO:0043447	alkane biosynthetic process	biological_process	0.66185	1	12	6525	48	24278	1.1821e+107
GO:0006278	RNA-dependent DNA replication	biological_process	0.66206	1	2	6525	8	24278	1.18215e+17
GO:0005886	plasma membrane	cellular_component	0.66252	1	154	6525	585	24278	118222487,118208184,118228451,118215338,118216269,118216211,118216267,118222562,118210338,118207143,118233055,118225604,118216728,118214156,118217922,118210886,118214564,118211769,118209975,118225984,118229366,118230348,118216502,118213027,118206984,118229076,118221690,118233919,118233245,118219654,118223765,118223626,118214515,118222173,118213017,118223119,118223503,118206982,118233113,118213778…
GO:0070603	SWI/SNF superfamily-type complex	cellular_component	0.66253	1	3	6525	11	24278	1.18232e+26
GO:0030436	asexual sporulation	biological_process	0.66299	1	5	6525	20	24278	1.1822e+44
GO:0030120	vesicle coat	cellular_component	0.66301	1	19	6525	72	24278	1.1821e+170
GO:0030135	coated vesicle	cellular_component	0.66301	1	19	6525	72	24278	1.18223e+170
GO:0030662	coated vesicle membrane	cellular_component	0.66301	1	19	6525	72	24278	1.18216e+170
GO:0045892	negative regulation of transcription, DNA-templated	biological_process	0.66419	1	21	6525	79	24278	1.18237e+188
GO:0051253	negative regulation of RNA metabolic process	biological_process	0.66419	1	21	6525	79	24278	1.18215e+188
GO:1902679	negative regulation of RNA biosynthetic process	biological_process	0.66419	1	21	6525	79	24278	1.18211e+188
GO:1903507	negative regulation of nucleic acid-templated transcription	biological_process	0.66419	1	21	6525	79	24278	1.18237e+188
GO:0050385	ureidoglycolate lyase activity	molecular_function	0.66424	1	1	6525	4	24278	118219923
GO:0016459	myosin complex	cellular_component	0.66439	1	30	6525	104	24278	118233456,118216330,118222378,118208284,118229100,118220555,118225980,118233064,118209922,118220554,118225821,118233483,118215170,118209779,118224956,118216601,118216933,118216727,118217042,118227865,118210622,118218466,118220372,118213338,118206158,118214394,118223603,118228522,118217177,118216985
GO:0004715	non-membrane spanning protein tyrosine kinase activity	molecular_function	0.66469	1	3	6525	11	24278	1.18226e+26
GO:0019200	carbohydrate kinase activity	molecular_function	0.66511	1	11	6525	44	24278	1.18224e+98
GO:0033647	host intracellular organelle	cellular_component	0.66543	1	42	6525	156	24278	118234817,118227672,118210433,118207482,118225584,118227878,118236711,118221727,118223784,118211995,118236371,118226944,118215534,118222289,118235890,118214021,118224221,118215029,118208657,118211880,118231588,118212900,118226431,118219089,118227991,118207489,118229961,118235389,118232357,118216641,118208621,118219555,118236425,118235385,118229179,118210769,118213172,118231414,118237063,118216416…
GO:0033648	host intracellular membrane-bounded organelle	cellular_component	0.66543	1	42	6525	156	24278	118213172,118210769,118231414,118229179,118235385,118219051,118214637,118216416,118237063,118207489,118227991,118219089,118226431,118212900,118231588,118236425,118219555,118208621,118235389,118232357,118216641,118229961,118215534,118226944,118236371,118223784,118211995,118221727,118236711,118211880,118215029,118208657,118214021,118224221,118235890,118222289,118207482,118210433,118227672,118234817…
GO:0006024	glycosaminoglycan biosynthetic process	biological_process	0.66609	1	5	6525	19	24278	1.18221e+44
[truncated: 1,978 more rows]
